# Supplementary material for: Fermented Chinese Herbs Improve the Growth and Immunity of Growing Pigs through Regulating Colon Microbiota and Metabolites
Source: Animals (Basel). 2023 Dec 15;13(24):3867. doi: 10.3390/ani13243867 (PMC10740985; doi:10.3390/ani13243867)
Supplement: Supplementary file 1 [file animals-13-03867-s001.zip › Table S1.xlsx]

## Sheet: Table_S1
Name	Control3	Control2	Control1	Control4	Control5	B1	B2	B3	B4	B5
Scyphostatin	5223.84	5295.83	5394.32	5386.06	5341.98	5716.24	5541.78	5555.3	5753.66	5747.18
Lutein	4461.92	4365.12	4932.89	4829.29	4820.15	6048.93	5536.53	5783.89	6280.3	5921.1
Dihydroxyacetone phosphate	1434.71	1456.83	1543.36	1477.67	1503.54	1717.07	1689.45	1662.5	1723.98	1712.74
PE(16:1(9Z)/22:0)	1035.84	1053.79	1164.3	1082.54	1097.24	1391.4	1312.08	1341.82	1411.78	1394.75
1-Palmitoyl Lysophosphatidic Acid	399.139	371.119	411.457	398.895	398.047	526.791	476.969	472.577	528.421	508.036
sinefungin	3626.7	3606.63	3739.14	3699.79	3659.74	3942.35	3869.39	3851.87	4027.07	3964.48
PE(18:1(9Z)/0:0)	64428.8	63315.6	63598.5	64538.3	63356.2	67211.2	66121.2	65061.3	67414.2	67243.7
Kanosamine	69.6652	72.2423	72.1579	79.3661	79.0605	96.2291	93.062	91.8409	108.823	110.755
PC(TXB2/22:4(7Z,10Z,13Z,16Z))	1168.59	1101.7	978.206	1171.95	1209.76	1601.11	1515.72	1413.29	1720.64	1590.44
7,8-Dihydrovomifoliol 9-[apiosyl-(1->6)-glucoside]	211.298	205.86	200.54	215.016	212.797	247.326	260.178	241.249	277.368	265.004
Deoxycholyltryptophan	5056.87	5070.49	4867.05	4736.56	5079.65	7812.52	7025.32	6058.24	7687.42	7403.88
Geranylhydroquinone	38333.1	38855.1	38451.7	39208.9	40528.4	52134.9	50818.7	44954.3	53269.4	51948.6
PG(PGF1alpha/i-19:0)	9497.78	9849.9	10130.2	10221.4	10067	14057.5	12609.7	11804.9	13424.9	13909.5
Gentisate aldehyde	584.278	582.385	610.609	614.738	599.446	743.901	687.703	680.317	738.149	758.396
PIP(22:3(10Z,13Z,16Z)/20:3(8Z,11Z,14Z)-2OH(5,6))	1080.84	1043.39	1104.08	1116.84	1132.75	1297.27	1268.25	1254.94	1322.78	1336.54
PGP(a-25:0/20:3(6,8,11)-OH(5))	4239.86	4219.4	4464.58	4508.5	4479.92	5033.54	4969.42	4813.7	5184.82	5105.83
Carboxyiminocarbamic acid	156.08	155.484	160.343	154.903	153.4	174.572	168.399	172.045	189.947	188.891
Floionolic acid	102.702	107.672	111.232	103.982	104.503	133.549	119.588	124.644	148.674	148.65
Erythromycin	647.054	696.599	745.258	671.639	657.658	814.589	793.916	761.537	853.528	841.675
CDP-DG(18:2(9Z,11Z)/i-24:0)	401.798	463.217	448.824	448.913	422.53	521.31	515.892	510.805	562.394	554.811
Aethusin	110.622	111.142	111.279	106.125	112.469	124.439	117.638	123.867	123.139	122.029
PS(PGF2alpha/20:0)	1439.49	1510.53	1431.49	1485.66	1639.36	1862	1751.67	1804.57	2010.44	1884.81
Diplodiatoxin	107.452	114.065	107.724	110.531	114.42	130.432	120.339	127.684	130.159	128.015
PS(20:5(7Z,9Z,11E,13E,17Z)-3OH(5,6,15)/24:0)	2989.11	2915.12	3116.38	3108.27	3107.98	3918.58	3432.81	3624.53	4270.68	3671.07
DG(22:6(4Z,7Z,11E,13Z,15E,19Z)-2OH(10S,17)/16:0/0:0)	9353.63	9076.95	9103.77	8945.26	9189.49	11702.7	10469.8	10932.7	11272.2	10441.7
15(S)-15-methyl PGF2α methyl ester	830.664	756.561	792.861	760.602	757.199	1033.45	899.955	908.869	975.926	906.95
Nb-p-Coumaroyltryptamine	2397.74	2333.82	2381.35	2328.29	2360.92	2707.93	2465.76	2561.43	2585.97	2544.07
Asteltoxin	605.802	610.538	599.86	590.549	621.336	656.884	651.672	643.085	665.034	643.886
Lilopristone	310.945	333.116	338.243	300.807	352.142	419.643	394.261	415.22	415.412	407.265
Deacetylcephalosporin C	94.5819	93.2597	100.725	87.6566	103.237	137.461	141.674	145.736	143.784	126.941
3-Carboxyoxy-2-hydroxypropanoic acid	215.215	218.864	218.679	215.576	222.828	244.875	247.414	242.39	255.155	245.439
6-Deoxocastasterone	27.1858	20.9214	19.7637	25.4736	29.4633	60.782	49.4353	54.731	64.4797	56.1809
Glucitol-lysine	102.7	104.64	80.3962	90.6583	126.478	161.1	153.754	150.939	149.688	151.164
dihydrocytochalasin B	37.4248	21.7304	32.5099	20.5794	57.2884	82.9213	81.033	95.515	93.5005	81.8423
Benzoquinoneacetic acid	508.751	576.878	541.439	551.616	524.245	646.525	613.94	590.504	612.472	617.969
PA(14:0/20:0)	2758.39	3003.43	2694.46	2748.85	2889.05	3801.13	3894.31	3395.34	3649.3	3826.89
Avermectin A1b aglycone	711.756	850.056	837.332	763.537	841.771	1299.87	1393.55	1133.08	1222.61	1239.82
Nitrous oxide	249.899	247.805	240.067	242.036	247.537	318.642	298.433	303.366	311.92	312.391
Docetaxel anhydrous	3007.99	2992.74	2961.55	2975.71	2997.67	3649.41	3535.53	3544.48	3633.34	3627.83
15-Hexadecanolide	208.443	196.572	172.078	174.042	177.95	338.865	308.42	323.382	341.595	368.978
1-Amino-2-naphthol	2261.99	2194.61	2128.21	2181.33	2144.73	2577.9	2563.25	2564.49	2629.74	2628.94
Monacolin L acid	570.985	543.787	529.383	535.524	527.315	739.277	732.771	734.962	743.721	757.41
N-BENZYL-3-CYANOAZETIDINE	45.4848	25.5844	28.8908	25.602	17.8611	169.568	149.707	190.973	179.985	195.884
CDP-glycerol	392.315	355.629	367.571	367.834	348.821	511.655	474.485	520.415	525.281	504.416
4-Hydroxy-2,6,6-trimethyl-3-oxo-1,4-cyclohexadiene-1-carboxaldehyde	357.707	353.96	341.752	348.115	338.248	472.855	447.647	468.673	469.833	460.613
5-Hydroxy-2-(1-hydroxy-5-methyl-4-hexenyl)benzofuran	513.797	495.158	480.664	509.994	491.071	654.63	644.268	670.968	667.994	651.271
Pyridinoline	1832.8	1763.21	1792.1	1766.89	1728.37	2043.11	2033.09	2014.96	2080.22	2067.4
Avocadyne 2-acetate	5747.74	5653.7	5687.08	5658.58	5536.67	6557.28	6498.38	6513.61	6723.91	6612.9
AH 6809	3961.96	3923.54	3930.13	3829.45	3805.17	4693.16	4652.58	4646.92	4784.91	4805.31
Cinncassiol A	4576.44	4506.94	4585.43	4599.37	4498.73	5060.28	5037.61	5073.23	5146.72	5141.75
Oxyphencyclimine	9630.62	9548.1	9505.81	9614.13	9371.28	10350.4	10276.7	10346	10523	10552
hexadecanedioate	484.133	500.952	489.314	513.683	531.428	716.605	727.45	767.362	781.794	759.872
1-Cinnamoylpiperidine	151.523	142.962	139.364	157.78	157.166	247.335	263.082	285.159	279.052	278.699
Propamocarb	173.38	184.682	172.762	188.235	197.526	294.894	311.3	337.113	336.69	321.865
Angiotensin (1-7)	228.784	216.17	219.603	237.483	220.239	308.841	321.317	354.514	342.891	360.831
Pro Arg Tyr His	2557.45	2524.36	2446.93	2516.41	2395.75	3255.31	3423.46	3555.37	3648.62	3630.14
2-Hydroxy-3-methylpentanoic acid	29.3099	30.897	28.356	32.6237	27.1218	93.7575	99.8884	106.201	110.371	113.676
7-Ethyl-3,6-dihydro-1,4-dimethylazulene	119.966	117.738	120.079	119.544	111.835	193.103	207.627	213.987	219.115	220.543
Pteroside B	5397.68	5313.7	5129.57	5324.21	5303.45	5720.42	5700.34	5772.79	5801.93	5860.39
N,N-Dimethylaniline	1700.38	1614.4	1564.31	1595.09	1573.13	1862.57	1919.76	1938.76	1953.86	1930.12
Mepivacaine	3483.83	3341.57	3263.4	3307.45	3344.95	3757.34	3819.95	3898.44	3899.7	3886.85
BYSSOCHLAMIC ACID	1186.9	1156.76	1103.01	1125.04	1152.56	1354.55	1343.34	1364.19	1385.61	1381.06
epsilon,gamma-Caroten-3-ol	75255.6	71701.3	70145.4	71453.4	72384.2	84649.5	83227.8	86118.8	84353.1	86149.4
Gibberellin A74	1643.14	1603.11	1637.09	1681.81	1624.36	1784.43	1789.89	1776.94	1821.65	1820.27
Eburicoic acid	22570.5	22210	22173.2	22733	22725.9	25640.5	25235.4	25433.8	26388.5	25772.9
5,6-epoxy,18R-HEPE	12631.7	12342.3	12254.4	12569.1	12391	14440.5	14250.8	14374.5	14701.4	14581.4
Tetradecanedioic acid	3494.94	3371.99	3336.45	3507.14	3451.15	4075.95	4051.38	4074.94	4231.99	4164.79
PC(16:0/LTE4)	2619.42	2617.15	2467.4	2697.77	2542.95	3195.14	3296.98	3180.9	3427.19	3268.36
5(S)-HETE	24714.7	24115.7	23176.7	25635.1	24462.4	30836.5	31226.6	31297.5	32525.1	30992
5-Hydroxyindoleacetic acid	103.091	103.229	98.2815	114.25	108.733	155.871	164.074	164.134	173.303	164.728
4-O-Methylglucuronic acid	4853.36	4666.69	4711.64	4820	4828.53	5206.36	5194.44	5291.77	5344.65	5237.87
4-Aminophenylphosphorylcholine	1151.35	1071.26	1084.77	1148.48	1108.77	1320.23	1299.63	1355.39	1369.99	1337.3
5-Methoxyindoleacetate	935.342	892.143	907.166	942.089	921.975	1128.32	1092.28	1131.08	1122.61	1117.22
1,7-Phenanthroline	909.121	881.786	828.076	932.885	896.625	1181.52	1166.77	1169.56	1185.36	1174.35
Flazine	204.337	196.043	187.426	214.729	213.433	335.586	333.161	336.931	349.85	343.013
(+)-Marmasmic acid	20.1858	16.4014	16.1042	24.637	21.3257	40.3598	36.325	36.447	48.463	40.972
Pyrrole, 2-pentyl	130.254	129.994	123.543	141.388	132.758	158.33	159.597	161.766	167.493	163.804
(3b,16a,21b,22a)-12-Oleanene-3,16,21,23,28-pentol-22-angeloyloxy-23-al	2047.06	1946.88	1914.27	2050.69	1994.52	2322.67	2358.52	2353.47	2529.52	2459.14
7-Epi-12-hydroxyjasmonic acid	1106.8	1017.14	985.725	1121.32	1030.52	1271.23	1217.51	1291.8	1348.34	1344.8
L-Monomenthyl glutarate	1019.17	984.714	978.068	1007.31	995.316	1066.4	1060.83	1071.8	1084.94	1085.78
Secasterone	502.732	480.002	490.172	633.621	610.528	1031.76	972.549	965.056	1133.98	1164.42
Melibiitol	487.791	499.21	488.406	516.625	513.658	613.997	613.775	611.721	633.528	633.698
PC(15:0/18:4(6Z,9Z,12Z,15Z))	1300.78	1417.11	1387.9	1451.73	1430.83	1769.11	1775.21	1749.74	1854.66	1860.61
CL(8:0/11:0/11:0/12:0)	348.187	373.392	415.458	395.624	455.034	866.989	819.941	790.469	857.169	837.282
Prenol	56.1753	58.9518	59.2718	59.4986	57.7396	76.6893	77.8642	77.3002	80.4783	80.4794
Glyuranolide	6174.16	6156.53	6229.26	6385.72	6226.91	7266.61	7167.16	7135.46	7274.86	7255.71
PGP(i-22:0/18:3(10,12,15)-OH(9))	5231.45	5345.21	5543.83	5726.6	5429.36	7060.98	6835.78	6867.22	6976.66	7006.05
PS(18:3(9Z,12Z,15Z)/24:0)	13108.5	13155.2	13759.9	14042.4	13551.5	18491.3	18562.3	18645.2	19114.9	18808
Lithocholic acid	329101	330517	340290	342822	337169	403772	396134	398511	408709	408538
Cohibin C	29297.3	29760.3	30279.7	30497.8	29957.9	34162.3	33288.8	33471	34092.2	34176.2
PI(18:0/PGF2alpha)	1854.97	1921.54	1968.32	2017.21	2020.84	2490.53	2455.58	2421.87	2561.69	2569.05
PI(22:3(10Z,13Z,16Z)/TXB2)	3971.6	4109.96	4259.96	4222	4273.9	5093.93	5038	5017.22	5169.94	5229.75
16&alpha;-hydroxyprednisolone	1113	1120.61	1161.54	1126.53	1113.19	1293	1305.82	1336.34	1383.71	1382.38
Eriojaposide B	23.9185	26.049	22.5565	21.7841	18.9066	96.4745	104.183	99.121	110.261	123.741
2,6-Dimethylbenzenethiol	4.59089	9.21713	7.79611	6.37484	5.02188	26.9163	27.4981	28.9723	33.1812	33.8016
Traxoprodil	203.398	206.086	224.108	210.68	212.136	310.806	304.448	327.651	323.263	329.655
(2R,3R)-3-Methylornithinyl-N6-lysine	55.5895	54.0772	59.6148	56.5803	60.9307	88.2118	86.1348	95.0743	93.3854	92.3798
DG(21:0/6 keto-PGF1alpha/0:0)	16617.5	16916.1	17686.6	17576.3	17444.4	20290.9	19658.4	20129.6	20199.2	20480.9
(Z)-alpha-Bergamotenoic acid	40.3655	41.6644	45.2962	49.3838	44.2768	72.9544	70.6213	76.9367	74.0627	73.2654
W123	59174.2	58780.1	59023.5	61086.4	60606.4	69956.6	68372	68223.7	69839.5	69197.4
PA(LTE4/24:1(15Z))	1247.2	1255.98	1241.72	1286.73	1302.25	1704.86	1593.86	1585.12	1731.96	1655.47
PZ-Peptide	2252.25	2243.76	2259.21	2301.94	2232.09	2958.85	2973.6	3052.38	3183.62	3082.5
(S)-p-Menth-1-ene-4,7-diol 4-glucoside	178.113	166.677	171.759	201.475	195.864	346.551	325.744	358.964	394.082	362.461
N-Stearoyl Isoleucine	1646.67	1674.19	1677.47	1701.32	1638.97	1875.52	1910.47	1884.28	1957.97	1915.69
PI(20:0/PGF1alpha)	3835.36	3916.01	3957.29	3984.36	3901.37	4623.2	4571.78	4570.81	4795.5	4647.79
9-F1-phytoprostane	782.201	799.726	788.331	804.791	771.682	951.629	948.406	954.95	977.284	964.046
Arginyl-Gamma-glutamate	39344	38948.1	39286.3	39283.2	38731.2	47194.4	47192.5	47301.1	48190.1	48017.2
3-Hydroxydodecanedioic acid	5262.62	5245.36	5289.71	5292.93	5228.84	6357.83	6271.74	6281.41	6451.02	6423.01
Mikamycin B	620.976	625.714	635.808	625.789	624.618	1214.2	1189.34	1194.22	1268.37	1256.88
Dracorhodin	1683.07	1706.74	1656.09	1673.56	1638.86	2451.8	2425.25	2450	2520.3	2527.48
2-[4,7,10-Tris(carboxymethyl)-6-[4-[3-(2,5-dioxopyrrol-1-yl)propanoylamino]butyl]-1,4,7,10-tetrazacyclododec-1-yl]acetic acid	875.845	877.34	852.17	859.463	849.405	1200.52	1195.73	1187.05	1253.63	1242.76
Deoxyloganin	591.41	601.133	620.77	603.033	573.822	805.837	815.421	825.312	867.81	882.879
PS(20:0/22:5(4Z,7Z,10Z,13Z,16Z))	3.46466	3.24516	0.567589	2.26933	0.505255	474.416	530.446	466.259	606.804	622.632
PI(20:0/PGJ2)	2458.25	2478.57	2572.68	2546.61	2549.94	3131.21	2990.34	2959.35	3204.09	3119.89
Gln Val Ile Asp	11036.4	11174.9	11375.1	11279.8	11334.9	12459.9	12502.5	12441.9	12853.3	12733.3
PI(22:2(13Z,16Z)/PGF2alpha)	886.081	939.24	985.409	944.029	948.423	1328.32	1318.58	1305.2	1424.44	1372.59
PGP(i-24:0/20:4(5Z,8Z,11Z,14Z)-OH(20))	1907.89	1904.01	1947.57	1949.37	1978.24	2314.03	2292.17	2274.67	2422.94	2303.61
MG(0:0/18:2(9Z,12Z)/0:0)	11832.8	12153.1	12268.2	12328.3	12364.3	16399.2	16237.4	15781.4	17671.7	16830.5
1-Deoxy-11-oxopentalenate	11808.7	11710.4	11838.6	11866.2	11607.1	12495.3	12240.7	12299.4	12641.5	12493.2
Guanosine	1420.53	1378.61	1419.17	1432.28	1386.71	1587.08	1547.12	1553.25	1624.29	1579.07
MeOSuc-Ala-Ala-Pro-Val-PNA	29116.2	29107.5	29309.1	29210.1	28937.4	31027.7	30626.4	30950.6	31628.1	31153.7
9(S)-HODE-d4	425582	421185	422986	423956	418108	457466	444430	449582	457393	455188
CDP-DG(TXB2/i-14:0)	10.8396	14.1579	15.6785	3.02113	10.551	72.8537	68.6505	79.8862	117.661	121.33
Vitamin D3	1637.17	1644.47	1674.27	1623.01	1627.43	1838.81	1784.38	1808.57	1904.95	1890.23
5alpha-androst-16-en-3-one	377.453	355.619	390.13	373.658	371.96	464.079	470.952	481.496	489.111	480.982
p-Hydroxyubenimex	9917.05	9897.48	10171.5	9823.11	9686.32	11032.8	11011.8	11208.5	11372.7	11252.6
Incensole oxide	85.1178	79.7666	89.1068	81.307	76.0867	114.137	113.298	114.888	123.463	120.626
SM(d19:0/20:5(7Z,9Z,11E,13E,17Z)-3OH(5,6,15))	1587.6	1647.9	1787.03	1576.54	1602.62	2364.73	2406.71	2340	2401.71	2463.66
(2,5-Dihydroxypyrrol-1-yl) 5-[(3aS,4S,6aR)-2-oxo-1,3,3a,4,6,6a-hexahydrothieno[3,4-d]imidazol-4-yl]pentanoate	1110.23	1127.5	1181.68	1067.47	1128.11	1791.98	1769.18	1748.17	1785.06	1816.57
Arginylphenylalaninamide	1731.96	1965.41	2055.61	1821.45	1879.53	3766.35	3757.59	3427.69	3689.62	3838.8
DL-11-hydroxy stearic acid	38.1291	35.6083	40.8653	35.046	31.5617	76.8223	75.3191	65.884	74.2758	75.1195
PE(17:0/0:0)	14486.1	14425.6	15012.1	14456.3	14357.4	17634.1	17229.3	17146.7	17638.1	17595.7
Selanc	1342.75	1353.13	1381.13	1389.2	1363.15	1985.96	1978.77	1908.87	2037.75	2046.14
PE(24:0/22:5(7Z,10Z,13Z,16Z,19Z))	3630.61	3711.85	3863.98	3792.12	3757.94	5593.32	5468.02	5236.14	5535.78	5659.34
(7,8-Dihydro-5-((E)-((a-(3-pyridyl)benzylidene)aminooxy)ethyl)-1-naphthyloxy)acetic acid	674.688	675.161	672.654	686.981	698.709	864.727	849.899	848.758	937.038	910.04
Isopetasoside	1319.04	1297.72	1296.29	1307.8	1318.89	1520.42	1521.3	1495.36	1587.97	1583.4
2',4'-Dihydroxy-6'-methoxy-3',5'-dimethylchalcone	1236.21	1232.3	1247.96	1232.23	1258.54	1541.63	1544.36	1465.08	1577.04	1571.32
5-Phenyl-1,3-pentadiyne	26.3664	24.8434	25.2197	25.2353	25.6247	58.4573	54.7856	51.1129	66.5271	65.8364
(8R,9S,10R,13S,14S,17R)-13-Ethyl-17-ethynyl-3-nitroso-2,3,6,7,8,9,10,11,12,14,15,16-dodecahydro-1H-cyclopenta[a]phenanthren-17-ol	558.352	558.591	553.29	613.753	590.43	1106.58	1097.26	1138.82	1220.66	1172.85
Ptaquiloside	1865.27	1875.06	1888.82	1876.7	1881.64	2239.85	2259.57	2233.59	2301.47	2309.91
PG(i-20:0/22:6(5Z,8E,10Z,13Z,15E,19Z)-2OH(7S, 17S))	1364.51	1318.67	1383.57	1365.68	1439.32	2458.77	2527.1	2413.66	2710.53	2598.71
Mammea B/BC cyclo E	3269.2	3328.68	3367.44	3324.01	3323.17	4504.02	4567.33	4580.62	4799.67	4725.49
Nebramycin 5'	3151.36	3143.15	3248.79	3434.92	3320.85	6350.78	6374.32	6441.76	7013.92	6684.88
PA(22:2(13Z,16Z)/PGJ2)	6160.82	6129.4	6157.58	6455.68	6466.41	10152	9880.19	9482.73	10060.8	10038.3
Heptanoic acid	5493.97	5390.39	5536.34	5337.22	5707.11	9635.55	9838.36	9333.75	9889.52	9656.56
Porson	1499.04	1474.41	1486	1518.27	1532.85	2498.88	2534.93	2465.71	2579.33	2531.94
Limazocic	611.404	600.145	596.312	614.846	632.498	987.228	1023.19	974.116	1022.9	1010
LysoPA(P-16:0/0:0)	1614.26	1614.38	1577.88	1681.1	1642.75	3644.98	3629.6	3706.23	3735.7	3931.09
11'-Carboxy-gamma-chromanol	1326.4	1345.52	1355.91	1386.16	1366.83	1786.62	1798.2	1810.73	1833.76	1858.05
PG(20:3(8Z,11Z,14Z)-O(5,6)/i-14:0)	1326.86	1362.78	1339.14	1443.92	1392.31	2264	2283.29	2235.99	2348.2	2315.43
Erythromycin 2'-acetate	30455.5	30588.7	30468.1	32011.5	31712.3	47491.1	47284	46898.5	48862	47813.1
N-Linoleoyl Tryptophan	2945.48	2931.28	2993.48	3016.32	2969.08	3837.48	3883.24	3825.67	3907.58	3882.02
N-Palmitoyl tyrosine	4165.61	4246.28	4302.8	4350.96	4455.3	6907.46	6912.73	6777.53	6959.68	7017.15
PE(20:1(11Z)/18:0)	1269.59	1336.73	1400.05	1468.54	1535.43	4165.33	4239.77	4099.6	4351.25	4455.14
Calcidiol	1077.61	1086.12	1077.07	1082.22	1058.7	1550.17	1546.96	1555.88	1587.46	1575.82
PS(16:0/0:0)	14573.6	14435.8	14730.5	14609.8	14421.6	23552.1	23382.5	23567.4	23897.4	23704.1
PA(22:4(7Z,10Z,13Z,16Z)/24:1(15Z))	2159.04	2293.21	2301.44	2303.86	2198.35	6150.75	6420.45	6202.82	6531.7	6434.33
8-Acetylegelolide	26496.4	27172.8	27594.9	27223.8	27671.6	46816.2	47381.5	47090.6	48312.1	48090.2
PS(22:4(7Z,10Z,13Z,16Z)/18:0)	2725.71	2872	3030.96	2969.61	2956.87	7018.56	7093.63	6973.68	7250.8	7159.31
3h-Phenylalanine	167.416	165.925	171.535	157.627	158.325	574.305	587.97	593.64	607.387	611.759
Cadalene	98.317	98.791	100.242	96.2739	92.7234	472.948	482.968	490.122	503.655	517.444
3,3-Dimethylglutaric acid	1631.04	1607.03	1638.97	1685.09	1659.17	2824.94	2799.15	2816.13	2913.47	2898.52
3-Methyladipic acid	2785.55	2744.96	2807.32	2904.3	2878.82	6434.79	6413.78	6492.26	6668.45	6613.24
Azelaic acid	15391.5	15314.1	15481.6	15656	15673.4	23661.6	23658.5	23608.9	23996.2	24061
1-heptadecanoyl-sn-glycerol 3-phosphate	14749.6	14942.9	14925.5	14989.7	14776.1	32276.6	32273	32515.9	34007.8	34164.9
(S)-Limonene	256.956	244.162	236.583	253.976	251.94	1431.64	1447.19	1450.11	1530.6	1531.48
1,2,3,4,tetrahydro-1,5,7-trimethylnapthalene	288.398	284.292	278.351	285.956	285.247	897.559	909.939	917.181	960.905	964.599
Cynaropicrin	7441.45	7472.12	7418.36	7460.65	7436.49	10365.4	10284.6	10321.4	10553	10562.3
N-Linoleoyl Glutamic acid	2567.22	2544.25	2499.37	2615.55	2544.14	5935.6	5988.62	5941.91	6233.47	6176.32
Baccatin	52467.4	51812.8	51394.7	53949.9	53557.9	120117	119762	119566	125172	124084
Epothilone C	1004.17	1023.55	1033.09	984.477	1003.33	1504.18	1523.75	1475.88	1543.49	1541.75
TyrMe-TyrMe-OH	3549.78	3603.77	3690.71	3627.4	3597.81	4896.19	4910.1	4847.53	5028.51	5051.58
SM(d20:1/22:6(5Z,8E,10Z,13Z,15E,19Z)-2OH(7S, 17S))	985.256	1017.53	1115.3	1080.55	1048.63	2629.44	2630.68	2586.21	2789.67	2750.74
PGP(a-13:0/6 keto-PGF1alpha)	1468.95	1453.85	1514.22	1499.34	1464.51	2897.29	2862.77	2797.87	2926.49	2942.36
Gentamicin C1	5926.99	5997.25	6131.04	6044.29	5984.2	8183.89	8046.77	7956.86	8249.85	8235.22
15-Hydroxyleptocarpin	572.781	584.235	584.921	587.313	589.064	1134.92	1125.08	1108.17	1210.81	1170.61
DEOXYSAPPANONE B 7,3'-DIMETHYL ETHER	28901.8	29378	29579.1	29246.7	29394.9	41677	40822.1	41253	42197.9	41954.4
Combrestatin A4	16737.4	16812.7	17004.5	16966.6	16984.8	21409.4	21055.7	21195.4	21804.1	21631.9
Deltorphin II	3163.49	3175.52	3221.34	3310.76	3207.37	5722.22	5594.03	5624.07	5898.37	5811.12
26-Hydroxyecdysone	2526.34	2416.78	2425.15	2534.51	2463.53	4417.98	4238.72	4333.76	4584.89	4481.29
(±)-Enterolactone	13564.3	13410.8	13590.5	13738.2	13534.1	20700	19943.4	20475.9	21046.5	20834.4
(±)-3',4'-Methylenedioxy-5,7-dimethylepicatechin	100739	99214.6	99874.9	101659	99327.2	140820	136595	139554	142794	141038
Tavulin	14802.6	14618.4	14702.9	14947.4	14633	20874.5	20209.2	20726.7	21031.5	20829.5
CPA(18:1(11Z)/0:0)	3430.46	3368.33	3390.68	3440.07	3364.23	8290.09	8033.94	7894.04	8247.32	8419.53
Diferuloylputrescine	11421.9	11195	11591.2	11579.2	11618.1	33269.9	32121.2	32518.2	33247.8	33881.4
Mifepristone	21503.6	21137.8	21044.9	21419.6	21042.6	43426.8	42213.5	42229.4	42865.6	43122.8
12-Oxo-20-hydroxy-leukotriene B4	2516.68	2396.69	2444.5	2538.82	2454.16	4300.01	4167.4	4210.55	4334.55	4357
Sebacic acid	13860.8	13728.7	13758.2	13838.4	13709.7	17020.3	16771.1	16861.9	17158.3	17130.8
2-Butyl-5-[2-(4-hydroxy-3-methoxyphenyl)ethyl]furan	2847.3	2826.43	2796.95	2886.09	2871.9	4626.66	4510.34	4493.24	4707.42	4611.7
Metapro	23216.8	22005.8	22027.7	23396.6	22702.9	43283.4	43147.3	42007.4	45107.5	44401.5
Topotecan	1122.85	1042.27	1079.96	1128	1099.94	2665.35	2622.08	2576.73	2754.05	2741.8
Dodecanedioic acid	57448.8	56041.2	56179.1	58050.2	57292.7	85957.4	84944.3	85299.5	86991	86319.6
Kanamycin B	73741.7	72695.5	73088.2	74201.3	73369	95604.4	94666	95284	95745.6	96345.7
15-epi-PGA1	5919.81	5831.68	5843.12	5889.13	5836.62	7249.07	7178.54	7200.51	7329	7332.06
11-Deoxy-PGE1	3202.13	3108.53	3064.47	3154.72	3098.49	4615.06	4618.28	4608.79	4720.56	4714.12
Kamahine C	20.05	18.3792	16.4367	15.2129	18.6059	47.3449	45.2049	46.6655	53.3817	51.1707
xi-8,9-Dehydrotheaspirone	281.622	280.123	278.563	258.21	264.032	460.537	451.323	478.432	482.786	468.487
Polygonal	460.701	444.723	434.405	421.935	438.504	882.589	879.4	910.981	917.704	939.374
6-hydroxy-7E,9E-Octadecadiene-11,13,15,17-tetraynoic acid	2629.28	2527.96	2530.95	2519.75	2544.03	3710.38	3680.55	3725.04	3810.06	3801.49
7-Hydroxyenterolactone	3265	3219.74	3194.85	3175.47	3187.77	4342.65	4324.56	4386.59	4444.55	4442.22
Bisacurone epoxide	1190.01	1176.44	1170.59	1165.31	1168.16	1419.09	1406.73	1426.31	1449.68	1436.41
1-Acetoxy-2-hydroxy-16-heptadecyn-4-one	164.446	168.68	164.072	137.432	169.421	523.463	514.864	531.655	555.016	573.872
Ganoderic acid I	13558.2	13275.2	13527.8	13579.8	13401.8	16431.5	15817.5	16307.3	16724.8	16665.4
Cholic acid	1788.83	1756.49	1811.15	1797.2	1790.09	2572.75	2468.63	2585.67	2648.02	2590.18
Ganoderic acid L	11617.3	11573.9	11648.3	11850.7	11802.7	13957.7	13922.6	13887.1	14296.9	14189.9
Gly Met Pro Thr	676.866	654.017	661.359	725.325	750.843	1255.15	1223.27	1250.47	1309.1	1281.66
PS(PGF1alpha/20:0)	30.4051	29.9432	23.1994	37.2596	43.8364	267.039	241.553	270.721	307.556	291.663
all-trans-Retinoyl-beta-glucuronide	521.56	502.628	476.48	569.647	546.482	1221.96	1221.62	1269.76	1343.6	1253.28
2,3-Dihydroxybenzoic acid	768.39	751.776	725.924	762.263	759.358	1223.03	1197.23	1227.42	1270.77	1237.55
N',N'-Diphenylhydrazinecarbohydrazide	20021.1	19582.5	19494.2	19822.5	19769.7	26229.1	25887.5	26292.7	26707.9	26542.6
CAY10397	45021.3	44487.9	44473.8	45369.7	44999.2	57235.8	56521.4	57302	58355.9	57858.5
Toluene-cis-dihydrodiol	119.808	122.035	118.261	121.255	118.249	141.361	141.349	140.64	148.183	142.451
Conophylline	493.492	509.158	505.244	512.518	498.065	654.351	635.028	644.614	671.022	661.675
Carbocyclic 3-deazaadenosine	5247.07	5234.97	5272.44	5312.98	5196.67	6780.57	6677.32	6639.4	7055.94	6862.43
10-Oxooctadecanoic acid	34484.9	36007.9	35054.9	35744.7	35404.5	47570.4	46540	47327.7	49468.2	47719.4
sphinganine (C20)	769.297	772.683	785.454	813.933	780.009	1121.11	1132.66	1139.55	1255.62	1263.64
Camelledionol	4217.35	4242.18	4279.79	4232.09	4217.21	5257.44	5283.15	5470.56	5653.36	5615.5
Elenaic acid	1239.6	1218.13	1239.03	1231.23	1234.43	1518.4	1520.04	1555.8	1589.22	1587.77
(22S)-1α,22,25-trihydroxy-26,27-dimethyl-23,23,24,24-tetradehydrovitamin D3 / (22S)-1α,22,25-trihydroxy-26,27-dimethyl-23,23,24,24-tetradehydrocholecalciferol	43870.8	43254.1	43643.5	44384.9	43761.2	54688.5	53874.2	54890	56439.7	56920.3
SM(d18:1/PGF1alpha)	309.573	324.2	332.116	302.164	311.018	449.074	457.635	444.759	488.939	473.051
(10S)-1α,19,25-trihydroxy-10,19-dihydrovitamin D3 / (10S)-1α,19,25-trihydroxy-10,19-dihydrocholecalciferol	44.5249	50.0668	60.6236	37.66	38.0786	268.288	267.801	268.468	333.374	286.943
2-(5,8-Tetradecadienyl)cyclobutanone	10681.4	10906	10879	10531.2	10664.3	14577.3	14503.4	14062.8	15497.4	14950.1
PG(i-20:0/LTE4)	2554.54	2600.9	2653.35	2568.46	2444.95	4254.98	4288.62	4141.39	4556.99	4471.44
Alfaprostolum	461.906	469.435	522.957	453.87	429.417	1267.62	1283.05	1241.93	1437.14	1411.36
Cuminaldehyde	1198.57	1144.03	1172.9	1155.86	1175.1	1307.04	1260.63	1292.44	1327.09	1337.75
5-Aminopentanoate	2398.39	2344.35	2396.84	2360.71	2405.59	2678.27	2617.15	2727.05	2727.51	2767.55
13(S)-Hydroperoxylinolenic acid	4454.58	4388.1	4438.81	4293.65	4405.97	4954.87	4928.34	4945.64	5046.77	5152.3
alpha-Terpineol butanoate	3458.41	3360.1	3485.38	3346.71	3419.12	3913.85	3832.94	3933.51	4017.24	4020.77
3-Gonal	2194.87	2156.01	2222.1	2126.48	2205.94	2547.2	2458.95	2524.1	2578.59	2604.64
2'-Deoxy-5-hydroxymethylcytidine-5'-triphosphate	219.538	222.218	232.605	243.604	228.798	359.592	315.069	332.41	335.18	363.84
Malonic semialdehyde	311.399	306.836	316.502	316.647	317.927	398.968	376.814	388.313	375.156	396.832
(R)-2-Ethylmalate	60.7212	59.3622	61.5908	56.0794	61.2384	83.026	77.4516	78.961	78.9675	80.9888
3-Oxo-3-ureidopropanoate	140.727	135.597	142.298	135.443	138.886	184.586	173.12	177.423	174.58	179.582
beta-hydroxyprednisolone	501.887	488.368	520.377	504.984	503.8	745.171	690.358	709.912	732.289	719.735
ent-16b,19-Kauranediol 19-acetate	589.42	592.097	614.085	597.814	610.414	742.863	727.163	750.152	761.219	754.283
5''-Phosphoribostamycin	4.03e-07	4.03e-07	0.285659	1.55023	3.33027	102.128	83.8266	57.0683	60.6759	83.1952
(-)-Arctigenin	937.964	951.171	892.631	947.944	997.415	1299.96	1277.61	1184.71	1219.87	1240.92
8-Oxohexadecanoic acid	149.799	133.894	128.891	130.294	128.903	205.708	198.979	169.416	177.145	181.771
Serylcysteine	344.525	331.247	325.143	332.206	334.797	399.414	383.109	379.541	371.879	402.564
L-xylo-Hexulonolactone	98.4891	89.1041	86.9903	91.0575	94.9078	121.454	112.33	112.826	108.211	111.902
Poppy acid	141.157	141.408	139.056	143.077	149.826	175.995	171.033	176.651	169.934	178.638
D-Glucuronolactone	264.307	269.249	260.746	252.657	277.102	327.274	314.815	311.742	310.784	318.616
Methylenediphosphonic acid	1279.79	1312.81	1293.89	1295.94	1362.86	1607.16	1585.22	1578.4	1529.68	1519.72
(1R,6R)-6-Hydroxy-2-succinylcyclohexa-2,4-diene-1-carboxylate	727.35	719.36	721.79	712.125	744.722	828.584	817.532	827.573	820.144	813.66
Dimethyl sulfoxide	102.44	97.0803	103.854	106.464	116.609	135.268	140.217	132.45	133.691	142.793
Monensin	572.34	766.034	727.067	831.892	924.837	1448.83	1517.47	1427.56	1462.85	1448.29
Acetyl tributyl citrate	55749.5	56735.7	58344.3	59696.9	61844.4	70220.1	69731.8	68539.2	69934.2	71072.8
Nevirapine	1286.02	1300.14	1280.28	1249.1	1267.07	1522.56	1495.23	1487.04	1519.21	1477.95
Pikromycin	143.484	146.866	141.774	107.387	155.522	710.886	728.901	648.685	711.183	510.731
Indeloxazine	33.4922	30.2753	37.057	29.7381	32.6225	71.8648	75.1252	67.5955	71.7657	66.8846
(1R,2S)-Naphthalene 1,2-oxide	670.291	682.421	673.236	695.05	708.306	852.288	841.775	803.553	852.238	808.767
N-Monodesmethyl-rizatriptan	4.03e-07	4.03e-07	4.03e-07	3.36088	8.56955	71.1557	69.7192	44.4629	69.2688	58.4547
p-CHLOROPHENYLALANINE	55511.7	55861.3	57251.4	56267.2	58073.7	70880.7	68728.4	65661.2	67277.1	67188.6
Aminoethylcysteine ketimine	20071.7	20209.8	20640.5	20363.4	21115.7	25573.3	24900.1	23981.7	24469.1	24329.1
Honokiol	455.935	460.108	483.55	467.175	484.521	623.688	597.683	615.13	601.251	611.844
11,17-Dihydroxy-6-methyl-17-(1-propynyl)androsta-1,4,6-triene-3-one	1733.94	1763.95	1828.24	1788.7	1838.4	2329.26	2216.17	2244	2268.63	2239.12
PA(20:5(7Z,9Z,11E,13E,17Z)-3OH(5,6,15)/22:2(13Z,16Z))	10410.7	10673	11441.8	11444.1	11885.8	16323.4	15814.4	15171.3	16030.6	15876
SM(d18:1/20:3(8Z,11Z,14Z)-2OH(5,6))	14910.8	15507.7	16657	15716.3	15924.9	21796.5	21138.5	20967.2	21835.4	21761.2
Glutamic acid gamma-methyl ester	3121.46	3172.79	3234.58	3140.71	3224.17	3754.71	3730.74	3664.86	3777.29	3717.87
N-Isobutyryl-L-cysteine	5.02521	3.05866	6.07	6.76168	7.49802	65.885	72.4719	71.5309	64.7043	75.6854
Perflutren	1129.55	1120.38	1137.29	1092.06	1157.5	2579.03	2578.16	2533.66	2542.73	2410.22
Narbonolide	19.9256	21.983	7.50335	31.6805	35.2616	726.85	717.731	785.756	680.458	687.278
alpha-Amylcinnamyl acetate	80.7174	82.7848	80.9717	79.0998	80.4439	179.941	177.429	185.579	180.154	179.837
Ilexgenin A	31258.3	32324.5	32575.8	30989.4	32872.3	53393.4	53811.9	48814.3	52714.2	52276.9
TG(15:0/18:4(6Z,9Z,12Z,15Z)/18:4(6Z,9Z,12Z,15Z))	3272.12	3351.34	3411.1	3384.73	3484.63	5334.86	5200.86	5067.67	5065.45	5201.88
Penicillin G	2197.58	2285.78	2323.09	2331.26	2390.1	3185.96	3217.38	3089.7	3130.2	3167.15
Dihydroouabain	927.09	935.3	929.385	949.943	938.242	1279.64	1333.98	1252.44	1274.63	1277.21
Glyzarin	312.437	313.415	303.939	330.423	313.913	490.38	526.101	500.562	493.067	490.133
(3E)-3-[(1R,5R,6S)-5-Hydroxy-7-oxabicyclo[4.1.0]heptan-2-ylidene]-2-oxopropanoate	95.1039	103.224	99.4782	99.9926	114.829	232.883	234.077	229.575	220.624	233.38
5-Hydroxyindoleacetylglycine	106.435	98.7265	109.596	93.743	114.133	292.855	311.862	288.517	282.568	294.651
Stachyose hydrate from Stachys tuberifera	92.8861	98.8103	95.6794	78.3672	91.6355	274.342	288.697	270.324	253.379	261.312
Perezone	1386.5	1366.52	1392.65	1377.16	1366.73	1812.19	1761.77	1703.1	1878.68	1756.56
1-Heptadecanoylglycerophosphoethanolamine	45703.2	44950.6	45445.6	46310.7	46645.8	59070.6	55442.4	54431.5	57886.8	56012.5
LysoPC(17:0/0:0)	58573	57473	57155.5	58172.6	58465.9	80005	73164.6	73635.5	79000.4	75318.2
UDP-N-acetylmuramoyl-L-alanine	107.693	113.7	124.201	123.169	108.734	242.091	222.024	223.459	246.206	209.026
2-Hydroxybutyric acid	85.5869	71.1289	78.0743	85.1632	77.8555	171.78	169.906	158.442	174.114	158.068
PIP(22:2(13Z,16Z)/PGJ2)	221.619	182.351	198.535	203.168	168.926	597.982	622.969	586.272	665.496	549.162
PG(a-25:0/20:4(5E,8Z,12Z,14Z)-OH(11R))	21915.2	21874.3	22552.6	22649.6	21985	27875.8	27521.2	26910.9	27506.4	27711.1
1-Stearoyl-sn-glycerol 3-phosphocholine	104507	104064	108261	108083	107149	150651	147299	144616	146141	150332
Raffinose	2146.74	2092.25	2225.84	2167.52	2183.75	3070.26	2989.76	2984.81	3005.79	3082.13
PC(2:0/PGF1alpha)	9755.99	9660.09	9798.38	9903.78	9776.07	13852.7	13384.3	13060.4	13093.2	13438.3
PI(18:1(12Z)-2OH(9,10)/20:0)	3576.09	3574.4	3750.2	3597.1	3533.88	5113.12	4968.04	4994.35	4959.97	5074.1
Propionic acid	88.9207	92.6566	95.1243	88.4118	83.893	197.888	184.08	181.993	181.779	184.468
5b-Cyprinol sulfate	7658.25	7634.99	7841.7	7519.15	7424.79	13891.7	12206.8	12972.5	13199.3	12641
Mercaptosuccinic acid	6613.4	6529.97	6674.83	6582.82	6580.25	7710.42	7472.61	7474.03	7567.17	7554.82
LysoPC(15:0/0:0)	32056.1	31625	31896.6	31796	31236.7	40726	39128.3	39048	39741.8	40031.3
Cholylserine	237908	235767	239469	241488	236985	284470	275009	275183	280074	280227
LysoPC(0:0/18:1(9Z))	32158	31544.1	32305.5	32651.7	31850.6	46473.4	43748.6	44241.9	45305.8	45040.5
Hexosylsphingosine	7061.42	7111.28	7104.17	7281.24	7046.5	9022.23	8571.99	8737.27	8783.14	8737.98
Scymnol	14072.9	13782.5	14355.5	14568.3	13774.5	19627.2	18388	18375	19735.4	18807.5
PE(22:0/20:4(8Z,11Z,14Z,17Z)-2OH(5S,6R))	6231.89	6110.06	6174.37	6148.56	5954.9	9115.91	8648.25	8786.46	9303.61	8852.36
10-Deoxymethynolide	449.248	437.157	445.627	443.916	438.586	515.44	532.448	506.214	534.689	519.302
PG(a-25:0/20:3(8Z,11Z,14Z)-2OH(5,6))	2226.58	2265.2	2265.67	2276.21	2275.95	2572.07	2716.33	2662.23	2747.29	2612.16
Palatinose	394.859	400.002	398.171	413.321	399.268	488.427	509.058	502.425	517.915	478.719
MG(22:6(4Z,7Z,10Z,13Z,16Z,19Z)/0:0/0:0)	194.001	198.562	197.19	196.507	200.256	255.276	273.347	267.54	275.404	254.565
BENZANTHRONE	89.766	82.108	86.6559	81.4397	88.6676	121.68	128.9	123.369	132.018	113.462
4-Demethylpremithramycinone	344.014	323.773	344.496	349.529	350.445	434.818	454.302	455.872	447.121	421.941
(+)-7-iso-jasmonate	572.354	565.648	558.617	569.802	568.586	632.03	663.136	654.537	652.009	642.697
3-Indolepropionic acid	200.174	194.171	202.992	197.418	204.79	257.143	289.593	273.953	278.187	269.676
Guanidinoproclavaminic acid	71.1116	60.2496	55.1395	56.4296	67.8956	109.732	120.561	105.344	119.356	115.395
3-Dimethylallyl-4-hydroxybenzaldehyde	574.244	578.041	581.208	578.066	605.64	689.138	702.702	690.609	719.761	686.095
6,7-Dimethyl-8-(D-ribityl)lumazine	820.018	811.501	809.214	823.738	884.276	1050.41	1106.37	1048.88	1102.49	1036.64
Cinncassiol D1	504.524	486.899	497.543	567.478	590.56	1177.66	1152.43	1137.81	1258.29	1126.05
1-Palmitoylglycerol	4808.34	4808.85	4814.77	4994.2	4963.54	7817.25	7691.24	7730.23	8168.8	7524.4
PPA	857.86	845.924	839.558	853.206	878.315	1027.81	1050.11	1035.38	1098.27	1024.12
N-[(2S)-2-Amino-2-carboxyethyl]-L-glutamate	95.0474	93.8975	92.7749	94.4981	95.5899	128.47	130.991	123.961	136.947	124.024
(S)-2-Hydroxyglutarate	1620.73	1869.85	1913.83	1726.64	1813.85	3003.29	3565.08	3330.63	3474.98	3498.55
6-[[2-[[2-Amino-4-(methylamino)-4-oxobutanoyl]amino]-2-(4-hydroxyphenyl)acetyl]amino]-3,3-dimethyl-7-oxo-4-thia-1-azabicyclo[3.2.0]heptane-2-carboxylic acid	388.589	418.476	406.511	412.027	419.519	566.947	620.812	587.701	606.608	611.156
Ascorbyl stearate	391.67	409.6	403.325	416.862	398.635	582.62	627.113	615.237	649.746	637.884
Methylimidazole acetaldehyde	43.1438	45.2257	45.3849	46.8382	44.1293	131.036	153.582	134.232	150.992	146.346
(5Z,7S,8E,10Z,13Z,15E,17S,19Z)-7,17-Dihydroxydocosa-5,8,10,13,15,19-hexaenoylcarnitine	399.501	417.407	422.403	430.162	437.799	751.603	815.175	754.488	796.588	820.172
S-(2-Furanylmethyl) propanethioate	672.82	675.118	685.211	664.325	701.393	892.823	939.389	915.001	934.548	895.368
Histidyltryptophan	674.796	677.448	662.337	658.759	705.015	866.501	925.408	870.745	911.793	873.5
PE(22:2(13Z,16Z)/LTE4)	54.8135	91.1744	91.6939	66.5176	93.0688	257.484	310.71	236.406	263.623	272.632
Glu Val Ile Glu	1267.57	1461.32	1493.16	1431.62	1595.15	2755.59	3091.66	2806.12	2920.28	2985.34
16alpha-Hydroxydehydroepiandrosterone	806.753	906.084	897.197	850.527	927.701	1384.69	1427.61	1359.94	1333.54	1373.82
N-cis-Feruloyltyramine	325.511	302.525	334.944	326.61	360.275	464.987	509.64	462.314	479.796	469.241
Fosfosal	188.989	196.178	214.658	206.08	222.004	278.279	296.275	278.442	292.131	290.233
Glycerol 3-phosphate	236.412	249.557	240.004	241.054	255.423	294.694	308.811	307.429	303.526	295.701
2-[(Isopropylthio)methyl]furan	24.2805	23.768	25.7608	28.6658	25.0377	59.9957	68.4758	65.2231	68.633	61.4795
Tiglic acid	211.191	209.72	218.701	221.092	224.376	272.013	298.722	292.064	287.427	279.845
Malformin	699.015	665.72	665.522	680.226	633.052	835.479	821.39	813.145	800.465	830.553
(+-)-Carbovir	304.058	282.988	286.798	282.703	265.498	405.508	413.697	405.065	395.986	400.687
Trigoneoside Xb	316.868	315.362	302.238	290.103	249.281	483.956	495.165	485.73	489.481	504.304
Lactapiperanol C	183.682	168.717	174.265	198.221	191.061	276.633	284.917	297.17	296.55	302.265
PC(O-10:1(9E)/0:0)	1009.35	1002.32	1021.28	1045.97	1029.66	1318.32	1290.82	1297.01	1319.06	1352.6
5-trans U-46619	1631.16	1619.35	1629.44	1700.96	1693.34	2196.37	2196.97	2213.64	2269.38	2325.03
3alpha,7alpha,12alpha,26-Tetrahydroxy-5beta-cholestane	6209.8	6196.55	6269.61	6203.22	6223.9	6932.51	7112.58	7105.37	7179.28	7251.41
(2R,3S)-3-Hydroxy-1,1-dimethylpyrrolidin-1-ium-2-carboxylate	407.975	405.71	421.851	406.501	407.052	507.474	520.684	541.637	534.76	525.945
3-Methylsulfonyl-4-piperidin-1-ylbenzoyl guanidine	1734.16	1734.08	1745.07	1724.07	1747.61	1916.33	1922.97	1947.49	1931.23	1928.06
(R)-4-(2-(2-(2-Methylpyrrolidin-1-yl)ethyl)benzofuran-5-yl)benzonitrile	3560.54	3446.62	3463.89	3399.84	3433.4	4313.6	4558.49	4386.95	4585.34	4441.02
L-Pyridosine	331.322	319.291	307.232	325.253	320.786	474.251	518.064	497.234	509.066	481.323
z-Clausenamide	1181.72	1162.29	1131.02	1149.87	1165.47	1425.75	1456.35	1443.31	1459	1402.28
5-[(3As,4S,6aR)-2-oxo-1,3,3a,4,6,6a-hexahydrothieno[3,4-d]imidazol-4-yl]-N'-propylpentanehydrazide	288.953	282.965	278.307	290.755	290.296	460.196	508.839	503.753	515.98	493.701
Metabutethamine	832.155	819.149	802.383	807.936	834.988	1322.03	1389.22	1399.98	1424.94	1373.55
4-Amino-4-deoxyarabinose	4.03e-07	0.0217414	4.03e-07	4.03e-07	4.03e-07	40.9697	45.2394	49.6724	48.7863	45.8682
1b,3a,7b-Trihydroxy-5b-cholanoic acid	13194.7	13085.9	12544.1	12563.1	12815.7	17157.5	18061.4	17358	17968.5	18378.2
4-Thialysine	256.76	258.087	224.318	229.658	244.719	447.267	465.992	463.22	461.922	467.841
DIHYDROJASMONIC ACID	830.359	798.617	732.6	764.507	766.257	1130.22	1150.58	1134.38	1165.99	1157.85
o-Methoxyhydrocinnamic acid	45.9883	44.9081	38.9204	42.3108	38.9394	96.2358	102.478	91.4681	98.8849	100.076
Limonoate a-ring-lactone	440.692	443.84	419.934	425.618	423.252	672.974	671.95	650.974	663.283	689.713
Carcinine	64.523	47.8386	43.31	65.8186	56.1303	273.411	273.824	259.929	292.413	291.581
SM(d18:2(4E,14Z)/6 keto-PGF1alpha)	592.333	542.63	530.581	553.029	547.296	1777.44	1839.95	1720.55	1858.56	1871.35
PG(a-21:0/20:3(8Z,11Z,14Z)-2OH(5,6))	1688.69	1637.44	1628.5	1760.99	1631.43	3138.36	3218.5	3069.27	3218.18	3268.25
cis-3-Hexenyl lactate	1127.11	1135.2	1106.97	1101.15	1113.61	1462.04	1455.73	1437.5	1492.63	1470.96
Spiropiperidine	412.445	485.726	427.574	496.35	395.304	1763.79	1842.97	1638.68	1963.1	1840.04
Acetildenafil	5372.53	5308.3	5390.62	5324.07	5295.5	6697.97	6800.18	6778.26	6924.5	6899.5
(10Z,14E,16E)-10,14,16-Octadecatrien-12-ynoic acid	170.475	168.454	168.824	170.699	168.029	310.801	316.977	320.86	340.455	333.835
Obacunone	284.923	290.419	292.05	284.112	285.701	748.998	809.218	828.891	884.364	832.225
Methyl 2-(10-heptadecenyl)-6-hydroxybenzoate	1.05146	1.45871	0.217328	0.0255422	4.03e-07	245.066	259.156	263.05	297.377	281.656
SM(d19:0/PGF1alpha)	530.744	546.092	504.576	586.786	595.096	1511.71	1515.13	1539.16	1621.16	1609.85
Arginyl-glycyl-aspartyl-valine	335.453	351.168	328.722	357.76	356.927	879.673	898.741	928.768	947.408	964.655
[12]-Gingerol	82.89	90.7103	113.55	96.6319	121.889	861.352	939.92	902.914	967.501	980.984
Sirenin	277.451	266.472	259.689	255.954	268.268	758.888	787.313	762.711	803.926	817.952
PG(i-12:0/i-24:0)	247.821	251.912	238.939	237.485	240.121	1584.93	1674.59	1634.83	1713.66	1703.23
Dihydroceramide C2	4581.23	4562.07	4655.94	4632.29	4640.65	10732	11003.6	10987.9	11282.7	11323.2
1,3,5-Hexatriene	131.273	134.468	126.231	129.026	126.585	540.253	552.417	548.177	563.306	582.899
delta2-THA	48340.8	47577.3	47104.3	46268.1	46417.5	154730	156677	156237	160968	163403
PE(20:1(11Z)/20:0)	7810.72	7920.27	7729.9	7887.85	7696.72	10512.2	10925.3	10848.1	10975.3	10856.9
Lysylserine	545.297	540.774	534.119	546.074	558.878	872.333	912.002	896.008	927.121	900.658
Azitromycin	69.6801	66.7179	72.8474	86.3397	80.9289	709.308	747.14	745.7	808.548	749.707
2-Formaminobenzoylacetate	4140.03	4187.73	4202.94	4085.02	4184.28	5148.15	5321.87	5187.54	5323.17	5205.7
Dibenzo-P-dioxin	959.92	932.023	947.659	927.385	934.351	1271.54	1298.42	1270.62	1314.55	1275.98
cGMP	105.235	103.179	94.1394	91.2421	108.567	328.38	354.652	317.033	357.809	341.211
(S)-(-)-Perillyl alcohol	970.959	960.57	950.302	928.453	946.148	1263.78	1296.35	1270.45	1276.16	1264.06
6-Heptyl-5,6-dihydro-2H-pyran-2-one	167.589	160.81	153.787	164.501	157.485	362.321	385.884	380.123	373.779	381.467
Ser Ser Pro	1757	1738.31	1721.08	1721.73	1752.97	3023.95	3107.52	3072.62	2984.56	3061.51
5-Amino-2,3-dihydro-6-(3-hydroxy-4-methoxy-1-oxobutyl)-2,2-dimethyl-4H-1-benzopyran-4-one	15450.3	15151	14672.4	14585.6	14502	26754.1	27170.2	27011.8	27101.4	26841.6
Lucidenic acid G	5357.68	4994.28	4872.39	4961.94	4801.53	11363.8	11695.9	11695.7	11779.9	11807.5
methoxycatecholamine	1021.9	1001.64	1012.89	1019.67	1010.64	2237.93	2279.3	2256.69	2261.6	2243.42
Desmethyldeschlorobenzoyl Indomethacin	1193.43	1195.22	1191.84	1143.68	1124.87	3621.34	3656.59	3609.83	3678.14	3684.54
3β-HYDROXY-23,24-BISNORCHOL-5-ENIC ACID	9688.82	9499.31	9438.43	9319.73	9337.04	25896.7	26091.6	26344.9	26457.6	26653.1
PE(22:4(7Z,10Z,13Z,16Z)/20:0)	2341.47	2299.6	2358.75	2418.96	2435.06	3228.8	3393.24	3413.89	3370.74	3386.97
PC(20:2(11Z,14Z)/18:3(10,12,15)-OH(9))	4094	4116.16	4297.12	4421.71	4417.67	6880.94	7081.82	7217.06	7172.92	7309.04
12-Hydroxydodecanoic acid	49.3737	54.8378	47.1473	56.1483	59.3496	120.823	133.752	129.073	133.361	130.896
Dehydroepiandrosterone	385.888	376.216	378.325	383.183	400.934	531.83	545.321	553.075	565.376	546.996
Epiheterodendrin	2092.89	2056.94	2031.85	2112.05	2239.87	3116.04	3177.21	3112.5	3228.22	3115.68
3-Methylglutaric acid	614.929	632.01	654.858	650.049	661.849	839.406	839.818	842.34	847.421	836.886
3-Hydroxyisovalerate	51.6038	54.9176	55.6298	57.506	60.885	105.282	115.618	110.745	111.724	107.394
Methyl 4-phenylbutanoate	517.046	521.61	509.856	508.811	531.175	682.978	702.03	700.225	693.17	681.811
1-{2-[(3-Ethylphenyl)amino]-2-oxoethyl}-6-oxo-1,6-dihydropyridine-3-carboxylic acid	705.159	717.803	711.198	696.447	725.616	896.066	908.268	909.028	898.549	882.132
(5S,6S)-6-Amino-5-hydroxycyclohexa-1,3-diene-1-carboxylate	226.59	233.93	228.616	219.339	236.677	405.785	408.058	405.325	405.699	409.428
D-Cathinone	327.309	320.223	319.025	321.328	337.804	545.723	574.756	559.431	556.302	569.191
PA(PGE1/22:0)	1935.78	1953.55	1999.59	2079.01	2068.87	3405.39	3393.54	3428.09	3472.46	3349.96
p-Acetaminobenzaldehyde	416.674	399.992	411.764	417.181	427.863	692.671	693.196	681.264	684.838	669.674
6-Amino-9H-purine-9-propanoic acid	105.289	105.136	107.957	109.883	112.449	305.763	300.17	300.841	310.885	297.342
(-)-Jasmonic acid	64.5055	66.9435	61.8718	65.208	67.3996	190.071	189.674	198.597	188.296	183.264
Lotaustralin	2875.41	2796.03	2659.53	2819.08	2852.35	8580.26	9067.55	8994.51	8929.61	8872.49
Thr Gly Asp Val	753.83	772.694	727.991	760.078	755.778	1392.55	1442.86	1418.29	1421.34	1409.52
3-Hydroxyphenylacetic acid	96.1782	92.3454	90.6379	95.8529	99.0366	243.58	253.257	257.052	252.772	245.953
16,16-dimethyl-PGA1	170.829	181.382	172.243	183.908	194.67	753.973	786.81	802.823	778.356	744.19
Dehydroabietylamine	536.795	556.43	540.674	567.82	540.064	842.482	888.265	908.811	863.754	867.448
Momorcharaside B	6415.27	5810.32	5979.46	5784.95	6071	14118.2	14602.1	15125.4	13691.2	14718.7
Gelcohol	316.345	294.811	297.31	295.768	292.756	781.849	802.317	836.24	798.547	802.069
3-hydroxy-tetradecanoic acid	190.981	178.396	167.386	191.217	179.265	642.926	656.889	671.572	633.441	645.052
Avocadene	336.854	330.546	328.249	324.878	308.71	912.557	935.606	968.189	917.821	927.045
(3b,6b,8a,12a)-8,12-Epoxy-7(11)-eremophilene-6,8,12-trimethoxy-3-ol	2754.39	2639.68	2572.47	2691.97	2600.55	3619.18	3767.45	3808.26	3760.44	3867.41
8,11,14-Nonadecatriynoic acid	107.685	101.29	96.3107	103.039	104.501	186.363	194.028	198.8	194.336	197.346
PC(24:1(15Z)/PGE1)	1184.11	1167.08	1219.11	1252.84	1189.1	1844.41	1830.71	1881.56	1848.29	1891.22
2-thio-Acetyl MAGE	480.868	463.67	464.618	503.443	473.24	933.859	954.842	1015.75	913.306	967.158
3-Hydroxy-4-butanolide	1645.15	1613.3	1609.06	1580.8	1605.4	2017.49	2055.46	2021.63	2073.08	2049.67
Erinapyrone A	53.723	49.1712	50.546	49.9387	49.5076	78.0586	79.9805	79.6382	80.8041	82.8913
1-(3-Carboxypropyl)-3,7-dimethylxanthine	3480.44	3385.55	3393.23	3380.05	3304.84	4376.26	4438.1	4407.48	4528.54	4518.05
16-oxo-octadecanoic acid	7327.92	7197.33	7193.93	7119.34	7116.67	8958.79	8936.43	9081.08	9282.9	9287.21
(+)-Camphor	107.629	96.0226	97.5555	101.27	101.764	167.851	176.376	182.696	179.386	176.225
Arachidonoyl Serinol	1138.95	1103.07	1121.36	1133.51	1165.23	1743.94	1775.7	1817.5	1802.73	1742.16
Oxindole	1797.29	1721.58	1739.98	1736.93	1783.39	2337.15	2375.68	2441.37	2489.03	2486.65
(22E)-3α,7α,12α-Trihydroxy-5β-chol-22-en-24-oic Acid	1375	1330.85	1323.82	1328.38	1355.09	1581.47	1590.42	1602.19	1630.46	1598.74
3,8-Dihydroxy-6-methoxy-7(11)-eremophilen-12,8-olide	291.609	278.536	274.977	270.847	286.645	323.286	321.874	330.257	323.5	320.958
Cer(d17:1/6 keto-PGF1alpha)	901.982	859.851	864.331	832.365	911.695	1216.57	1244.14	1363.89	1258.78	1250.27
2E,7-Octadienal	112.192	105.315	108.427	111.866	111.306	137.474	141.137	146.523	141.359	138.599
Indole-3-ethanol	45.2909	47.4887	40.5834	44.0599	47.148	87.2696	78.9012	82.6428	73.9574	84.8913
Indoxyl glucuronide	1163.36	1178.05	1146.54	1157.39	1187.2	1361.71	1327.52	1362.56	1374.06	1374.95
N-methylphenylethanolaminium	139.503	146.318	129.155	140.019	141.54	202.98	201.257	208.297	208.564	216.29
Stercurensin	393.743	434.494	361.688	380.783	400.317	569.837	549.304	571.661	566.809	586.495
(3xi,5Z)-1,5-Octadien-3-ol	1065.81	1022.66	1016.26	938.395	938.378	1456.47	1463.32	1469.2	1487.89	1475.04
Eremopetasinorol	75.7987	71.881	70.0124	63.0792	62.9894	130.2	137.46	137.255	130.794	138.366
Phyllanthusol B	90.9059	90.2213	92.8963	88.0162	75.3696	200.669	202.914	212.967	197.229	203.569
2,3-Dimethyl-2-cyclohexen-1-one	350.254	344.94	328.321	328.027	326.164	507.418	499.127	501.691	491.598	502.442
MEDICA 16	2419.4	2386.77	2403.1	2322.56	2292.62	4060.17	3955.49	3971.5	3960.95	4154.55
Cetylmannoside	1501.06	1452.22	1433.91	1303.88	1277.86	3388.28	3322.81	3280.31	3312.16	3353.67
5-(Hydroxymethyl)-1H-pyrrole-2-carbaldehyde	87.2813	84.1835	72.6212	70.0018	70.7061	156.658	169.737	166.78	159.446	154.602
1,2-dihydrostilbene	49.891	42.7088	40.109	37.6817	36.796	118.519	134.186	131.385	135.461	128.973
3,6-Dihydronicotinic acid	67.8313	65.6452	62.8462	58.7227	58.4016	119.544	132.652	133.917	130.98	122.969
Risperidone	6239.18	6124.79	5510.28	6023.13	5771.01	8922.73	8692.47	8828.51	8724.28	8642.45
Tetradeca-2,4,6-trienoylcarnitine	133.106	130.092	114.748	126.179	112.284	273.505	271.225	265.267	272.749	246.637
(±)8-GINGEROL	691.303	701.57	674.845	703.511	680.015	906.163	912.38	911.962	922.607	900.049
Vignatic acid B	2343.5	2350.13	2215.71	2290.88	2257.31	3555.17	3571.6	3596.79	3629.61	3454.33
Temiverine	45.774	31.4387	29.7565	36.0376	40.6072	201.651	194.922	191.083	201.673	179.861
Gly His Tyr	115.093	96.6526	96.8262	111.494	118.767	317.126	292.855	296.348	286.749	275.731
Lapachenole	786.745	793.227	795.621	800.361	804.638	1063.63	1021.15	1034.44	1058.68	1028.08
Premazepam	103.964	109.768	87.7125	98.8116	107.342	360.71	337.348	335.822	348.671	340.201
Debenzoylzucchini factor B	1678.59	1646	1615.84	1665.02	1709.92	2705.29	2583.63	2560.9	2647.9	2599.14
Stachyose	1222.56	1158.95	1188.35	1211.76	1200.53	2227.66	2087.91	2097.78	2115.74	2172.34
5-Methyl-5,6,7,8-tetrahydromethanopterin	0.000155225	0.107298	0.000270939	4.59169	0.0721115	400.797	334.435	365.897	362.295	360.818
1-Stearoylglycerophosphoserine	3633.59	3501.36	3589.02	3617.87	3562.78	6754.45	6210.46	6230.86	6373.42	6289.12
4,5-Dioxopentanoate	1671.94	1607.27	1609.83	1622.3	1609.07	4014.54	3819	3851.48	3929.72	3846.49
Aglepristone	26369.6	25863	25523.7	25925.5	25503.2	42418.3	41720.2	41239.8	42360.9	41934.1
LysoPE(0:0/18:1(11Z))	66857.5	64850.3	64743.9	66467.3	64318.9	110889	107558	107956	111140	109766
LysoPE(0:0/15:0)	296334	291040	294217	296902	292396	368724	361425	359864	367139	366013
3',5'-Cyclic guanosine monophosphate	3218.57	2963.74	2996.17	3251.39	3104.33	7082.87	6720.34	6644.14	6973.64	6713.58
Anordrin	362.824	376.078	387.449	354.149	330.689	847.041	836.657	851.566	861.706	847.993
2R-Hydroxymethyl-3S-hydroxypyrolidine	86.5148	88.6635	84.9671	77.2538	76.5949	215.753	218.454	216.762	211.121	218.803
Isoleucyl-Alanine	196.3	192.869	189.21	177.491	188.888	409.148	410.761	403.096	395.72	391.071
Ala Ala Ser Tyr	1824.73	1852.52	1830.6	1760.74	1785.15	5172.54	5090.18	5140.77	5090.68	5026.74
(3S,5R,6R,7E)-3,5,6-Trihydroxy-7-megastigmen-9-one	88.8127	90.6668	93.7928	80.4866	83.9196	316.548	317.47	317.754	312.294	310.643
PS(18:4(6Z,9Z,12Z,15Z)/PGF1alpha)	37.0052	42.938	44.067	26.3047	11.2859	444.931	404.003	425.88	414.991	383.682
3-hydroxytridecanoic acid	534.1	542.226	535.053	538.536	540.308	1075.52	1048.62	1088.31	1051.84	1030.83
myo-Inositol 1,3,4,5-tetrakisphosphate	5181.61	5050.34	5338.19	5398.11	5555.47	11648.6	11087.4	11248.5	11087.5	11202.1
Asperagenin	20279.4	20043	20270.1	20494.7	20590.2	37980.5	38209.9	37433.7	37411	38157.7
Deoxyspergualin	19534.5	19370.2	19489.2	19594.6	19413.1	26754.7	26255.4	25862	26069.3	26312.3
PA(P-16:0/18:3(10,12,15)-OH(9))	15970.3	15548.8	15309.7	15108.3	16081.4	48274.9	47330.4	45256.5	47139.2	46534.6
Asperxanthone	2457.46	2439.12	2414.92	2460.3	2409.91	3551.41	3553.88	3494.32	3568.44	3454.96
NPC	679.456	687.538	707.476	688.08	650.683	1645.38	1591.87	1585.09	1636.25	1558.88
Eremopetasidione	1755.5	1746.86	1755.49	1770.66	1694.53	2804.52	2744.68	2767.74	2839.99	2751.41
Heteroflavanone A	656.094	634.699	663.954	644.542	622.183	1003.63	985.62	967.693	979.875	971.043
LysoPE(0:0/16:0)	601632	592207	596875	598431	591744	749679	739875	732832	743812	741103
Neocnidilide	338.135	333.466	325.953	332.442	327.616	467.839	461.07	458.118	451.34	455.206
Lys-Gln-Ala-Gly-Asp-Val	11814.2	11473.4	11335.1	11581.9	11496	18871.4	18572.2	18564.8	18215.7	18210
[8]-Paradol	262.388	257.493	245.851	255.222	273.897	697.432	658.091	659.732	648.11	683.705
SM(d17:2(4E,8Z)/22:6(4Z,7Z,11E,13Z,15E,19Z)-2OH(10S,17))	9876.26	10050.1	9051.69	10672.4	10628.2	26500.3	25094.1	24919.8	24628	24758.7
Pacific Ciguatoxin 4A	766.046	811.769	886.74	734.815	797.654	2548.84	2441.96	2308.98	2285.13	2321.77
PIP(20:3(5Z,8Z,11Z)/18:0)	675.956	676.048	759.561	675.89	672.486	1551.61	1530.13	1425.3	1486.02	1454.2
(2E,4E,6E,8E)-3,7-Dimethyl-9-(2-nonoxyphenyl)nona-2,4,6,8-tetraenoic acid	735.696	713.773	719.399	685.936	693.949	1336.12	1294.96	1285.88	1319.82	1309.54
4-(2-Aminophenyl)-2,4-dioxobutanoic acid	19016.3	19019.1	19091.8	18884.3	19088.8	22947.7	22915.1	22603.6	22506.2	22587.1
Actodigin	7478.4	7407.51	7374.59	7490.26	7328.98	8408.79	8251.93	8305.23	8284.29	8437.21
Phosphocholine	126.081	123.339	125.404	131.057	122.221	161.037	162.16	166.24	162.459	167.16
2-(2-Ethyl-3H-1-benzofuran-2-yl)-1H-imidazole	24.4721	25.6423	18.5915	28.1741	21.9615	116.802	114.193	119.333	111.708	122.373
Sialyllacto-N-tetraose a	411.448	389.499	387.461	439.177	425.513	694.698	676.103	699.186	673.093	702.871
2-(7'-Methylthio)heptylmalic acid	429.228	408.705	409.128	416.849	399.671	656.423	671.708	630.785	681.44	665.859
hydroxyhexadecenoylcarnitine	5978.45	5875.78	5824.93	5915.15	5754.13	7313.84	7217.94	7120.83	7228.25	7252.45
6,8-Heneicosanedione	767.052	761.154	723.18	756.058	714.353	1056.85	1052.3	1052.33	1073.66	1067.44
trans-EKODE-(E)-Ib	774.544	768.425	741.132	782.865	732.923	1162.72	1163.66	1166.85	1181.41	1195
Creatinine	944.347	913.547	910.48	927.745	906.03	1222.71	1188.18	1224.31	1265.14	1244.1
L,L-Cyclo(prolylalanyl)	132.613	120.388	124.534	124.82	117.19	226.257	212.794	226.761	229.487	231.664
Boviquinone 4	516.568	488.781	463.224	462.571	434.716	972.281	953.327	980.39	1007.88	947.147
3'-Hydroxyamobarbital	1127.59	1071.19	1073.78	1104.09	1053.73	1444.13	1407.73	1438.59	1473.02	1421.14
PG(PGJ2/i-24:0)	7337.48	6795.99	6725.47	6945.33	6526.33	9911.19	9657.71	9615.27	9961.9	9788.53
PI(16:0/21:0)	193.87	185.233	187.617	161.012	170.778	487.34	485.685	523.519	523.395	493.793
14-Deoxyandrographolide	7290.2	7119.7	7009.14	6966.71	6924.04	11345.2	11407.7	11843.5	11562.3	11516.6
Arg-Thr-Lys-Arg	11055.2	10958.4	10885.9	10933	10806.4	15095.5	15146.2	15632.1	15579.5	15431.4
9-Hydroxyhexadecanoic acid	1379.17	1361.74	1376.39	1326.87	1269.21	2342.32	2313.82	2431.16	2381.17	2355.74
tetrazinone	222.357	219.936	221.365	205.107	202.939	406.449	416.147	425.667	420.747	415.059
Galangin 7-rhamnoside	489.266	507.651	488.633	504.117	496.532	773.11	802.515	792.944	815.27	786.968
16(17)-EpDPE	737.269	723.193	731.393	758.911	736.839	1373.57	1394.55	1396.8	1440.89	1347.16
Oligomycin	117.077	108.982	108.902	136.336	132.111	449.588	470.338	469.819	480.143	464.065
Leu-leu-ome	94.1001	103.195	107.99	98.3084	96.1143	500.685	490.298	489.019	527.25	503.824
LysoPE(16:1(9Z)/0:0)	4006.03	4019.92	4097.3	4095.39	4001.14	9631.19	9680.47	9610.52	10306.3	9911.2
PE(22:1(13Z)/LTE4)	991.701	1036.54	1022.74	1036.08	1058.45	2026.91	2016.71	2016.66	2129.29	2042.89
PG(i-22:0/22:6(5Z,7Z,10Z,13Z,16Z,19Z)-OH(4))	1381.83	1468.23	1408.91	1476.04	1481.18	5146.54	5231.75	5315.49	5500.31	5335.08
Methyl 4,7,10,13,16-docosapentaenoate	1152.32	1143.88	1129.93	1139.5	1170.8	3022.56	3073.95	3101.21	3245.84	3122.79
(8E,15E)-1,8,15-Heptadecatriene-11,13-diyne	137.297	137.247	135.073	130.39	129.038	473.704	494.614	495.211	513.351	496.45
9-Pentadecenoic acid	224.64	232.177	234.394	209.296	221.604	710.564	739.316	724.587	749.611	729.505
1-Pentyl-3-(1-naphthoyl)indole	775.342	768.246	787.447	770.232	764.35	1360.88	1421.91	1400.21	1430.29	1404.98
Phenylalanylproline	1149.86	1110.99	1091.08	1097.12	1121.1	1905.46	1925.03	1901.86	1969.05	1902
3alpha-Hydroxy-3,5-dihydromonacolin L acid	504.33	475.051	437.827	482.086	473.176	1642.23	1709.36	1672.45	1729.57	1682.49
L-Tryptophan	118.474	101.534	81.0416	105.16	118.154	409.335	423.44	447.657	430.374	445.031
Dihyroxy-1H-indole glucuronide I	703.513	675.697	670.346	697.144	694.587	1910.94	2049.56	2091.38	2032.97	2084.56
Nitroxoline	495.959	453.004	478.49	480.816	491.521	872.626	878.589	893.484	899.614	904.67
HERNIARIN	191.899	182.835	183.566	181.642	203.541	456.711	458.502	474.05	478.455	466.672
benzoyl-isoleucyl-glutamyl-glycyl-arginyl-p-nitroanilide	55.4003	44.6824	23.5741	68.729	44.4816	559.412	547.592	598.567	570.419	598.337
N-(Dimethylamino)methylene-9-((2-hydroxy-1-(hydroxymethyl)ethoxy)methyl)guanine	1822.94	1764.33	1756.62	1827.5	1791.49	2454.82	2437.87	2466.7	2456.98	2497.7
Tetrahydrocortisone	1479.76	1468.42	1450.04	1517.61	1435.16	3094.12	3133.08	3170.62	3098.88	3231.18
AVOCADYNE	1070.46	1060.81	1034.63	1068.17	1065.2	2375.58	2433.76	2481.27	2402.32	2539.32
Peimisine	1466.59	1454.68	1463.31	1492.77	1533.85	3504.29	3503.48	3479.16	3553.82	3643.72
Arbaprostil	1228.26	1209.22	1181.09	1252.88	1279.14	4574.57	4424.39	4575.28	4484.44	4630.11
Acetone	305.869	310.882	292.191	292.981	294.201	523.886	528.617	534.543	535.064	536.856
4,1-Benzoxazepine	194.104	195.817	172.503	185.07	176.103	479.093	457.655	480.695	479.909	476.15
Caproic acid	327.725	320.164	290.727	295.7	296.872	734.014	727.862	750.706	734.038	735.497
SM(d18:2(4E,14Z)/PGE1)	5467.26	5346.48	5171.16	5242.1	5147.31	9343.9	9309.86	9441.92	9512.65	9358.87
Nandrolone	235.017	223.418	201.575	227.886	204.902	641.354	645.908	651.625	671.282	637.831
(8S,9S,10S,11S,13S,14S,17R)-11,17-Dihydroxy-17-(2-hydroxyacetyl)-10,13-dimethyl-9-nonyl-1,2,6,7,8,11,12,14,15,16-decahydrocyclopenta[a]phenanthren-3-one	34030.3	32459.3	31877.8	33508	31672.3	94577	93341.9	96068.7	98688.3	98437.8
PE(20:4(8Z,11Z,14Z,17Z)/22:0)	26694.5	26319.2	26700.1	27424	25887.2	45016.8	44747.3	45533.9	46090.1	45489.4
Alogliptin	1008.92	996.396	1009.16	974.329	967.645	2008.27	1990.19	2038.27	2100.92	2084.18
Palmitoyl glucuronide	10401.7	10183.2	10287.2	10368.9	10078.4	14720.6	14647.4	14855.6	15140.7	15002.4
Abscisate	47382.2	46558.9	46529.1	45872.9	45987	62777.2	61731.3	62383.1	63259	62615.9
MG(5-iso PGF2VI/0:0/0:0)	163.678	155.189	157.467	154.43	149.326	349.611	341.404	357.863	368.123	354.696
Uridine 2',3'-cyclic phosphate	1609.43	1645.34	1632.75	1660.78	1707.02	3716.87	3609.46	3730	3680.5	3762.83
Islatravir	3454.57	3408.3	3452.39	3528.28	3568.41	5789.33	5635.31	5757.47	5726.99	5824.37
p-Salicylic acid	612.717	625.581	620.76	649.696	647.514	1119.8	1094.92	1134.75	1133.82	1133.62
Cucurbic acid	1897.51	1856.44	1896.44	1928.91	1971.61	3361.55	3269.27	3373.23	3436.5	3390.2
3'-Hydroxystanozolol	3867.49	3899.92	3835.01	3916.99	3847.37	5571.92	5404.42	5468.04	5542.38	5424.7
Dihydrourocanate	128.798	136.366	125.019	137.545	133.494	546.665	525.073	563.488	558.373	539.777
Podophyllotoxin glucoside	796.582	783.472	811.029	777.471	817.287	1555.08	1544.68	1546.38	1578.3	1541.17
(2S)-2-(2-Benzamidoethylamino)-5-(diaminomethylideneamino)pentanoic acid	159.916	192.235	210.452	160.946	214.132	2696.09	2572.83	2469.61	2664.64	2586.91
Imazamethabenz	298.98	315.473	314.144	313.535	329.528	1310.48	1267.57	1270.48	1270.17	1277
Cholylproline	13758.6	13641.7	13774.7	13686.9	13778.4	30124.5	28944.8	28944	28936	29334.7
LysoPC(18:1(11Z)/0:0)	18777.9	19003.2	19069.2	18962.4	19156.8	53753.1	51461.7	50882	51665.7	52300.4
N-[4-[(4-Propan-2-yloxyphenyl)methyl]phenyl]-4,5-dihydro-1H-imidazol-2-amine	358.294	344.64	324.387	337.21	322.563	1066.57	1032.59	1060.6	1040.3	1079.07
Aspartyl-L-proline	309.867	252.14	267.911	269.299	263.246	3029.95	2949.09	3036.47	3029.77	3024.02
mepitiostane	56173.2	54550.8	54077.8	54983	53004.7	138930	136296	137166	138715	137629
7,7-Diethoxy-3-heptene	306.887	303.483	292.499	301.186	291.209	832.483	810.996	821.902	826.914	847.746
N-Palmitoyl GABA	2089.35	2129.54	2132.48	2175.1	2057.92	6344	6054.25	6207.78	6271.02	6292.02
6-Fluoromevalonate	646.957	632.522	604.021	603.502	611.157	2021.41	1975.62	2029.91	1990.98	1971.97
Wortmannin	1003.55	949.899	937.446	960.928	938.065	2437.83	2428.06	2487.69	2463.99	2425.61
Asn-Arg-Ala-Ile	6654.56	6445.37	6436.61	6404.53	6184.39	13328	13232.3	13392.2	13252.7	13219.9
(3R,4R)-4-Amino-1-[[4-[(3-methoxyphenyl)amino]pyrrolo[2,1-f][1,2,4]triazin-5-yl]methyl]piperidin-3-ol	1223.44	1165.68	1156.65	1236.11	1163.07	2963.03	2968.85	3018.52	2970.69	2976.04
Sanazole	36.8704	26.3673	36.1675	39.5144	45.1208	591.942	585.995	603.958	588.067	600.164
1-Hydroxy-2,2,5,5-tetramethylpyrrolidine-3-carboxylic acid	287.955	286.47	294.38	298.721	287.666	1591.19	1605	1622.14	1597.94	1568.8
PC(P-18:1(11Z)/6 keto-PGF1alpha)	549.854	570.39	540.033	559.976	529.034	1591.73	1598.73	1630.16	1597.38	1623.2
Helenalin	770.814	773.795	790.701	765.537	772.657	1897.69	1878.87	1929.85	1932.42	1919.52
Deoxynivalenol 3-glucoside	1734.25	1740.44	1757.88	1702.85	1689.93	4962.87	4961.55	5108.18	5117.56	5010.41
PC(P-18:0/18:1(12Z)-2OH(9,10))	4983.23	4913.55	4979.98	4883.33	4808.22	11212.9	11282	11527	11653.3	11416.7
PS(16:0/22:1(13Z))	2349.69	2404.28	2468.01	2447.72	2428.46	6778.63	6862	6857.12	6913.25	6916.55
PS(18:0/20:1(11Z))	3496.88	3600.62	3621.94	3570.76	3570.11	9535.29	9925.63	9820.07	10007.6	9970.88
L-argininium(1+)	1473.95	1466.48	1478.18	1446.27	1510.44	4457.35	4514.65	4425.43	4493.32	4430.22
13-Hydroxy-9-methoxy-10-oxo-11-octadecenoic acid	1641.48	1683.72	1662.67	1620.27	1621.79	3762.39	3840.62	3846.84	3856.49	3773.78
N1-Acetyl-tabtoxinine-beta-lactam	3.09952	14.3269	8.09512	7.83409	16.6183	1686.82	1723.23	1756.07	1747.55	1728.41
3α-Hydroxy-5β-chola-7,9(11)-dien-24-oic Acid	134.704	124.8	116.646	164.314	170.061	2667.6	2682.39	2706	2698.92	2661.37
Scopolin	1594.27	1591.01	1566.94	1612.07	1594.41	8997.79	8961.02	9041.27	9200.05	9035.46
7(S),17(S)-dihydroxy-8(E),10(Z),13(Z),15(E),19(Z)-Docosapentaenoic Acid	4415.74	4341.73	4344.71	4324.32	4348.22	9865.14	9892.71	9951.87	10046	9914.02
Ciprostene	6548.36	6595.26	6502.34	6589.51	6419.59	21558.3	21532	21601.8	22513.8	22034.4
7-Ketodeoxycholic acid	64522.5	62958.4	62957.9	64339.1	63392	129206	129021	129786	134387	132051
(S)-2-Aceto-2-hydroxybutanoate	3188	3103	3092.56	3067.19	3107.76	6409.97	6486.35	6408	6618.9	6516.37
7a-Hydroxy-3-oxo-4-cholenoic acid	999.608	1000.19	980.106	986.228	980.748	3966.29	4018.02	4022.31	4215.39	4086.91
Vellein	1355.82	1271.01	1196.48	1332.88	1258.7	4904.12	4997.32	5032.6	5118.75	5071.05
3-Pyridinecarboximidamide, N-(2-hydroxy-3-(1-piperidinyl)propoxy)-	2968.08	2940.97	2933	2940	2911.41	6324.66	6336.09	6395.21	6436.99	6428.82
Cyclooctatin	107.138	96.866	99.536	97.603	99.3082	587.472	595.134	595.38	604.908	600.838
1-(4-O-beta-D-glucopyranosyl-3-methoxyphenyl)-3,5-dihydroxydecane	25494.2	25447.7	26738.7	27549.9	26698.1	127586	128413	128673	130553	131983
N-Acetylsphinganine	2084.21	2066.48	2102.93	2136.6	2074.09	4397.04	4358.81	4373.2	4454.79	4437.32
3α,7α,17α-Trihydroxy-5β-cholan-24-oic Acid	42125.9	41655	41352.3	40566	40794	199439	198432	198528	203516	205285
PC(DiMe(11,5)/MonoMe(11,3))	3687.39	3691.41	3576.38	3681.34	3670.91	11602.5	11489	11567.8	11790.3	11706.9
N-Arachidonoyl Histidine	14751.3	14822.1	14436.9	15123.6	14770.2	84423.4	83446.7	83547.1	86337.2	85654.5
trans-S-(1-Propenyl)-L-cysteine	4743.84	4629.23	4625.4	4660.76	4623.78	30197.7	29957.7	30036.7	29963.3	30268.3
Cryptomeridiol 11-rhamnoside	324.472	313.822	305.937	334.016	325.118	1649.14	1631.25	1620.73	1626.18	1661.79
1-heptadecanoyl-glycero-3-phosphate	55053.9	54004.6	53370.3	56208.8	54870.9	116984	118348	116840	118891	118916
Octadeca-9,12-dienal	1319.52	1372.97	1304.88	1403.28	1385.35	4612.11	4629.03	4554.87	4631.02	4623.26
N-Stearoyl Glutamine	24266.6	24163.2	23708.3	24231.1	24136	33455.4	33328.2	33503.2	33708.4	33739.5
7a,12a-Dihydroxy-3-oxo-4-cholenoic acid	6546.35	6403.09	6360.37	6602.06	6471.42	15396.5	15217.5	15388.3	15343.6	15414.2
LysoPA(0:0/16:0)	27068.7	26806.7	26237.4	27290.5	26800.8	60084.5	59664.6	60439.1	60730.1	60316
Arginine ornithine	1276.35	1252.04	1248.5	1271.59	1271.47	2969.27	2968.77	2953.36	3013.7	3001.45
5-Acetamidopentanoate	1242.63	1204.21	1173.52	1227.36	1215.81	3086.62	3033.78	3033.1	3117.03	3094.91
20-ethyl-PGE2	5825.62	5732.81	5746.41	5801.64	5679.77	9903.14	9826.15	9721.64	10023.6	9887.57
L-Oleandrosyl-oleandolide	13771.4	13573.9	13502.4	14023.4	13623.4	32797.9	31838.3	31969	33365.2	32992.5
PC(18:1(9E)/0:0)[U]	14931	14746.1	14731.8	15048.2	14895.5	52730.8	51324	50889.1	53322.9	53070.1
13(R)-HODE	8104.62	8006.39	7947.11	7994.12	7948.47	15773.3	15629.5	15903.8	16178.3	16028.9
Withanolide	5037.59	5017.44	4965.54	5056.83	4878.37	12306.5	12233.7	12317.4	12613.2	12432.4
Phenylpropanoate	123.764	123.281	123.865	130.467	129.649	553.716	552.757	559.42	575.483	571.091
6α-methylprednisolone	4586.93	4612.96	4592.92	4632.06	4665.75	9823.12	9649.65	9672.6	9909.74	9896.46
PGP(i-12:0/PGE2)	12213.1	12077.1	12408	12480.7	12367.3	35108.6	34121	34746.1	35886.9	35445.8
Erinapyrone B	176.824	161.471	159.012	151.503	166.141	294.936	296.531	300.674	296.411	306.534
2-Acetylfuran	199.732	185.202	184.941	185.669	192.99	295.505	291.696	309.851	308.762	312.75
MG(0:0/18:3(6Z,9Z,12Z)/0:0)	4177.07	4068.66	4070.84	4044.76	4137.97	5610.83	5640.84	5713.71	5788.07	5841.88
9-Undecenal	278.002	265.944	252.754	268.703	268.31	370.877	382.649	382.291	394.238	386.85
Traumatin	165.577	158.993	149.167	165.024	158.975	273.248	284.935	277.267	285.46	280.029
Desacetyllevonantradol	5703.59	5565.22	5516.58	5642.83	5618.75	6884.91	6804.8	6803.84	6873.01	6856.95
1-pentadecanoyl-glycero-3-phosphate	6024.7	5860.27	5714.96	5947.88	5845.67	7465.88	7304.83	7422.49	7470.82	7444.28
(25R)-3beta,4beta-dihydroxycholest-5-en-26-oate(1-)	32146.3	31007.7	30848.3	31405.9	30995.4	39387.8	39166.6	39883.2	40181.6	39651
(9Z,11E,13E,15Z)-4-Oxo-9,11,13,15-octadecatetraenoic acid	2003.05	1934.36	1860.4	1967.12	1872.11	2990.68	2994.89	2990.49	3030.01	3027.16
(3beta,17alpha,23S)-17,23-Epoxy-3,28,29-trihydroxy-27-norlanost-8-en-24-one	64390	63408.9	62831.7	64023.9	62910.7	78353.3	77866.1	79087.9	78577.8	78356
MG(15:0/0:0/0:0)	5355.37	5245.5	5112.27	5332.44	5203.21	7297.41	7251.64	7345.67	7321.45	7337.82
Castanospermine	203.347	225.094	210.963	193.687	226.27	271.137	283.719	273.132	277.473	285.98
ALPINETIN METHYL ETHER	3781.78	3853.27	3861.85	3717.67	3832.81	4200.4	4226.51	4259.1	4270.54	4243.62
Octadeca-2,4-dienedioic acid	750.703	810.562	783.306	751.596	808.18	977.46	986.871	973.697	982.121	956.752
N-(gamma-Glutamyl)ethanolamine	727.762	771.519	736.394	723.551	718.623	862.568	877.987	878.4	880.433	907.625
5-Ethyl-3-methyl-2E,4E,6E-nonatriene	54.6313	67.2645	62.5261	56.5284	56.2201	99.822	107.412	97.3196	96.72	107.428
Alliofuroside A	62.0024	73.0402	69.7241	40.5077	62.946	138.535	149	132.021	147.749	161.395
2-Amino-9-[4-hydroxy-2-(hydroxymethyl)butyl]-3H-purin-6-one	82.1585	89.4479	75.9122	67.469	84.2885	148.027	164.78	161.007	169.691	172.726
Dihydrocaffeic acid 3-O-glucuronide	675.462	691.765	687.639	673.1	687.901	758.665	766.027	757.065	762.661	768.197
3-Carboxy-4-methyl-5-propyl-2-furanpropionic acid	338.774	351.446	369.485	334.351	362.599	505.001	489.526	489.558	434.528	479.772
Methyl Heptadecanoic acid	34.1192	33.7701	39.3981	32.1949	38.8995	50.9101	57.8326	55.607	51.6547	52.2645
3-Sulfinylpyruvic acid	95.2545	96.625	102.784	89.5993	111.918	193.461	217.755	199.912	176.303	175.83
1,3-Dimethyluracil	604.517	587.183	607.82	595.512	624.675	754.546	781.19	756.186	736.238	736.361
2-Methyl-1,3-cyclohexadiene	150.827	148.465	156.064	155.584	153.008	193.002	199.726	199.54	193.633	188.353
(1S,2S,4R,8R)-p-Menthane-1,2,8,9-tetrol	49.0908	52.6249	42.2691	57.7747	53.479	118.935	121.596	120.247	108.477	102.924
Icaridin	1208.81	1210.37	1238.39	1266.89	1229.58	2214.5	2174.36	2215.03	2100.05	2041.23
Levan	358.462	364.873	355.23	370.583	371.322	707.358	743.187	691.783	670.568	660.474
Salicylic acid	292.343	295.822	276.582	298.802	293.871	447.022	459.762	452.414	435.509	428.619
Polymyxin M	88.1628	116.089	64.4908	119.86	72.7428	734.382	769.469	724.305	711.915	680.864
Thalictroidine	24.2344	25.4151	24.8076	28.5837	25.3993	41.147	40.9167	41.3357	38.8034	37.6449
(3b,20R,22R)-3,20,27-Trihydroxy-1-oxowitha-5,24-dienolide 3-glucoside	190.874	181.191	181.885	205.113	184.565	331.298	335.812	334.979	315.045	321.162
(S)-10,16-Dihydroxyhexadecanoic acid	420.901	408.541	415.75	429.209	401.928	610.331	603.933	608.592	602.588	596.395
3-[4-Hydroxy-3-(3-methyl-2-butenyl)phenyl]-2-propenal	707.903	701.017	695.188	716.038	703.775	856.283	870.786	870.581	866.448	851.246
PS(14:0/15:0)	1169.35	1148.84	1125.91	1176.81	1154.93	1630.93	1595.41	1660.77	1564.05	1559.36
Crispane	380.56	370.159	371.588	380.575	385.962	544.766	532.653	542.674	532.765	521.722
L-Anticapsin	266.546	248.14	244.976	252.132	246.601	390.376	417.633	410.372	359.339	386.42
N-[2-(3,4-Dihydroxyphenyl)ethyl]icosa-5,8,11,14-tetraenamide	940.317	935.216	978.103	953.01	931.58	1582.4	1638.27	1660.16	1451.24	1549.21
fluvoxamino acid	383.068	367.056	351.348	356.834	370.618	491.242	512.661	519.916	481.768	499.073
L-Pyroglutamyl-L-histidyl-3,3-dimethylprolinamide	783.271	772.35	723.364	741.253	730.848	1003.22	1051.63	1058.68	1035.12	1024.04
2,5-Dibenzyl-3-hydroxy-6-methoxypyrazine	577.777	566.485	554.705	535.272	539.434	781.948	854.979	843.043	822.655	808.281
3-Hydroxyneogrifolin	1668.26	1691.45	1758.22	1683.19	1713.08	2252.2	2212.55	2262.86	2097.1	2241.08
Ganoderiol G	777.347	755.05	787.927	753.978	755.064	990.005	965.029	1010.18	955.662	992.308
(2,6-dihydroxy-4-{4-hydroxy-7-methyl-11-oxo-2,8-dioxatricyclo[7.3.1.0??,????]trideca-1(12),3,5(13),6,9-pentaen-3-yl}phenoxy)dihydroxyoxo-λ??-sulfanylium	62.1039	65.9816	70.0453	61.2511	68.2745	123.247	119.251	125.921	112.553	121.538
Andrographolide	110.293	112.976	115.684	101.234	105.566	201.071	200.153	206.02	184.414	200.547
1-octen-3-hydroperoxide	94.0981	104.219	97.7358	100.642	105.436	192.219	187.374	197.595	180.126	192.337
Glechomanolide	118.594	122.387	114.108	112.658	123.779	217.013	215.401	220.555	207.074	220.865
1,4,5-Naphthalenetriol	83.3379	79.9517	76.4268	83.7449	77.1526	228.819	230.406	227.593	198.294	233.505
PC(2:0/LTE4)	195.546	184.123	182.887	170.763	184.506	524.898	525.821	521.698	470.955	546.985
(3beta,5alpha,9alpha,22E,24R)-3,5,9-Trihydroxy-23-methylergosta-7,22-dien-6-one	2342.32	2377.17	2349.13	2367.83	2328.74	3165.12	3202.76	3237.32	3129.34	3170.98
Taps	166.518	169.391	164.689	170.032	157.584	263.242	269.556	266.408	254.366	269.114
Tyrosylhydroxyproline	416.021	424.408	395.45	377.572	400.795	740.89	765.786	741.971	695.076	694.582
Faradiol myristate	283.215	284.302	337.468	282.436	394.04	1910.23	1762.45	1809.45	1487.21	1619.99
N,N'-Diacetylhydrazine	33.5384	31.778	32.5687	34.8384	33.9155	90.9809	87.1614	89.8301	79.1065	85.1908
Fluoromisonidazole	247900	242622	239573	237778	242554	289383	285195	282734	284880	285962
Americanol	920.516	898.91	904.587	857.836	864.084	1290.87	1279.93	1268.36	1224.22	1290.33
beta-D-Gentiobiosyl crocetin	187.629	182.085	192.595	200.048	187.063	392.824	387.141	364.049	363.719	386.799
Acromelic acid A	3310.32	3361.5	3279.18	3266.11	3353.04	4062.83	4111.58	4051.97	4043.22	4063.4
PG(a-15:0/6 keto-PGF1alpha)	106.063	113.131	101.127	109.626	104.758	193.329	185.799	193.66	185.777	197.699
(R)-3,4-Dihydro-2-methyl-2-(4,8,12-trimethyl-3,7,11-tridecatrienyl)-2H-1-benzopyran-6-ol	1495.06	1467.51	1435.99	1495.29	1459.43	2003.41	2003.49	2043.69	2008.34	2056.1
Apratastat	1349.87	1340.87	1276.91	1336.29	1347.27	1942.35	1933.51	1945.34	1940.47	2023.03
(2E,4E)-5-[2-Methyl-2-(1,1,4,4-tetramethyl-1,2,3,4-tetrahydronaphthalene-6-yl)cyclopropyl]-3-methyl-2,4-pentadienoic acid	1333.52	1349.46	1321.05	1271.89	1271.34	7258.8	6791	7132.75	6872.73	7665.17
(22E)-3α,6β,7β-Trihydroxy-5β-chol-22-en-24-oic Acid	12947.6	12687	12678.5	12668.9	12650.1	29804.8	29417.6	30489.1	30582.4	31764
PI(6 keto-PGF1alpha/20:4(5Z,8Z,11Z,14Z))	71.0793	77.5596	79.8403	78.4939	52.6847	234.593	249.955	223.673	213.972	241.959
AMC Arachidonoyl Amide	3430.38	3391.47	3495.82	3435.87	3325.24	4558.18	4632.38	4606.3	4526.58	4718.29
2,6,6-Trimethyl-1-cyclohexen-1-acetaldehyde	453.152	451.552	447.158	433.988	422.169	698.219	741.13	719.016	692.854	742.693
20-HETE-d6	1390.98	1381.94	1426.9	1362.92	1331.21	1979.35	2064.65	2077.26	1953.61	2084.57
Secologanin	4.03e-07	4.03e-07	4.03e-07	4.03e-07	4.03e-07	88.6115	105.9	88.5726	89.6172	115.229
2-Propylglutaric acid	59.6722	60.1214	61.8574	61.2256	66.7529	112.052	116.919	106.628	112.869	116.814
8-iso-16-cyclohexyl-tetranor Prostaglandin E2	326.169	293.015	299.335	323.996	342.708	810.22	805.688	791.726	791.926	848.21
1α-hydroxy-24,25,26,27-tetranorvitamin D3 / 1α-hydroxy-24,25,26,27-tetranorcholecalciferol	250.994	253.044	248.685	254.843	278.07	458.567	456.305	452.619	455.471	492.954
PS(MonoMe(13,5)/MonoMe(11,5))	1548.95	1573.2	1493.01	1578.36	1560.94	1821.09	1949.94	1754.36	1780.35	1841.65
MG(6 keto-PGF1alpha/0:0/0:0)	1480.11	1475.79	1551.52	1495.77	1571.3	1807.86	1927.46	1689.25	1757.8	1775.35
5-Butyl-1,4-dioxan-2-one	49.6607	52.9327	59.5661	59.4963	62.8691	80.2959	91.3488	73.7601	73.9601	80.1826
(1S,2S,3S,4R)-3-(1-Acetamido-2-ethylbutyl)-4-(diaminomethylideneamino)-2-hydroxycyclopentane-1-carboxylic acid	3001.43	3270.55	3316.32	3117.99	3250.6	3656.95	3897.47	3627.17	3854.79	3851.95
Cholylalanine	1328.3	1381.44	1478.19	1422.1	1386.52	1677	1767.96	1563.61	1674.85	1700.91
4-Methyl-1H-pyrrole-3-carboxamide	145.056	147.117	151.481	149.519	150.761	164.399	165.801	157.934	164.075	165.648
Suillin	3221.03	3348.76	3414.97	3346.86	3448.26	3780.99	3881.13	3794.53	3703.93	3784.96
DG(11M5/13D5/0:0)	519.352	529.334	539.488	619.031	564.841	700.925	818.581	748.938	669.32	724.018
8-Methoxykynurenate	173.839	152.207	166.122	181.033	170.487	212.206	228.873	213.117	209.55	211.94
Ecdysone	2126.4	2077.5	2031.23	2178.73	2155.93	2470.17	2461.21	2444.84	2321.87	2390.84
Glyceryl methylmethacrylate	113.272	117.556	122.27	123.938	128.616	137.298	145.189	152.377	143.803	141.184
Asparaginylhistidine	52.8515	54.3936	57.0047	60.6369	62.594	75.1604	74.4606	83.2245	69.4674	72.7607
1-Cyclohexene-1-carboxylic acid	18.947	18.7967	19.4638	18.3704	20.4246	24.5313	28.4545	30.4393	23.3878	26.6783
Citric acid	87.6284	90.3899	92.6803	97.4192	105.671	113.423	133.283	133.161	110.316	121.652
Nalpha-Cinnamoylhistamine	706.617	731.008	747.868	737.694	846.241	896.733	965.006	963.957	858.543	906.968
4-Carboxy-2-hydroxy-6-methoxy-6-oxohexa-2,4-dienoate	170.599	179.089	191.44	184.251	226.987	242.026	268.273	267.633	227.041	239.342
Danielone	236.941	231.046	244.509	259.243	297.555	304.693	351.583	340.335	308.312	328.914
1-(beta-D-Glucopyranosyloxy)-3-octanone	3132.13	3221.13	3385.89	3328.65	3775.97	4300.98	4565.49	4467.3	4164.13	4437.77
Proclavaminic acid	307.602	309.587	324.594	323.946	363.05	401.253	429.969	421.994	386.111	405.744
Osmundalin	775.104	766.093	811.008	802.088	924.408	1022.1	1139.35	1081.4	978.587	1060.83
Hexamethylpropylene amine	4.03e-07	4.03e-07	4.03e-07	4.03e-07	4.03e-07	13.9907	18.7144	14.5532	8.54488	9.04771
Verbascose	39.8924	49.3736	43.8876	37.0887	40.0078	161.042	178.092	176.348	132.513	133.175
Threonylproline	8.27563	0.00398746	3.52026	0.00244008	1.08615	40.7631	44.7762	44.1755	32.8572	22.9468
Stanozolol	112.016	106.521	103.343	114.208	105.292	185.057	185.871	192.142	156.258	153.421
L-Ornithine	172.426	187.503	188.312	181.676	198.475	324.63	345.25	307.711	296.539	283.308
5-Hydroxyprimaquine	1384.14	1480.66	1436.51	1470.06	1536.77	2082.18	2368.54	2155.4	1939.14	2002.33
PE(22:0/PGJ2)	524.071	448.921	455.502	468.313	514.712	779.437	824.056	730.551	709.194	658.064
1-Hydroxy-6-methoxypyrene	255.687	262.818	254.33	246.357	262.413	323.417	338.145	326.353	321.378	313.777
N-[(5-Hydroxy-2-pyridinyl)methyl]adenosine	1157.59	1158.69	1113.03	1095.64	1168.11	1497.59	1526.76	1470.79	1471.82	1457.19
Fluocinolone	1570.83	1543.45	1488.81	1524.03	1583.69	1946.46	2004.19	1967.45	1960.47	1895.33
(S)-2-Hydroxypropylphosphonate	322.404	320.909	340.306	329.377	352.679	399.107	401.675	380.076	372.957	377.055
TMB (hydrochloride hydrate)	1289.77	1319.54	1371.36	1348.15	1486.99	1598.72	1655.99	1584.26	1537.78	1528.37
(all-E)-1,7,9-Heptadecatriene-11,13,15-triyne	621.292	609.96	645.155	633.42	683.669	785.632	831.061	759.868	751.535	753.461
3-methylsulfinylpropyl-glucosinolate	3762.04	3671.38	3785.51	3925.5	4142.16	4548.09	4666.37	4427.17	4369.84	4388.77
Capsidiol	1886.48	1883.62	1952.71	1984.99	2103.59	2283.33	2357.71	2272.48	2270.72	2204.82
Ginsenoyne J	116.426	118.276	135.017	122.652	139.027	172.61	178.453	170.613	146.793	156.328
3-Hydroxy-6,8-dimethoxy-7(11)-eremophilen-12,8-olide	538.342	557.163	564.847	563.925	610.678	662.988	712.338	677.945	626.4	644.601
UMBELLIFERONE	1403.85	1391.32	1523.84	1409.88	1599.24	1806.44	1798.98	1663.68	1699.95	1781.62
2,3-Dihydro-6-methoxy-2,2-dimethyl-4H-1-benzopyran-4-one	883.356	889.741	939.331	939.683	1012.82	1116.21	1118	1063.12	1043	1085.49
[2-(2-Methylphenyl)-1,3-dioxolan-4-yl]methanol	2365.13	2356.51	2409.58	2440.93	2600.28	2978.95	2938.87	2817.38	2783.31	2901.97
2,4-Dihydroxy-6-pentylbenzoate	102.118	90.7096	98.4081	112.443	132.851	156.549	166.381	144.798	135.33	148.517
Cyclo(aspartylleucylthreonylvalyltyrosylphenylalanylglycyl)	162.195	155.491	150.17	161.994	167.805	211.602	219.541	194.468	191.261	206.895
3-Iodo-L-tyrosine	1181.05	1182.91	1171.17	1158.75	1320.06	1495.82	1605.95	1501.99	1423.32	1466.82
2-Maleylacetate	431.834	410.908	424.7	426.673	471.737	565.261	573.947	534.18	518.854	524.006
5-Deoxydiplosporin	2191.5	2178.51	2269.92	2251.2	2405.92	2789.27	2793.48	2686.54	2537.45	2643.77
Ziziphin	6757.46	7168.56	7524.18	7613.52	7853.18	8754.98	8554.19	8234.25	8666.68	8444.91
Confertifoline	1636.62	1670.59	1709.16	1719.03	1803.38	1870.28	1887.78	1839.36	1846.84	1863.33
O-Desmethylvenlafaxine glucuronide	1177.15	1280.44	990.728	1528.5	1599.89	1905.87	1948.18	2152.24	2056.78	2062.65
Benzofuran	17.451	17.5386	15.933	23.3586	21.1247	26.0816	26.7847	26.7325	25.9441	28.7353
Niazinin	109.86	104.412	116.688	128.3	134.051	161.787	148.332	165.02	174.25	174.557
Indole-3-carboxylic acid	180761	180337	182905	188860	188666	200093	196510	195882	201730	200644
2-Chloro-L-phenylalanine	65284	64524.4	65990.8	69912.2	70352.3	77229.9	75925.3	75915	78213.8	78256.8
2-Propenamide, 3-(3,4-dihydroxyphenyl)-	23026.7	22778.9	23312.5	24352.9	24620.2	27176.7	26607.9	26699.5	27339.7	27412.9
PA(20:3(8Z,11Z,14Z)-2OH(5,6)/18:1(11Z))	32657.1	33313.5	35129.5	37923.4	36871.2	39118.3	40715.6	42132.7	41687	41707.9
PC(P-16:0/18:3(10,12,15)-OH(9))	14691.6	15136.6	15974.3	17792.1	18284.2	19795.7	19783.3	20048.8	21863.7	21716.1
PS(14:0/PGE1)	2078.05	2285.71	2147.08	2399.22	2473.56	2550.87	2687.13	2677.72	2788.26	2765.39
D-Xylono-1,5-lactone	3155.1	3021.25	3058.5	3146.81	3141.34	3249.5	3182.42	3217.83	3264.36	3268
5-Hydroxy-2,4-dimethylthiophen-3-one	323.773	311.82	301.716	316.306	332.198	373	334.85	357.874	370.336	387.801
Heptane-1-thiol	75.4351	68.0052	73.7636	74.577	80.2168	89.5576	81.4827	86.9052	91.4185	96.5617
3,5,7-Trimethyl-2E,4E,6E,8E-decatetraene	272.906	262.866	272.446	278.972	287.451	315.53	301.785	325.332	300.497	344.595
Oxidized Latia luciferin	160.849	150.089	162.911	171.74	167.264	197.245	197.908	204.42	199.182	214.748
PGDM	191.775	190.157	212.447	227.818	223.477	296.481	277.43	295.432	293.816	319.011
(±)-Anisoxide	98.2136	94.8471	100.83	98.5787	108.466	132.72	126.272	134.989	123.024	138.125
O-Ureidohomoserine	130.362	130.791	134.442	136.599	140.581	158.268	153.597	160.663	154.335	159.316
4-Hydroxy-2H-pyran-3-carboxaldehyde	244.342	232.287	235.944	254.651	250.897	294.854	269.307	302.463	283.214	289.8
PS(20:1(11Z)/22:2(13Z,16Z))	1213.91	1147.14	1132.48	1162.89	1274.72	1409.02	1360.96	1470.46	1416.08	1435.98
Paraldehyde	396.479	382.599	371.421	386.782	410.846	441.126	428.489	465.203	464.218	488.914
n-docosahexaenoylethanolamine	23690.4	23087.3	23236.4	23668.9	23958	25190.6	24887.4	25502.4	25595.8	25897.7
L-Metanephrine	3884.12	3709.01	3656.26	3887.81	3969.7	4563.21	4498.95	4711.93	4690.97	4650.55
3alpha,7alpha,12alpha-Trihydroxy-5beta-cholestan-26-al	76115.2	72968.4	72372	74738.7	75978.5	85576.7	84756.8	86960.3	86186.8	87597.8
6-Hydroxy-4-heneicosanone	396.271	369.92	382.902	415.69	386.426	430.654	458.502	479.756	459.539	514.278
Styrene-cis-2,3-dihydrodiol	528.659	535.913	535.228	563.943	538.237	593.2	597.386	615.646	613.656	615.454
Hercynine	91.3445	92.432	92.2874	99.2539	91.6373	105.402	116.783	113.314	111.124	116.6
N-omega-propyl-L-Arginine	164.206	162.13	172.227	168.248	171.143	175.38	189.529	202.28	198.079	196.557
20-COOH-Leukotriene B4	659.441	645.329	661.025	666.301	620.673	725.116	747.271	762.147	775.849	776.409
Cerulenin	209.422	201.387	206.947	208.443	204.42	234.823	225.8	248.979	250.64	250.623
Tetranor 12-HETE	127.119	121.116	117.53	123.385	122.639	133.652	138.587	149.701	134.379	142.829
MG(0:0/15:0/0:0)	265.231	224.437	208.78	249.56	278.985	625.51	856.155	1175.35	979.731	787.915
PS(20:0/22:6(4Z,7Z,10Z,13E,15E,19Z)-OH(17))	147.566	135.997	164.438	150.516	154.436	246.034	285.504	342.418	274.123	291.382
Phenylalanylglutamine	1252.74	1258.18	1213.65	1263.39	1262.12	1286.39	1345.94	1341.53	1323.76	1322.84
Pristanoylglycine	434.595	434.023	422.404	453.226	466.771	522.965	542.856	579.951	530.88	578.1
SM(d18:1/20:5(5Z,8Z,10E,14Z,17Z)-OH(12))	6987.63	6947.76	6793.53	6844.44	7103.08	7406.12	7483.24	7624.07	7487.74	7678.91
dihydrosterculate	36.692	48.0786	40.1103	38.4672	37.3439	120.906	135.167	135.145	116.503	134.162
Dihydrosinapic acid	284.053	293.053	276.126	290.732	290.866	347.025	365.464	373.504	355.473	360.542
3-Hydroxydodecanoic acid	111.922	114.336	111.061	117.207	117.622	133.677	141.744	141.324	135.702	142.691
DG(18:2n6/0:0/22:5n6)	8598.3	8862.91	8814.99	8952.35	9416.97	10072.2	10726.5	10788.2	10073.4	10936.7
19-Nor-17alpha-pregn-5(10)-en-20-yne-3alpha,17beta-diol	179.043	176.728	166.917	182.473	187.314	216.811	235.556	240.704	209.655	227.741
1-Acetyl-3,14,20-trihydroxywitha-5,24-dienolide 3-glucoside	11964.5	12069	10807.7	12014.5	12186.7	14635.9	14231.2	13723.4	14123.2	15700.7
Isopersin	1531.52	1590.66	1355.1	1548.71	1506.36	1775.85	1892.84	1824.54	1746.76	2136.01
13-Heptadecyn-1-ol	53.3801	59.1564	55.1641	54.9741	51.7789	61.4811	62.8257	64.83	66.2704	74.7619
Fluperlapine	52.6425	14.3274	11.9783	40.2835	8.55171	101.225	91.3747	116.551	131.515	191.831
Gluconolactone	133.062	126.48	132.79	130.154	130.667	146.169	151.757	153.035	164.652	176.579
N-Eicosapentaenoyl Tryptophan	11109.7	11130.1	11228.2	11222.5	11310.5	11448.6	11788.3	11485.1	11749.4	11791.3
2-(2'-Methylthio)ethylmalic acid	858.599	858.801	868.585	889.412	857.939	951.427	1051.21	942.947	1032.89	1052.25
Thioetheramide-PC	2060.48	2109.77	2137.67	2161.96	2176.06	2305.49	2388.11	2464.95	2352.01	2474.72
2-hydroxyethinylestradiol	870.907	871.269	889.553	856.607	884.511	908.463	936.979	944.362	959.67	944.459
9(S)-HpODE	512.646	516.101	521.355	513.481	513.381	563.198	564.527	575.258	589.598	577.836
PE(18:0/PGJ2)	1605.6	1662.08	1824.96	1797.27	1732.65	1883.66	1893.43	1903.29	1965.94	1992.46
Eicosapentaenoic Acid ethyl ester	443.898	436.744	484.751	476.239	467.389	501.949	513.04	509.407	534.285	542.751
(20E)-Ginsenoside F4	4781.72	4934.22	5334.7	5705.52	5673.62	7579.41	7354.16	7668.91	8236.18	9288.3
Tetradecenoylcarnitine	15572.3	15318	15578.9	15807.2	15946.5	16866.6	16952.1	17446.3	17823.7	18202.9
Panaxydol linoleate	31930.7	30750	31399.1	32157	33420.7	37633.8	37637.5	39118.3	40850.7	41497.4
25-Acetylvulgaroside	5751.52	5657.19	5758.58	5977.18	5878.93	6343.9	6336.05	6367.93	6606.41	6608.56
(S)-Homostachydrine	274.632	267.37	265.276	282.74	281.337	307.724	321.502	317.582	335.501	358.791
Tropolone A	175.561	161.592	185.837	178.716	191.939	225.887	213.563	226.872	228.7	250.095
PIP(20:2(11Z,14Z)/20:3(6,8,11)-OH(5))	833.498	830.393	860.305	839.217	897.592	1075.58	963.01	1019.42	1055.47	1151.06
6,8,10,12-pentadecatetraenal	113.793	111.782	114.1	118.312	116.415	128.156	123.599	128.379	125.073	130.371
N-Acetylhistidine	31.7806	29.3718	31.492	34.2481	33.9272	43.9696	40.6237	42.315	43.5857	47.7704
Diethyl 2,4,6-trimethyl-3,4-dihydropyridine-3,5-dicarboxylate	66.8785	52.2917	53.3078	50.757	52.9114	74.2504	71.9195	66.4594	71.3292	65.885
Queuosine	1196.34	1165.5	1155.79	1108.87	1149.77	1277.96	1253.76	1235.39	1239.25	1217.01
2-Amino-9-[(2R,4S,5R)-5-(hydroperoxymethyl)-4-hydroxyoxolan-2-yl]-1H-purin-6-one	7636.42	7527.7	7571.57	7563.78	7636.14	8051.48	7983.61	7826.79	7877.14	7858.61
Salicylate	701.731	663.715	670.279	663.032	692.329	793.099	787.525	772.022	757.404	793.813
2-Methyl-3-(1,4,5,6-tetrahydronicotinoyl)pyrazolo(1,5-a)pyridine	125.004	116.463	122.045	120.243	119.825	143.503	143.577	133.298	132.8	139.724
Libenzapril	18.0528	19.4952	24.0448	18.2146	16.1779	33.3099	32.0911	24.8589	25.6427	28.7412
2-Hydroxyadenine	43.4941	36.4028	41.8248	39.5712	39.8297	53.3728	48.5796	49.8965	44.32	49.6965
4-Hydroxyphenylglyoxylate	983.361	951.077	1003.94	974.356	944.739	1151.27	1124.19	1095	1046.33	1072.08
Methyl jasmonate	41.3307	31.7116	61.9744	43.4276	46.8776	149.325	142.941	130.265	96.5999	107.939
Succinyl-CoA	287.288	274.692	322.635	266.096	281.736	479.38	378.354	449.161	407.131	410.379
Austrobailignan 7	11737.6	11606.2	12168.2	11637.4	11615.1	13499.9	12869.2	12844.8	12687.8	12759.4
16-Oxopalmitate	1407.3	1357.81	1314.77	1380.14	1323.42	1464.86	1461.1	1468.8	1494.58	1485.51
PE(22:1(13Z)/PGE2)	10117.3	9557.75	9134.98	9553.06	9217.13	10945.9	10858	10809.6	11480.8	11283
(2R,5S,8R)-2,8-Dimethyl-5-propan-2-ylcyclodecan-1-one	787.056	764.59	738.536	729.249	731.424	819.24	825.069	809.052	826.596	830.386
Pyridoxamine phosphate	167.308	147.003	148.102	145.634	149.373	190.212	182.777	194.197	188.722	185.626
5-(10-Nonadecenyl)-1,3-benzenediol	2297.61	2080.62	2065.49	2107.19	2014.22	2420.99	2382.32	2403.32	2418.53	2331.21
Diosbulbin C	34.3457	34.8929	33.8155	35.7435	34.4853	52.821	48.5826	52.9182	53.5549	48.8214
PS(PGF2alpha/18:1(11Z))	154.214	177.124	166.573	190.355	166.556	265.947	268.414	271.769	278.264	260.65
Retinol / Retinol skeleton	125.541	123.453	120.239	117.073	118.433	162.093	175.166	174.319	182.935	168.187
PG(i-20:0/22:6(4Z,7Z,11E,13Z,15E,19Z)-2OH(10S,17))	216.736	227.216	206.734	172.83	154.241	319.374	317.159	350.779	348.174	317.587
Deoxycholylglutamine	3669.61	3532.79	3786.63	3052.81	2967.02	5013.64	4655.41	4434.68	4849.91	4571.14
Elatoside H	20.2801	22.864	30.3377	12.9964	15.1618	103.691	113.097	99.0629	99.1576	73.171
PI(PGF1alpha/18:1(11Z))	509.696	507.433	506.757	491.702	466.36	624.548	622.55	610.663	610.662	566.864
Ethylmethylmaleimide	28.2389	26.2362	30.2463	30.798	23.8075	47.214	49.131	47.3921	50.1678	41.5107
Mucronine D	76.3174	77.6784	76.3481	74.3264	59.7259	102.772	111.609	110.199	116.889	99.0972
Pedunculoside	1571.2	1593.31	1556.61	1558.78	1567.06	2021.16	2076.91	1950.55	1939.61	1925.71
4-Acetamido-4'-isothiocyanostilbene-2,2'-disulfonic acid	581.146	548.14	582.276	598.497	628.742	1236.99	1199.82	1141.21	1062.63	1116.97
Flavogallol	615.075	614.48	565.559	597.479	652.944	1109.58	1037.41	994.978	936.423	983.118
10-Oxo-11-octadecen-13-olide	17741.4	17707.3	17680.2	17303.8	17650.5	25081.4	24071.7	23435.7	22887.9	23087.2
M-Secociguatoxin 4A	3.40243	7.92325	8.79321	4.68595	4.59612	51.1378	40.9826	34.5315	29.9966	32.8045
DG(19:0/20:3(6,8,11)-OH(5)/0:0)	3242.56	3300.4	3447.89	3254.77	3165.32	4712.02	4567.07	4492.28	4263.54	4444.42
Nummularine A	246.376	246.39	258.04	230.333	243.806	381.322	382.341	348.345	337.41	360.009
2-Hepteneoylglycine	937.14	920.687	912.275	905.331	890.902	1019.98	1004.14	994.654	987.299	999.44
2-Hydroxyglutaric acid lactone	449.648	441.667	464.061	430.308	436.661	529.795	526.235	525.268	515.741	524.923
Urate	34729.1	34558.9	35450.7	34568.3	34444.3	41445	39472.1	39960.9	39710	39832.3
5-Hydroxyisourate	20459.9	20309.1	20518.2	20074.7	20124.6	24010.4	22994.3	23205.4	23233.9	23332
2-Carboxy-2,5-dihydro-5-oxofuran-2-acetate	42355.9	42447.3	42664.3	41771.1	41696.5	50184.5	48120.5	48584.7	48416.3	48614.4
6-Formylumbelliferone	48439.6	48591.9	48945.8	48223.4	47821.7	57693.3	55395	55699.3	55606.9	55793.2
Toluene-4-sulfonate	31067.2	30995.4	31112.7	30875.9	30765.6	36948.7	35406.1	35777.8	35464.3	35763.8
L-Xylulose 1-phosphate	24476.4	24278.6	24600.4	24234.3	24169	28891.2	27641.9	27860.1	27916.4	27855.4
3-Amino-5-(3-thiophenyl)-2-thiophenecarboxamide	16041.6	16174.3	16330	15894.6	15740.5	19262.2	18293.9	18316	18290.5	18342.8
S-Nitrosohomocysteine	20419.4	20318.6	20571.7	20252.3	19982.4	24259.1	23046.5	23230.8	23089	23479.9
TRIMELLITIC ANHYDRIDE	35937.9	35747.7	36063.7	35461.9	35009.4	42410.7	40379.1	40825.6	40777.1	40836.1
4,6-Dihydroxy-2-mercaptopyrimidine	1147.35	1122.09	1161.1	1110.48	1072.14	1367.76	1310.29	1312.56	1308.19	1320.82
Demethoxyrapamycin	104.801	87.1414	90.4183	62.0925	61.4769	248.281	214.487	218.425	218.508	242.983
Clinprost	142.973	141.775	129.683	121.906	128.809	198.067	173.423	187.505	180.829	169.501
Camelinin	6.40539	4.99466	5.90482	5.84727	2.67568	30.6765	23.4703	26.7406	23.2628	20.0877
Tetraethylene glycol	3495.06	3442.81	3579.65	3379.94	3351.47	4945.45	4617.46	4605.49	4411.39	4344.4
PS(22:5(4Z,7Z,10Z,13Z,16Z)/LTE4)	520.954	495.498	496.044	486.198	484.891	638.552	608.596	599.813	601.114	595.062
10-Deoxymethymycin	104.298	107.811	109.068	92.777	52.8371	336.598	288.082	322.815	287.531	274.162
(E)-2-Octen-1-ol	10.3445	17.5733	10.4338	13.4003	17.2463	78.7924	66.9909	62.1921	61.5692	45.4269
Velpatasvir	118.011	113.049	108.293	107.025	93.3528	186.462	176.396	169.135	179.979	144.74
Lactucin	163.07	178.216	149.847	151.686	157.709	224.761	222.55	211.241	211.593	212.713
Ecabet	19115.1	19950.8	18705.8	18797.6	18835.9	21865.4	21510.8	21158.2	20973.3	20917.3
5''-Phosphoribosylparomamine	434.129	494.235	519.203	402.851	406.828	801.07	885.784	822.461	852.538	816.493
Deforolimus	18.1053	22.2505	25.8739	12.0367	19.9151	60.459	67.127	62.6669	57.7703	57.5016
phosphinomethylisomalate	116.52	116.201	112.059	105.911	107.359	144.769	141.772	133.433	139.197	134.157
4,4-Dimethyl-14a-formyl-5a-cholesta-8,24-dien-3b-ol	1039.91	1010.66	1001.34	1003.5	999.111	1193.26	1201.31	1170.97	1192.18	1159.13
Fluoro 2,2-difluoroacetate	426.901	417.16	423.115	408.881	409.712	528.837	523.979	523.672	523.49	511.593
PA(PGF1alpha/12:0)	68.926	57.6719	65.0071	28.1252	51.5411	257.546	253.569	235.685	228.717	221.133
Tetranorbiotin	301.202	289.684	298.989	315.401	312.606	353.072	351.518	347.852	333.792	342.795
Herierin III	80.8731	81.298	88.1397	93.5295	89.0108	126.607	118.808	123.849	110.814	119.383
Gamithromycin	21890.9	20019	19844.6	22632.1	19917.7	24892.1	24777.5	25227.3	24503.6	24819.2
Sulfolithocholic acid	21898.2	19512.5	19942	22207.2	20071	27780.7	26655.5	25998.7	27846.6	26543.4
9-Hydroxydecanoic acid	105.877	102.705	95.2247	109.943	101.532	132.485	131.76	128.108	135.036	133.305
N-Docosahexaenoyl Lysine	4481.11	4341.66	4260.68	4655.71	4461.64	5450.25	5500.19	5359.68	5371.24	5349.52
CDP-DG(16:1(9Z)/6 keto-PGF1alpha)	36.4991	35.0278	43.8448	69.3067	13.4485	106.094	81.5718	90.4857	82.5077	77.7346
Desmosine	11454.1	11427.1	11506	11778.8	11309.3	12710.7	12188.4	12081.8	12400.9	12324.1
Zymonic acid	2608.87	2605.93	2580.96	2639.72	2579.07	3060.42	2913.3	2932.37	2924.88	2982.24
6'''-Deamino-6'''-oxoneomycin C	393.563	425.619	412.043	432.565	421.15	547.412	504.627	490.488	522.352	529.194
2-Thiouracil	616.543	607.959	639.695	646.15	599.758	726.319	703.575	679.313	699.291	705.22
(2S)-2-Phospholactate	1793.01	1821.1	1866.62	1863.19	1727.05	2156.09	2108.69	2095.18	2113.25	2143.64
TG(14:0/20:1(11Z)/22:4(7Z,10Z,13Z,16Z))	3084.93	3100.55	3127.88	3194.77	2925.05	3933.88	3836.75	3819.29	3773.82	3767.77
1-Benzazepine	25.5383	29.4411	24.2944	25.2837	26.2642	40.5352	36.0387	39.1838	36.2306	30.6339
Pentafluoroethane	115.584	126.901	120.087	127.721	123.788	163.732	144.414	151.415	150.304	145.542
2-Pyrone-4,6-dicarboxylate	284.028	299.142	282.263	281.396	307.134	383.248	330.918	366.345	346.248	366.91
Pentaethylene glycol	3678.66	3527.69	3482	3416.47	3355.37	4337.79	4155.23	4290.2	3917.76	3932.42
Hexaethylene glycol	1443.04	1337.31	1264.43	1319.89	1322.67	1601.08	1565.68	1676.44	1484.82	1528.47
Estrone glucuronide	267.118	230.409	229.967	246.37	241.414	358.232	333.951	421.274	319.016	367.405
PE(18:4(6Z,9Z,12Z,15Z)/P-18:0)	9025.95	8892.73	8718.49	8785.62	8882.24	9932.21	10217.5	10767.5	9888.64	10473.5
TRIETHYLENE GLYCOL	488.672	460.694	459.045	465.413	479.74	553.957	534.259	577.035	532.833	567.718
DG(14:0/20:4(6E,8Z,11Z,14Z)+=O(5)/0:0)	14988.6	14317.6	13566.3	13516.9	13766.2	16168.5	16063.1	16725.3	15668.5	16381.9
Heptaethylene glycol	275.597	265.337	251.374	259.642	255.868	311.97	311.005	325.552	299.736	327.803
D-Ribulose	254.864	226.892	213.712	246.817	231.335	299.762	307.899	323.647	310.05	301.488
PG(20:3(5Z,8Z,11Z)-O(14R,15S)/22:5(4Z,7Z,10Z,13Z,16Z))	549.14	532.278	528.081	544.811	526.813	643.749	639.683	659.258	624.275	626.326
Choline	133.311	127.293	121.992	130.347	125.772	156.281	154.342	162.185	152.232	157.729
Aspartylglycosamine	4174.33	4277.27	4176.62	4107.91	4262.87	4380.97	4564.29	4424.44	4396.57	4403.3
CMP-2-aminoethylphosphonate	215.313	205.378	212.871	212.038	241.092	270.054	328.052	292.932	272.925	272.881
Demethyldecarbamoylnovobiocin	457.905	467.848	457.225	446.746	478.942	502.853	560.594	539.245	543.943	519.422
4-Hydroxy-4-methylglutamate	1446.37	1431.57	1439.66	1373.88	1381.16	1497.72	1593.04	1516.04	1520.56	1510.9
4,4'-Dihydroxybiphenyl	67.6467	62.1067	59.5792	56.4605	61.9707	69.3869	81.7986	75.7079	79.8017	76.5989
1-Nitro-5,6-dihydroxy-dihydronaphthalene	118.72	116.351	101.509	115.869	103.199	124.938	145.372	141.492	145.2	141.567
Asparaginylcysteine	54.0629	53.8682	49.7424	52.792	49.4193	59.204	67.4046	61.3509	66.821	61.2474
PGP(22:4(7Z,10Z,13Z,16Z)/PGE1)	442.562	413.597	380.415	407.524	373.704	453.104	491.072	470.666	458.426	454.593
Myristoleic acid	609.395	578.54	544.171	569.767	544.74	630.273	679.925	623.091	625.791	640.763
1,2-Di-(9Z,12Z,15Z-octadecatrienoyl)-3-(Galactosyl-alpha-1-6-Galactosyl-beta-1)-glycerol	1641.63	1710.26	1508.36	1649.12	1548.54	2052.97	2220.7	2073.52	2099.97	2006.64
6-Epi-7-isocucurbic acid glucoside	690.198	698.624	669.898	712.247	699.005	855.303	899.268	860.794	867.922	835.656
4-Hydroxyquinoline	1224	1180.01	1168.44	1188.77	1174.51	1272.74	1301.64	1260.26	1291	1262.99
Biotin	598.823	593.35	557.876	581.351	567.862	664.185	657.092	652.421	683.693	651.595
Fenbufen	1108.97	1063.59	1048.44	1006.03	1030.17	1231.93	1249.04	1237.88	1236.66	1234.52
1-Octen-3-yl glucoside	1078.75	1050.17	1025.04	1011.64	1022.65	1171.04	1161.18	1188.94	1166.09	1157.4
Lacinilene C	913.527	858.711	851.474	849.994	827.467	1049.32	1050.77	1065.69	1053.51	1054.56
5'-S-Methyl-5'-thioinosine	2444	2372.68	2293.07	2348.92	2330.93	2755.03	2773.16	2773	2771.27	2675.98
Genistein 4'-rhamnoside	6287.59	6180.4	5621.15	6070.38	5989.98	7428.38	7421.69	7384.68	7416.77	7345.28
Glutathionylspermidine	1020.02	948.626	886.056	927.204	924.309	1436.09	1359.97	1293.91	1358.87	1335.71
17alpha,20alpha-Dihydroxypregn-4-en-3-one	140.057	107.915	101.483	99.0029	99.9303	400.633	369.456	349.251	369.607	342.292
Pyropheophorbide a	1837.86	1722.64	1721.54	1745.87	1740.53	2331.99	2264	2232.33	2241.24	2201.29
6-Hydroxypseudooxynicotine	111.487	85.4046	86.8093	93.1955	93.63	169.295	161.357	162.923	162.393	158.298
4-Methylaminobutyrate	807.934	751.077	735.25	756.888	764.518	983.156	984.857	944.318	973.891	966.933
2-Propyl-2,4-pentadienoic acid	44.3829	44.6756	39.6336	39.5655	42.6394	57.0723	63.553	63.7585	66.7788	59.3262
L-Serine	507.647	494.589	487.178	490.098	492.052	532.029	544.343	540.073	549.561	543.393
8-Oxo-2'-deoxyadenosine	1666.37	1623.55	1581.9	1598.35	1601.04	1916.15	1921.26	1908.79	1940.69	1898.33
Pravastatin lactone	808.548	754.76	765.607	754.991	764.787	983.681	1007.35	1002.4	1019.68	1018.16
1-(3-Carboxypropylcarbamoyl)-5-fluorouracil	354.411	344.335	332.473	329.191	327.642	463.58	469.337	463.448	484.071	470.756
1-(3-Methylbutanoyl)-6-apiosylglucose	1388.83	1341.3	1309.68	1283.92	1298.52	1703.72	1701.19	1736.98	1797.98	1755.5
13,14-Dihydro PGE1	1409.58	1323.45	1306.57	1366.7	1265.14	1562.24	1568.73	1601.25	1622.43	1576.57
Desglucocoroloside	675.404	644.337	628.901	641.518	611.736	716.712	746.08	752.543	750.563	725.855
N-Arachidonoyl Asparagine	2061.25	1910.59	1889.85	1897.39	1856.6	2232.63	2218.9	2221.06	2356.13	2208.41
Traumatic acid	566.314	540.437	518.625	538.438	513.593	610.645	617.193	610.24	625.207	617.803
Menthone 1,2-glyceryl ketal	4895.72	4676.99	4643.07	4646.26	4618.01	5115.68	5099.6	5155.5	5219.33	5156.03
Desoxoglabrolide	6427.61	6188.72	5493.79	5225.15	6038.4	6937.69	8102.33	8015.98	6635.48	7990.94
Trandolaprilat	314.419	302.083	303.652	296.03	315.849	357.949	362.778	364.058	330.628	379.985
9-octadecenal	19.3718	21.3753	13.9469	15.2701	20.6742	29.9133	28.2266	26.9934	24.9204	32.0465
N-Hydroxy-L-tyrosine	80.7845	73.2043	57.387	67.4815	68.8126	104.942	102.56	96.167	97.108	104.166
Boswellic acid	27442.4	26761.9	21267.4	22155.1	24729.2	32301.5	32915.9	32062.9	30868.2	32871.8
Osmundalactone	71.7776	72.9409	58.4037	64.4009	65.232	86.1028	86.2619	88.1073	84.7738	91.253
4-Oxo-1-(3-pyridyl)-1-butanone	178.982	163.683	152.196	162.703	172.112	186.633	189.868	188.622	199.566	201.341
20-Oxo-5-O-beta-mycaminosyltylactone	3448.95	3335.21	3057.81	3160.35	3429.69	3637.95	3736.48	3754.27	3695.72	3716
Jasmolone	54.7039	67.4744	55.2942	55.3025	54.0047	65.4449	75.5474	77.3608	74.6408	79.5672
Pristinamycin IA	31.481	21.1651	20.6228	7.06548	18.8671	71.444	94.2535	82.3965	59.5817	89.2727
Josamycin	44.5595	37.2506	53.7063	16.6127	16.7174	88.3887	106.162	92.615	91.4052	112.36
24,24-Difluoro-1alpha,25-dihydroxyvitamin D3	142.652	141.9	125.315	102.729	93.39	179.045	214.132	209.077	207.157	238.724
6-Deoxydihydrokalafungin	284.275	269.371	270.736	251.174	237.495	316.627	341.074	323.815	311.168	336.199
3-Ethyltoluene	265.894	258.512	256.931	251.3	253.11	274.652	283.455	278.584	272.816	286.342
PGP(20:3(5Z,8Z,11Z)/PGE1)	537.427	552.636	514.206	469.207	503.954	613.905	576.775	579.9	586.953	582.778
Neamine	2769.39	2757.52	2661.7	2641.32	2639.76	2831.2	2854.87	2864.16	2781.93	2851.29
2-Indolecarboxylic acid	82628.1	81146.8	80203	78820.9	78950.2	83618.6	85223	84269	84963.3	85991.5
11-Deoxycortisol-3-carboxymethyloxime	33.0421	26.8107	29.8266	16.4173	3.49824	56.5633	65.8565	62.9428	73.8508	60.1611
Polymyxin	38.708	33.487	38.0142	30.1917	19.1509	63.9539	81.7167	57.5779	75.6384	85.328
7-Sulfocholic acid	1175.81	1162.37	1201.5	1157.55	1147.85	1243.19	1273.47	1247.23	1294.18	1283.91
Pegdinetanib	1178.7	1211.7	1282.03	1159.5	1148.55	1323.62	1368.44	1365.66	1408.13	1406.1
diethyltoluamide	149.314	144.695	134.881	135.782	138.526	202.169	200.576	212.851	206.825	228.107
tetranor-12(S)-HETE	1844.44	1867.47	1853.67	1808.92	1836.25	2177.75	2133.28	2264.98	2210.91	2286.33
L-Pipecolate	125.812	124.545	119.076	118.328	120.3	185.523	188.15	203.95	181.218	210.266
12-hydroxy-3Z,6Z-dodecadienoic acid	2063.13	2080.26	2056.03	2027.07	2047.64	2279.52	2244.1	2341.72	2286.26	2335.85
13'-Carboxy-alpha-tocotrienol	535.079	538.279	526.69	527.979	515.62	616.917	631.657	633.16	670.463	656.714
(20S)-20-cyclopropyl-1α,25-dihydroxy-16,17-didehydro-21-norvitamin D3 / (20S)-20-cyclopropyl-1α,25-dihydroxy-16,17-didehydro-21-norcholecalciferol	7036.26	7036.53	7121.19	7045.57	7020.45	7770.83	7812.65	7990.29	8161.7	8192.76
11-((2-Dimethylaminoethyl)oxymethyl)erythromycin A 9-methoxime	51.7747	54.3865	48.778	49.4206	47.7241	102.556	102.651	102.417	112.15	113.273
Tetroxoprim	612.095	617.958	589.896	616.993	635.685	939.362	962.294	974.731	995.456	967.05
Methenamine	223.291	230.511	233.736	238.926	232.056	294.536	296.948	297.649	304.13	308.746
4,4'-Methylenebis(2,6-di-tert-butylphenol)	6082.46	6065.78	6116.71	6105.53	5968.72	7068.24	7147.26	7270.28	7506.93	7590.22
Icosatrienoic acid	85.5658	90.6489	93.4132	94.1919	80.8895	162.714	163.208	174.465	185.018	198.429
1,3,11(13)-Eudesmatrien-12-oic acid	62.2329	59.345	62.9148	66.254	61.9139	99.9673	99.3547	102.835	110.472	109.444
MG(0:0/18:1(11Z)/0:0)	745.24	741.046	780.527	780.333	768.002	1032.88	1017.93	1044.8	1095.85	1151.87
PG(20:3(8Z,11Z,14Z)-O(5,6)/a-15:0)	715.146	725.627	700.076	694.064	690.619	895.787	839.841	818.169	875.897	926.178
4,4-Dimethyl-5alpha-cholesta-8,14,24-trien-3beta-ol	217.151	205.669	222.157	210.818	221.61	473.508	444.047	428.388	493.494	521.617
PI(22:5(7Z,10Z,13Z,16Z,19Z)/TXB2)	664.112	652.176	666.202	646.216	655.92	1010.77	979.172	927.914	967.679	1009.14
PC(O-16:1(11Z)/2:0)	25650.6	25473.7	25606.5	25073.8	24428.8	33685.5	33285	32796.9	33305.6	34906.2
Crocin 3	4951.83	5383.61	5352.81	5029.31	4879.28	9324.45	9053.44	8920.97	9117.65	9675.75
5(S),12(S)-DiHETE	1005.35	967.01	1005.1	990.981	968.705	1176.37	1203.78	1170.2	1193.94	1225.58
1-Linoleoylglycerophosphocholine	11858.5	11626.9	11584.8	11640.8	11470	20270.6	19662	19758.1	19989	20676.1
RO 40-5966 (Methylmibefradil Metabolite)	9883.64	9743.6	9782.06	9506.48	9223.48	17200.5	16807.3	16876.9	17290.7	18133.4
Arg Phe Arg	8843.84	8615.55	8753.54	8672.89	8442.85	14191.1	13930	14079.5	14446	14840.4
Corchorifatty acid D	391.366	373.246	373.738	386.198	369.243	597.79	594.994	599.335	595.161	615.325
N(6)-(Octanoyl)lysine	618.913	598.745	588.797	595.892	585.284	1154.4	1199.28	1191.86	1199.03	1272.18
PS(15:0/0:0)	7767.62	7662.93	7738.39	7620.74	7585.17	10910.9	10735.3	10948.3	11026.7	11408
2-Hydroxymyristic acid	52.4952	53.5377	53.0656	56.4755	48.7915	156.908	151.057	157.596	172.568	174.358
DG(19:0/PGE1/0:0)	394.469	402.62	414.904	387.669	374.691	697.95	706.164	714.783	751.225	758.284
LysoPE(15:0/0:0)	110248	109934	111380	109046	108407	135675	134768	135702	138626	140926
beta-Hydroxy-2',6'-dimethoxy-3',4'-methylenedioxydihydrochalcone	24822.8	24107.6	24252.8	23978.6	23790.5	32288.6	32334.8	32119.4	33372.1	33913.2
Hydroxyprolyl-Histidine	2449.82	2346.21	2455.73	2338.75	2338.2	3281.14	3229.79	3291.74	3389.3	3382.87
9S,10R-Epoxy-6Z-octadecene	11456.4	11268.6	11771.5	11422	11407.7	14476.6	14392.3	14487.2	14804.6	15009.8
Lycopersiconolide	362.561	364.684	365.166	354.891	346.259	468.675	490.605	478.871	494.59	501.565
PE(22:0/20:3(8Z,11Z,14Z)-O(5,6))	220.135	250.914	252.629	232.297	208.249	570.354	597.043	617.032	618.813	657.013
9-Pentadecene-12,14-diyne-1,11-diol	22.1858	28.4176	26.2657	22.831	13.5568	225.218	211.34	222.436	235.325	282.172
Talatisamine	5306.49	5256.07	5257.62	5286.84	5324.19	6081.13	6099.18	6119.75	6176.88	6348.18
4-hydroxy-5-[4-hydroxy-3-(sulfooxy)phenyl]pentanoic acid	87.6454	85.4817	88.7534	83.3684	70.0668	139.02	133.009	147.097	151.655	154.332
(R)-1-O-[b-D-Apiofuranosyl-(1->2)-b-D-glucopyranoside]-1,3-octanediol	1176.63	1156.84	1146.24	1125.27	1074.77	1344.51	1326.76	1357.59	1354.96	1420.65
Tetracosahexaenoic acid	231719	226521	228537	217096	220832	262070	256109	259086	258728	264107
Oblongolide	2709.19	2666.76	2734.04	2578.3	2634.72	3232.34	3135.26	3236.73	3258.36	3348.26
12-[5]-ladderane-dodecanoic acid	58336.4	57800.1	58060.9	55815.8	56693.2	70624.8	68324.5	71105.7	71069.5	72670.1
PS(TXB2/20:1(11Z))	60.8751	63.5817	58.0206	47.6614	37.1691	138.555	128.398	129.144	139.801	144.957
PE(16:0/0:0)	175678	173199	176502	170797	169476	202617	200627	199681	203219	206844
PC(16:0/0:0)[U] / PC(16:0/0:0)[rac]	153712	151720	152404	148967	146852	179309	174910	173744	177714	180592
Glyceryl 5-hydroxydecanoate	1869.13	1815	1794.9	1747.16	1761.61	2124.18	2125.03	2144.12	2188.68	2211.19
Ricinoleic Acid methyl ester	11230.2	10968.7	11061.7	10791.1	10645.5	12695.8	12613.3	12641.3	12983.1	13093
Androstenediol	46.2805	38.6073	40.3279	43.0916	38.9738	72.1039	74.4642	73.2503	69.2979	84.768
3Z,6Z-Nonadien-1-ol	279.057	272.492	280.807	284.812	274.201	396.827	401.432	402.304	385.546	449.589
Lovastatin acid	32.4115	31.3442	32.7389	20.8616	29.5867	72.995	81.4988	80.7217	72.3936	103.412
Ampeloside Bs1	785.809	786.841	829.104	764.1	736.449	1173.5	1084.98	1094.81	1083.75	1275.8
1,4-Dihydroxynonane	1649.83	1651.09	1697.45	1596.94	1601.94	2755.58	2653.91	2676.7	2581.69	2918.26
DG(15:0/20:3(5Z,8Z,11Z)-O(14R,15S)/0:0)	2276.35	2273.5	2386.58	2158.78	2153.02	4150.37	3967.75	3945.12	3900.34	4403.76
8-Heptadecenal	2002.25	2048.45	2069.44	2000.33	1996	2958.9	2965.93	2996.87	2846.72	3321.73
10-keto stearic acid	16949.7	17256.7	17400.2	16629.3	16341.3	24489.8	24576.3	24443.4	22990.1	26377.9
Nicotinamide-beta-riboside	14.0134	12.0617	22.4361	7.20999	6.01574	62.2893	59.0828	66.7221	62.5026	63.3494
2-Ethyltoluene	248.844	239.975	244.038	240.033	242.577	276.546	280.482	288.856	278.094	288.836
L-Pipecolic acid	1438.8	1420.05	1447.61	1403.32	1405.81	1568.41	1617.39	1628.72	1596.57	1633.86
5-Aminopentanal	533.754	526.288	545.793	521.565	525.103	587.428	605.807	595.318	577.925	614.678
Cer(d16:1/LTE4)	11421.8	11952.1	11497.6	9335.9	10171.4	17191.6	18163.3	18494.7	16175.5	19048.6
(±)-3-Hydroxynonanoic acid	934.544	928.356	911.569	855.973	874.45	1065.26	1090.4	1108.3	1056.46	1106.83
6-O-Acetylaustroinulin	76.6008	111.095	87.1108	82.6243	88.8021	149.486	189.759	185.677	182.377	213.567
2,2,3,3-Tetramethylcyclopropanecarboxamide	137.758	141.646	138.461	134.137	134.309	188.012	198.189	197.428	194.089	214.909
Humulol	42.5106	47.6929	44.6203	47.2159	45.3256	58.9537	66.6468	63.661	60.673	69.4942
(1R,4E,5'R,6R,6'R,7S,8S,10S,11S,12R,14S,15R,16S,18E,20E,22S,25R,27S,29S)-22-Ethyl-7,11,14,15-tetrahydroxy-6'-(2-hydroxypropyl)-5',6,8,10,12,14,16,29-octamethylspiro[2,26-dioxabicyclo[23.3.1]nonacosa-4,18,20-triene-27,2'-oxane]-3,9,13-trione	108.062	123.814	110.461	128.183	106.73	167.552	190.838	182.149	199.013	210.095
geneticin	62.6628	64.9507	74.0024	43.1319	57.5214	186.12	187.376	165.986	156.314	179.279
Cyclosquamosin D	22.4308	41.251	36.5944	25.3166	18.8527	89.4386	88.4891	76.3216	71.684	83.2805
CPA(18:2(9Z,12Z)/0:0)	670.952	811.191	727.892	716.284	758.204	978.442	1013.76	942.539	938.742	989.854
Rosmaridiphenol	171.053	186.728	167.475	163.732	172.002	210.938	217.107	211.474	210.186	213.243
20-trifluoro-LTB4	64.6063	64.5847	69.4882	66.7633	64.4235	79.715	78.579	76.829	87.6647	75.1612
CDP-DG(PGF1alpha/16:0)	61.2342	53.1751	40.1926	43.1078	49.0861	186.725	143.639	122.582	299.66	240.927
N-Acetyl-b-glucosaminylamine	143.117	146.114	142.548	128.748	154.254	224.016	227.384	196.18	241.701	228.495
Esculentic acid (Phytolacca)	167750	163952	161177	167181	165170	172302	174747	177446	176854	178903
Prostaglandin E2 methyl ester	4577.25	4514.34	4312.57	4448.65	4288.69	4810.09	4916.57	5026.2	5032.06	5180.18
Phe-Pro-Ile	2527.33	2625.02	2196.98	2377.26	2381.7	3053.64	3372.15	3210.3	3406.27	3354.99
Alongside	130.805	133.139	123.719	127.987	123.816	142.63	157.153	155.136	161.337	153.602
Hydromorphone	473.207	469.139	459.405	455.214	460.182	508.919	542.865	529.905	544.463	529.732
Idebenone Metabolite (Benzenebutanoic acid, 2,5-dihydroxy-3,4-dimethoxy-6-methyl-)	1641.71	1602.22	1528.95	1554.64	1580.78	1885.63	1926.42	1933.45	1915.51	1963.53
Landiolol	3964.9	3854.82	3830.54	3842.39	3854.95	4077.34	4126.93	4107.39	4176.03	4144.42
2-Propenyl phenylacetate	23.08	18.443	30.9342	23.0444	24.6278	52.9716	64.5203	53.0735	66.5011	71.3824
PG(18:0/18:1(12Z)-2OH(9,10))	1921.84	1936.27	2051.13	1962	1948.95	2277.98	2358.88	2364.7	2506.79	2468.44
Filipin II	604.176	603.881	599.829	607.123	626.769	799.897	901.933	872.931	942.269	963.783
PGP(PGF2alpha/a-13:0)	79.5202	75.5153	79.7943	71.887	88.908	187.144	216.443	201.204	279.741	231.671
Nepetalactam	17.633	16.2027	16.5167	15.4239	17.6163	33.4593	36.5585	33.7383	40.9156	38.348
5-hydroxyoct-4-enoylglycine	536.782	532.054	526.522	540.117	541.573	642.746	680.23	667.75	709.989	682.138
L-Norleucine	86.7381	84.733	86.8203	88.634	93.1414	108.376	109.455	111.886	118.748	119.514
Capryloylglycine	85.4073	80.8529	85.689	85.4631	89.0331	103.675	113.06	111.04	112.187	113.9
[(1S,2R,3S,4S,6R,7R,14R)-4-Ethenyl-3-hydroxy-2,4,7,14-tetramethyl-9-oxo-6-tricyclo[5.4.3.01,8]tetradecanyl] 2-hydroxyacetate	1488.02	1288.13	785.817	730.644	674.496	3768.17	5825.13	6655.43	6880.83	7408.61
2,3-Dihydro-6-methyl-1H-pyrrolizine-5-carboxaldehyde	173.068	166.387	164.444	159.652	163.48	200.051	211.947	212.463	220.472	223.546
3-Methoxy-4-hydroxyphenylethylene glycol	309.771	321.705	281.588	326.69	319.974	376.359	394.598	394.615	433.422	448.196
2,3-Dinor-8-iso prostaglandin F2alpha	133.109	138.573	128.897	133.047	137.97	153.828	153.691	157.668	174.685	168.473
Desglucocheirotoxin	1622.79	1667	1673.4	1648.09	1602.32	1800.16	1904.22	1891.87	2087.84	2016.72
4-Hydroxy-4-methyl-5-hexenoic acid gamma lactone	100.074	104.33	110.132	108.62	103.963	129.847	127.848	142.68	153.563	158.546
3-(2,4-Cyclopentadien-1-ylidene)pregn-4-en-20-one	1069.78	1077.95	1103.29	1076.1	1075.83	1200.76	1204.29	1277.54	1288.57	1294.49
7,8-Dihydropteroic acid	273.127	312.351	309.474	278.196	265.523	434.362	412.33	461.301	489.123	473.323
3-Dodecyloxypropane-1,2-diol	71.6976	76.3021	75.4305	75.1264	74.1825	94.3772	93.2285	105.176	114.139	104.52
(9S,10S)-10-hydroxy-9-(phosphonooxy)octadecanoate	1156.62	1105.89	1111.88	1145.45	1148.75	1344.11	1382.68	1411.19	1421.71	1407.13
PC(20:5(5Z,8Z,11Z,14Z,16E)-OH(18R)/18:0)	593.652	570.912	548.1	587.806	582.973	743.117	773.071	774.349	766.925	787.319
Carboxyethyl-hydroxychroman	289.613	279.401	276.878	278.242	290.635	333.568	337.575	342.706	341.087	337.784
(1beta,2beta,5beta)-p-Menth-3-ene-1,2,5-triol	511.911	483.979	479.682	512.081	507.058	612.252	618.576	627.519	638.086	625.994
Putaminoxin	251.47	239.245	235.544	246.538	256.541	298.635	308.456	303.212	312.379	304.821
Semagacestat	1042.29	1069.51	1060.76	1076.05	1054.6	1422.71	1497.68	1557.31	1503.74	1579.83
SM(d18:0/PGJ2)	11603.8	11802.6	12740.3	12836.7	12799.7	17347.6	17845.3	18901.9	17897.2	19234.6
1,8-Dihydroxy-3-methylnaphthalene	100.104	94.1522	97.3516	105.084	108.821	132.937	132.308	138.196	138.008	143.257
(R)-4-Phosphopantoate	15.4743	3.21354	11.0683	17.1646	26.914	83.0715	93.6495	102.854	104.845	118.791
Pimecrolimus	5410.17	5382.47	5241.64	5747.09	5715.56	6920.83	6740.59	7225.34	7276.46	7500.34
AUDA	1975.2	1897.34	1874.02	1971.37	1901.3	2402.53	2368.13	2434.85	2443.89	2529.87
DG(15:0/20:5(5Z,8Z,11Z,14Z,16E)-OH(18R)/0:0)	48903	47144.5	47238.2	47989.7	49485	57920.8	56911.1	57923.2	59391.8	61142.7
Ala Arg Arg His	389.126	382.033	388.895	412.8	396.22	463.708	477.932	454.22	465.779	469.664
2-Hydroxyundecanoate	69.6339	69.7778	68.6626	71.0541	69.4421	85.2021	86.512	82.5477	87.7674	91.2889
3'-Hydroxy-T2-triol	3987.36	4052.18	4093.09	4053.99	4152.98	4461.37	4469.47	4436.28	4580.79	4600.19
6-(Pyridin-3-YL)hexanoic acid	70.5952	75.8036	87.3517	85.3102	101.248	176.894	201.292	170.374	203.103	203.089
Deoxycytidine	76.3008	87.9673	87.031	89.3089	90.9846	148.717	160.176	146.451	167.385	163.627
alpha-Micropteroxanthin B	1409.56	1462.26	1465.13	1487.22	1499.44	2161.98	2241.86	2200.12	2320.76	2327.23
PG(20:4(8Z,11Z,14Z,17Z)-2OH(5S,6R)/18:0)	3293.36	3537.7	3803.18	4293.66	4289.85	6537.39	6169.59	6075.81	6947.75	6942.54
(10S)-Juvenile hormone III diol phosphate	69.4877	71.7228	76.7351	85.8029	91.4734	144.408	135.081	131.859	160.576	165.626
Caspofungin	1351.94	1176.47	1328.57	1375.33	1415.87	2252.16	2217.94	2107.5	2502.56	2357.35
(R)-8-Acetoxycarvotanacetone	71.5897	63.0702	68.415	80.3807	84.1277	134.551	135.037	131.205	140.058	135
Doxylamine	556.092	553.505	564.239	592.2	569.156	683.317	682.733	677.325	702.657	691.861
4h-Benzoxazine	466.923	456.86	454.549	475.886	473.471	493.964	500.058	489.025	505.205	504.403
3',5'-Dideoxythymidine	283.009	281.915	259.846	299.281	293.531	322.742	350.177	325.268	348.917	353.444
Corchorifatty acid A	9013.84	8858.18	8088.25	8768.69	9329.63	11481.9	10806.9	11059.7	11839.8	11267.5
Ponasteroside A	1690.7	1709.57	1543.18	1630.95	1685.21	2077.64	2081.32	2085.32	2173.28	2073.7
Muscomin	67.3738	75.6919	57.6432	53.8013	82.3161	142.337	142.58	156.084	174.609	177.637
DG(15:0/PGJ2/0:0)	14502.6	14405.2	13798.1	14267.1	14430.3	15925.1	15694.2	15791	16475.5	16691
3alpha-Hydroxyoreadone	3129.87	3058.1	3077.74	3153.42	3100.79	3216.97	3187.52	3203.47	3310.66	3233.36
CRUSTECDYSONE	14438.9	14110.2	14257.3	14595	14443.6	14895.8	14828.5	14746.7	15290.7	15012.9
Adamantylamide-alanyl-isoglutamine	463.957	435.15	450.002	457.048	449.987	485.258	494.786	494.321	517.466	496.741
Corchorifatty acid F	33617.8	32980.6	32966.7	33816.5	33074	34421.5	34359.2	34519.1	34927.8	34703.9
Momoridcin	8572.29	8208.26	8150.71	8533.05	8350.85	9151.14	8928.33	8902.82	9386.23	9239.44
PC(20:1(11Z)/PGF1alpha)	764.225	813.142	723.753	821.944	768.004	886.226	928.539	945.869	1045.57	979.553
Dextrorphan	7594.32	7718.57	7204.98	8042.66	7744.3	8173.69	8954.26	8792.76	9491.48	8812.89
N-Docosahexaenoyl Glutamic acid	4779.82	4906.89	4819.15	5258.79	5004.71	5448.23	5874.59	5665.37	6204.58	5798.74
Tetracosahexaenic acid	415.8	428.652	399.234	428.293	458.767	512.813	560.059	566.53	594.137	547.223
Ricinoleic acid	72504.1	73011.5	72106.3	73873.1	74050.7	79020.9	78860.5	79526.9	80849.3	79819.9
PGB2	1139.5	1160.91	1100.8	1247.17	1271.43	1516.48	1562.88	1504.27	1602.47	1549.71
7,8-Dehydro-beta-micropteroxanthin	326.902	318.118	294.129	350.59	359.38	427.001	448.11	451.44	467.968	474.539
PG(i-22:0/18:1(12Z)-2OH(9,10))	14769.1	14828.5	15152	15333.8	15006.1	16377.4	17041.3	16908.7	17950.3	17405.8
LysoPG(18:1(9Z)/0:0)	430.431	431.755	442.705	489.106	420.488	577.963	602.718	614.323	670.455	629.68
linoleyl-l-carnitine	1109.5	1101.17	1112.26	1161.65	1118.43	1363.53	1403.7	1450.76	1520.43	1465.78
Lyciumoside IV	3815.94	3830.67	3848.93	3912.46	3860.82	4147.34	4244.27	4213.23	4434.31	4383.79
Methyl 16-hydroxyhexadecanoate	1357.23	1370.72	1374.37	1412.78	1409.99	1494.72	1506.9	1520.45	1593.23	1548.98
1-Deoxy-D-xylulose	6338.11	6186.38	6209.92	6577.36	6654.5	7509.21	7851.44	7948.57	8478.21	8162.84
2,2-dichloro-1,1-ethanediol	3066.21	3068.95	3156.67	3048.52	2895.61	3564.14	3339.68	3430.5	3599.2	3589.42
merbarone	186.156	188.732	194.696	176.866	149.985	235.539	215.605	227.839	240.521	232.245
Emindole SB	3214.27	3149.42	3185.01	3135.73	3100.57	3434.35	3343.07	3344.22	3411.85	3348.73
5-[(2R)-2-Aminopropyl]cyclohexa-1,5-diene-1-carboxylic acid	12914.3	12857.9	12707.8	12650.7	12604	13267.3	13082.3	13156.9	13255.4	13255.9
(+)-Abscisic acid	23916.1	23522.2	23341.3	23372.8	23122.4	24462.1	24024.6	24275.6	24709.2	24558.9
Stearidonic acid	7536.59	7377.17	7412.64	7439.07	7045.02	7739.07	7783.96	7712.75	7774.91	7722.98
2-Methylbutyrate	220.291	209.983	207.95	215.839	202.059	230.172	226.783	222.429	232.724	228.778
2-Ethylidene-1,5-dimethyl-3,3-diphenylpyrrolidine	5195.16	5027.23	5121.98	5158.65	4915.68	5375.23	5464.54	5363.94	5546.58	5497.37
5,7-Dihydroxy-4'-methoxy-8-methylflavanone	741.273	712.17	715.084	715.511	677.701	847.422	801.317	850.644	862.362	826.13
Phenmetrazine	146.215	88.6449	115.146	109.251	92.8105	196.974	168.866	194.177	230.806	188.471
Glutaryl-CoA	3298.11	3101.83	3056.12	3197.98	3076.29	3627.62	3339.09	3447.26	3535.27	3537.16
N-lactoyl-Tryptophan	2927.11	2814.45	2834.52	2866.15	2855.14	3090.19	2951.45	3058.95	3082.01	2998.99
Parthenolide	95.7591	87.0357	73.4932	95.3547	85.1547	110.897	103.09	118.186	124.966	114.031
(9S,10S)-9,10-dihydroxyoctadecanoate	16483.4	16223.9	15825.4	16436	16190.9	16758	16689.9	16897	17075.9	16964.9
Lificiguat	642.894	623.108	617.535	639.417	641.316	741.274	705.321	704.621	723.939	708.609
2-Picolinic acid	187.121	165.587	167.29	177.764	186.306	233.299	216.768	213.478	237.187	223.523
cis-2,3-Dihydro-2,3-dihydroxybiphenyl	268.32	247.512	233.031	263.167	254.21	320.467	307.187	311.558	320.97	307.889
(R)-Butaprost	63800.5	63271.9	62884.9	64240.6	63885	65796.9	65558.3	65491.7	65957.4	65309.9
Eupaserrin	1385.17	1281.7	1303.98	1300.68	1331.66	1422.07	1413.5	1444.68	1470.91	1425.64
Cyclohexa-2,4-dienylmethanol	81.5432	76.1397	79.9395	75.4389	80.4487	95.0721	93.4491	96.1021	101.36	94.6016
1-Methylpyrrolinium	209.491	194.573	198.126	193.131	197.632	227.74	230.352	241.319	254.375	232.213
Gibberellin A28	192.501	176.994	177.4	167.873	175.236	229.813	240.659	241.546	247.456	221.137
6-n-Propyluracil	33.4077	35.0374	37.2764	48.7688	48.116	67.0776	69.4169	72.5459	73.6825	71.3612
4,4-Dimethyl-2-[3-carboxylatopropyl]-2-tridecyloxazolidine 3-oxide	7676.04	7563.87	7821.05	8192.32	8090.17	10172.2	10003.7	10046.4	10617.7	9890.13
Rasagiline	95.1372	94.5983	95.6473	103.561	105.559	129.665	131.511	133.725	129.516	119.37
Medina	141.227	149.064	148.668	162.214	155.513	190.032	202.779	196.842	194.318	181.775
N-(3-Aminopropyl)-N-methylcarbamic acid tert-butyl ester	489.67	493.328	512.724	516.865	514.525	582.755	599.952	606.703	586.49	565.989
Rhapontigenin	418.776	425.089	425.607	420.797	447.24	488.684	475.709	495.676	485.509	469.478
PA(P-16:0/20:4(6Z,8E,10E,14Z)-2OH(5S,12R))	1858.73	1910.11	1943.99	1989.46	1940.09	2282.92	2264.85	2389.34	2304.85	2229.43
6-O-Methylguanine	98.1563	99.4452	97.6039	96.8921	102.717	131.128	122.477	141.053	137.519	127.129
Arecaidine propargyl ester	184.719	188.317	179.724	192.19	187.689	300.699	314.593	313.103	350.881	286.185
3-O-alpha-Mycarosylerythronolide B	767.83	759.203	767.095	781.595	754.644	1037.36	1086.88	1104.1	1152.92	1002.37
2-Acetyl-1,5,6,7-tetrahydro-6-hydroxy-7-(hydroxymethyl)-4H-azepine-4-one	150.554	172.43	167.67	175.205	179.668	299.358	303.34	311.835	318.06	289.151
Gly Ala Ala Thr	339.392	336.388	327.465	356.15	352.939	552.848	563.912	563.15	577.709	529.196
24-Norursa-3,12-dien-11-one	4800.66	4677.6	4753.52	4930.1	4940.51	6230.59	6369	6336.85	7182.44	6274.83
Flurithromycin	390.744	387.317	379.31	405.673	412.732	529.746	534.678	551.158	573.707	519.746
Glutaminyl-Gamma-glutamate	744.474	723.382	711.94	768.19	765.953	888.329	889.126	880.472	932.024	850.351
Gabapentin	64.4786	58.0065	55.248	76.99	71.1807	113.005	110.945	115.514	131.745	110.598
Echinopsine	61.742	63.6661	64.5757	66.8634	69.492	85.3206	89.0282	99.3497	102.825	87.2944
PI(PGE2/20:1(11Z))	1479.64	1544.85	1517.13	1552.79	1497.24	1775.94	1727.77	1792.05	1821.18	1721.7
(S)-9,10-Cyclo-p-menth-1-en-4-ol	70.4341	69.2837	76.0882	77.7575	76.7679	106.198	98.0532	111.79	107.028	100.36
4-Coumaroylshikimate	15.9101	25.8435	23.6864	20.7074	24.7448	33.1326	36.8242	36.4624	45.8236	34.6816
Dendrodoine	296.424	316.039	302.674	323.982	319.967	349.786	338.176	343.445	362.685	342.365
PS(18:1(12Z)-2OH(9,10)/20:0)	335.261	353.503	340.224	378.455	361.879	411.395	414.519	417.354	432.752	393.113
8-Deoxy-11,13-dihydroxygrosheimin	189.395	176.516	193.104	197.691	200.736	226.514	217.24	249.033	239.348	222.457
all-trans-13,14-Dihydroretinol	143.433	130.754	131.739	147.57	140.784	161.076	168.927	206.282	188.942	177.996
Styrene	72.5833	69.0477	69.9577	73.8558	76.1065	83.2553	80.8531	97.3734	86.183	89.0724
Armillarin	54622.1	50537.4	53093	51829	53658.2	61624	57932.3	70403.2	64174.9	65015.9
Methyl (Z)-5-(1-propynyl)-2-thienylacrylate	463.134	438.034	463.724	478.609	463.667	584.578	548.219	565.602	557.008	555.633
9-Acetoxyfukinanolide	2476.87	2362.87	2407.94	2533.74	2516.58	2940.88	2817.23	2901.61	2810.14	2801.9
Tryptophyl-Glycine	760.296	704.519	726.763	765.191	713.863	1024.34	934.858	983.084	962.419	956.982
(2xi,3xi,6E)-3,7-Dimethyl-6-octene-1,2,3,8-tetrol	112.492	88.8107	91.4841	108.905	100.75	199.318	183.073	202.992	197.355	193.302
(9R,10S,12Z)-9,10-Dihydroxy-8-oxo-12-octadecenoic acid	614.956	583.812	576.545	610.491	603.536	772.67	755.353	775.594	765.604	746.841
alpha-Hydroxy-NDMA	1980.04	1885.05	1965.26	2021.33	1974.45	2223.15	2093.41	2180.5	2189.95	2190.16
Clarycet	654.204	642.609	595.571	654.852	623.15	772.877	728.73	772.066	774.566	763.213
Asymmetric dimethylarginine	469.446	457.393	434.748	456.849	447.14	600.072	542.502	594.093	588.451	586.451
3,6-Dimethyl-2(3H)-benzofuranone	87.1939	85.6144	86.7716	90.7811	84.9618	105.521	99.3845	111.501	105.138	103.045
Cucurbitacin A	526.92	519.5	537.731	554.556	510.531	727.697	652.868	703.546	715.542	666.701
PE(22:1(13Z)/20:3(8Z,11Z,14Z)-2OH(5,6))	3253.82	3233.03	3275.22	3377.66	3269.83	3886.84	3658.44	3874.56	3925.8	3829.5
DG(10:0/20:3(5Z,11Z,14Z)-O(8,9)/0:0)	44.0734	112.168	106.642	182.748	121.199	261.032	222.813	322.433	252.482	273.44
meso-Tartaric acid	422.254	445.22	417.351	453.582	431.082	506.504	477.376	509.004	492.083	481.374
1-docosanoyl-glycero-3-phosphate	9176.58	9917.05	10391.5	12330.1	9323.31	16044.7	15198	16890.9	14742.1	14689.8
Carindone	4233	4270.08	4292.87	4201.68	4038.79	4679.5	4512.63	4807.81	4693.94	4735.3
Prostaglandin E2 isopropyl ester	3442.8	3482.15	3487.83	3270.42	3317.67	3812.61	3767.21	4003.3	3834.86	3882.01
Quillaic acid 3-[galactosyl-(1->2)-glucuronide]	32.8965	27.8401	20.3948	9.75506	10.7901	66.3142	62.6204	80.8214	65.4737	53.6528
Hexadecasphingosine	92.9199	98.9059	93.2728	81.6053	86.3822	126.816	117.352	128.774	130.893	115.057
4,4-Bis(p-fluorophenyl)butyric acid	304.72	300.932	300.495	288.672	290.929	366.366	354.509	370.782	383.132	361.486
3-{[(2E)-4-Amino-4-oxobut-2-enoyl]amino}-L-alanine	84.2527	90.7146	89.6313	77.3412	84.9354	106.102	94.9171	109.448	100.459	101.291
PA(20:0/22:2(13Z,16Z))	25966.2	25392.5	28268.3	26527.2	25784	35010.9	31559.6	33349.6	33418.2	32098.3
(S)-2-Propylpiperidine	132.664	126.392	136.478	125.241	131.048	172.096	157.589	172.138	159.97	159.253
Lyciumin B	151.062	148.519	164.575	153.161	158.701	184.447	201.297	202.656	175.937	174.457
T2 Triol	366.801	405.237	444.265	398.702	440.804	505.386	542.765	538.56	506.238	572.291
Sophoracarpan A	349.313	326.743	333.343	331.809	334.85	405.36	412.405	418.041	391.924	415.688
1,3-Octadiene	38.3764	39.3485	37.4045	39.6586	42.4496	60.7959	61.8848	62.9152	54.0746	65.5625
1-Methylcyclohexanol	40.3932	37.2844	38.9675	40.2611	43.0195	59.9051	64.8352	65.0092	55.5825	64.6635
Trigofoenoside E1	1480.21	1527.42	1702.26	1581.76	1635.21	1791.57	1825.14	1811.12	1821.72	1831.64
Polypodine B	230.912	250.921	308.481	226.13	246.77	314.815	336.391	335.914	323.402	333.183
12-KETE	406.17	412.113	545.113	477.594	339.659	667.469	828.938	747.772	584.942	683.711
N-Docosahexaenoyl Methionine	936.605	933.845	1003.45	955.019	945.677	1015.63	1169.77	1130.68	1081.25	1162.75
3alpha,7alpha,12beta-Trihydroxy-5beta-cholanoic acid	218114	217682	232699	224821	214768	234004	245392	249124	237753	255694
PG(16:0/0:0)[U]	208557	201675	235292	215578	198646	248322	266255	278900	244906	279106
DG(17:0/20:4(6E,8Z,11Z,14Z)+=O(5)/0:0)	7296.7	7615.33	9085.79	8198.23	7289.48	9630.08	11081.8	11048.7	9413.78	11146.2
Imidazole acetol-phosphate	702.539	678.462	748.637	696.434	713.141	810.732	800.199	772.083	801.301	814.825
(13R,14R)-7-Labdene-13,14,15-triol	258.937	250.698	264.845	249.99	261.85	310.138	318.362	296.138	296.665	316.335
Zerumbone	3035.18	3009.04	3234.92	2875.07	3223.6	3847.21	3900.79	3652.85	3649.25	3870.77
Val-Gly-Val-Ala-Pro-Gly	3377.23	3468.13	3507.91	3427.75	3493.94	3902.54	3752.43	3786.33	3790.49	3901.62
PA(22:4(7Z,10Z,13Z,16Z)/TXB2)	3369.31	3567.81	3919.54	3519.83	3603.78	4833.34	4636.63	4692.15	4523.41	4836.45
PC(DiMe(11,5)/LTE4)	4879.25	5081.77	5518.75	5035.66	5200.37	6885	6461.16	6467.4	6558.64	6709.92
Coniine	412.884	422.634	452.489	394.62	410.776	623.615	567.392	586.698	574.793	609.104
Uridine 5'-diphosphate	5394.87	5646.84	5743.68	5657.16	5667.48	6877.41	6672.22	6592.01	6610.31	6740.32
Peroxynitrite	1380.18	1418.89	1449.75	1394.08	1410.66	1688.68	1639.09	1657.03	1613.76	1645.29
Cholyl-L-dopa	5804.02	5762.38	6054.03	5968.92	5783.95	7376.5	7083.45	7079.26	7115.37	7328.74
Icosenoic acid	328.106	342.295	360.252	352.845	329.986	475.021	462.233	463.257	445.491	492.934
5-(3'-Carboxy-3'-oxopropenyl)-4,6-dihydroxypicolinate	82.7035	85.7305	90.5914	84.3766	84.0833	147.665	156.307	139.358	135.949	153.149
Hoduloside III	35.928	42.1465	39.5328	13.3363	23.7807	210.568	188.513	174.809	155.757	226.923
3b,17b-Dihydroxyetiocholane	81.8109	82.9528	84.5934	78.9501	86.4491	96.6185	92.053	92.3298	94.745	99.2103
Mannopine	1052.73	1053.42	1057.51	1019.55	1045.85	1126.32	1119.52	1113.62	1160.53	1151.31
geldanamycin	11.0134	16.1955	18.961	5.89052	20.1072	42.214	39.336	38.5787	52.3926	49.5796
Dalfopristin	75.3244	91.1734	87.1822	75.1938	63.1122	156.867	170.142	167.197	160.115	175.457
1-Naphthylmethanol	14.9961	13.94	16.1562	13.7209	14.3541	25.3463	26.869	27.8898	24.148	28.3514
Genipic acid	138.324	153.281	146.632	133.504	142.514	182.49	170.247	185.401	180.978	185.059
Quercetin 3-O-sophoroside	448.039	465.039	467.7	448.916	451.707	609.727	568.842	606.691	601.055	622.686
10-Hydroxygeraniol	114.064	114.254	115.712	114.03	115.431	142.603	138.814	144.984	136.248	145.83
PI(18:1(11Z)/PGE2)	1358.54	1390.09	1427.37	1373.59	1385.53	1696.83	1640.94	1693.34	1671.12	1710.03
10-propyl-5,9-tridecadien-1-ol	4.03e-07	3.93512	5.29311	1.88686	4.03e-07	79.5475	69.3639	80.9617	74.9028	79.3951
2-Fluoro-1-nitroimidazole	1899.93	1989.87	2083.61	2061.29	1996.82	2328.07	2221.41	2257.9	2370.41	2452.1
2-(Methylenebutyl)-cyclopropane	37.5207	38.6586	41.2353	38.2237	38.0023	47.8522	44.3915	44.8284	47.9577	49.327
PS(20:0/18:0)	897.656	1366.04	2301.86	718.157	705.895	2412.73	2408.86	2406.55	2837.94	2851.47
PA(P-16:0/PGF1alpha)	9525.78	10284.1	12540.1	11881.9	10039.3	13455.1	14043.5	13634.8	13789.2	14415.9
17,23-Epoxy-29-hydroxy-27-norlanost-8-ene-3,15,24-trione	2571.2	2593.02	3212.13	3096.38	2453.04	4320.12	4036.3	4041.42	4387.92	4026.57
PI(18:0/TXB2)	8610.37	8970.62	9602.9	9312.99	8872.54	10611.3	10110.7	10501.8	10899.9	10656
2',4'-Dimethylacetophenone	100.756	98.6419	98.3314	96.0709	103.54	87.1423	84.114	84.8726	88.5954	84.1795
Vinaginsenoside R14	72.3503	66.5857	64.7302	59.1441	73.8496	52.3475	35.2646	38.5534	36.4861	26.9539
CDP-DG(20:3(5Z,8Z,11Z)/PGF1alpha)	486.733	424.137	433.231	431.227	493.486	371.055	338.641	335.086	341.772	320.249
2-Tetradecylglycidate	1697.84	1611	1585.85	1565.88	1673.27	1335.03	1291.59	1281.26	1325.81	1286.76
Bax inhibitor peptide V5	77.6899	97.5118	102.691	88.491	104.528	25.2161	79.3204	49.8842	40.376	25.5471
l-Felinine	344.864	347.467	347.802	351.967	356.258	315.596	336.902	335.394	328.798	316.996
Serylhistidine	44.4935	44.6346	52.0462	43.2998	44.6778	22.5893	30.1428	29.4001	29.5274	19.1343
SECNIDAZOLE	136.466	138.097	138.464	139.816	138.159	91.137	100.91	97.8553	88.6315	86.7404
Topaquinone	191.936	198.773	210.238	201.645	210.623	125.62	134.501	138.947	128.57	120.439
(S)-2-Hydrazinopropionic acid	685.341	689.992	691.858	675.149	689.682	532.396	570.216	562.693	557.294	533.6
Chembl4159192	249.793	282.665	286.415	298.704	267.105	99.6365	116.951	114.184	86.3003	74.9306
Hordatine A	152.108	192.716	198.196	191.033	177.714	57.8142	59.3208	72.3213	66.7203	43.2525
Eremopetasin sulfoxide	4341.2	5575.39	5894.72	4912.28	6007.95	2672.8	3258.51	2702.55	2885.16	2946.54
Galabiosylceramide (d18:1/22:0)	569.705	628.058	711.163	644.153	761.765	302.853	345.818	266.439	305.71	350.574
1-(5'-Phosphoribosyl)-5-amino-4-imidazolecarboxamide	36.6554	52.034	67.1085	56.4279	69.9269	17.0832	22.8338	18.3993	11.4504	10.2634
1-(2-Methoxyethoxy)hexadecane	244.469	257.625	280.111	267.902	270.481	211.001	222.737	204.613	207.449	217.839
5-Hydroxy-2-imino-1-methylimidazolidin-4-one	960.956	1083.73	1094.69	883.991	1035.62	730.944	853.565	765.637	781.641	786.285
Pentadecenoic acid	229.396	257.504	257.347	224.309	244.052	186.381	208.527	207.383	204.244	203.366
(R)-Marmin	634.371	682.503	682.085	620.939	654.417	549.753	596.463	533.114	550.457	588.331
Methylene dithiocyanate	76.9887	93.4113	95.4369	74.5112	89.3674	55.7761	59.7326	46.4324	45.3983	50.3322
PE(22:0/LTE4)	6329.13	6800.43	6944.74	6595.84	6626.31	5756.78	5874.53	5666.47	5680.02	5761.77
Tyr-ile-gly-ser-arg	296.204	274.921	283.282	280.125	278.386	244.835	243.781	241.646	239.972	243.581
Pesticide4_Ivermectin_C48H74O14_22,23-dihydroavermectin B1	342.326	355.291	357.693	346.945	319.68	219.141	222.342	241.828	225.873	193.819
PA(22:4(7Z,10Z,13Z,16Z)/PGD2)	152.174	140.436	136.189	146.222	108.142	72.5789	75.6656	65.6365	67.5546	56.6187
exo-2-Methyl-3-methylenebicyclo[2.2.1]heptan-2-ol	99.6916	95.5478	93.748	98.2642	88.3313	74.8822	73.6053	74.6863	73.0941	72.7981
alpha-D-Glucosamine 1-phosphate	301.455	300.999	289.069	285.592	295.032	262.716	255.84	262.374	257.592	247.884
14alpha-Hydroxy-4beta-deoxypaxilline	1129.92	1099.24	1081.23	1087.79	1105.93	926.927	936.414	965.593	965.065	901.805
Serylserine	366.807	362.283	365.114	351.422	355.696	293.432	315.243	303.699	307.141	299.733
Posatirelin	489.589	508.394	497.432	473.375	477.954	387.752	405.806	408.326	386.929	398.713
Milbemycin beta1	1720.38	1706.7	1674.38	1632.25	1664.34	1334.94	1395.5	1412.25	1359.29	1363.51
3beta-Hydroxy-5-cholestenal	2541.42	2518.76	2430.68	2277.36	2371.76	1567.8	1745.64	1772.37	1497.89	1675.83
LysoPE(20_3(8Z,11Z,14Z)_0_0)	5463.98	5373.31	5421.97	5354.42	5250.85	4444.72	4679.09	4654.22	4521.87	4484.34
Isokobusone	622.776	621.974	611.184	605.935	608.089	444.107	475.838	472.771	438.643	446.894
1-Methyl-2-propylbenzene	283.67	278.631	277.295	268.139	265.36	173.101	178.465	183.35	168.863	168.895
alpha-Irone	1593.36	1585.75	1593.59	1542.43	1543.07	1100.91	1107.46	1155.98	1041.83	1070.24
Panaxytriol	247.204	250.405	244.241	247.817	243.78	188.546	200.532	200.298	193.863	187.948
16alpha-Hydroxyestrone	814.309	816.796	781.855	795.332	795.012	636.69	664.584	667.249	630.426	614.522
Cyclosquamosin F	186.531	185.796	178.001	178.076	194.39	93.0355	103.603	90.7549	82.6295	75.1339
5-(2'-Formylethyl)-4,6-dihydroxypicolinate	402.555	424.758	412.292	402.38	403.282	351.406	364.187	358.894	373.968	375.239
Capsianoside III	947.641	987.848	940.263	948.647	928.16	788.624	821.345	811.086	840.18	811.398
Lyciumoside VIII	554.783	592.043	546.954	536.603	550.351	376.572	396.424	354.224	438.427	394.425
gamma-L-Glutamyl-butirosin B	2298.07	2449.01	2523.11	2325.98	2453.91	1729.46	1880.27	1771.5	1780.8	1809.99
Devd-cho	1050.52	1194.25	1217.17	1090.14	1138.85	798.042	907.589	854.7	854.4	865.204
(E)-2-Methylbutanal oxime	104.045	116.874	118.329	88.2795	102.011	45.3025	57.8706	46.6684	52.4571	51.9377
FAD	2060	2147.03	2203.36	2046.73	2049.17	1796.22	1816.86	1771.89	1863.17	1778.63
Dihydrodigitoxin	49.4806	59.3182	57.7146	53.9534	38.403	24.9821	34.8643	16.7246	27.5556	15.466
Porphobilinogen	148.577	150.786	159.384	121.781	128.156	84.7734	103.636	83.6907	92.5328	82.6061
PG(a-25:0/LTE4)	991.502	1002.93	1046.06	929.928	958.103	826.692	885.432	812.537	829.153	843.469
Hydroxymethylphosphonate	52.6479	55.9501	52.4209	51.7991	56.4307	33.5495	37.7565	41.3111	32.9455	36.8673
Nandrolone phenpropionate	443.327	456.541	459.283	437.254	459.263	374.41	372.567	376.386	344.785	363.32
Tacrolimus	112.303	107.053	105.227	112.501	117.161	65.5353	54.9092	74.7931	45.8098	76.9428
Sphinganine	84.0933	84.5149	87.0133	87.0157	80.8926	51.4854	56.172	58.1519	44.8755	67.2962
Demethylphylloquinol	117.498	121.522	119.289	119.966	103.99	63.9004	70.9008	84.3394	52.2082	82.5559
alpha-Cadinol	321.57	324.386	315.398	308.344	317.169	264.128	264.66	273.472	277.993	285.04
Methyl dehydroabietate	377.178	366.147	369.04	372.505	368.156	316.307	312.274	329.045	320.59	329.358
3-Hexaprenyl-4,5-dihydroxybenzoate	1711.45	1678.65	1799.62	1713.56	1650.42	1137.87	1179.91	1196.02	1133.32	1309.91
Piperidine	718.958	711.857	745.1	700.733	701.264	585.878	589.386	595.715	575.431	608.86
Lubiminol	1544.22	1668.05	1695.09	1583.48	1560.97	972.111	1029.09	987.964	1079.62	1209.53
Mepindolol	691.088	711.832	730.545	698.564	679.744	530.103	509.947	522.918	530.068	574.812
managlinat dialanetil	1067.12	1036.25	1027.69	1010.46	1029.88	674.398	724.799	710.751	721.98	805.848
5-Ethyl-2,4-dimethyloxazole	66.8778	62.9641	64.2104	61.4757	59.596	33.7503	33.5712	34.7452	40.1424	43.8077
3-Isovalidene-3alpha,4-dihydrophthalide	131.566	117.137	121.249	115.76	116.812	77.0398	77.1837	76.8291	79.9831	87.2214
Capsianoside II	1645.13	1657.42	1655.06	1583.82	1539.93	1344.76	1298.77	1330.51	1335.35	1391.46
Ergonovine	930.272	903.333	890.607	854.477	807.049	548.888	516.43	517.618	530.714	635.848
N-Methyl-2-pyrrolidinone	86.7168	87.9535	87.5997	83.3971	81.7163	70.6563	70.3682	68.4387	60.5847	72.5357
1α,25-dihydroxy-11α-vinylvitamin D3 / 1α,25-dihydroxy-11α-vinylcholecalciferol	77358.2	77000.2	77231	75426.2	73927.9	65844.5	65614.9	66102.2	63052.8	69989.2
Sphingosyl-phosphocholine	11167.8	11118	11249.9	10714.4	10237.7	8780.89	8605.24	8778.31	8241.22	9332.86
Hygromycin B	1527.71	1568.25	1550.27	1507.99	1610.68	1337.52	1283.13	1284.03	1259.33	1310.35
Gentamicin A2	95.1833	93.3534	98.2157	101.772	95.6758	23.5152	32.8573	29.3604	19.6269	44.1287
Oleoylethanolamide	235.829	244.516	243.532	235.616	238.706	174.988	175.985	174.007	162.812	194.134
5(S)-HpEPE	1614.42	1623.57	1632.12	1653.35	1583.6	1319.91	1289.53	1295.13	1194.68	1309.35
Arginylarginine	154.445	157.105	157.537	153.205	150.95	101.086	100.569	102.051	85.9262	103.684
Trihydroxycoprostanoic acid	12287.9	12237.7	12496.2	12167	11904.3	9815.16	9626.36	9659.12	9398.34	9810.99
5-Methyl-2,5-di-1-pyrrolidinyl-2-cyclopenten-1-one	1080.88	1082.69	1068.85	1063.8	1035.42	710.993	697.086	719.465	675.755	702.759
4-[5]-ladderane-butanoic acid	1343.81	1344.54	1351.85	1327.06	1280.9	796.582	803.143	822.056	745.952	794.188
Docosahexaenoic Acid ethyl ester	122972	122161	121105	120281	118465	78062.2	78271	79566.9	73903.6	78919.4
Avocadene 4-acetate	410.782	428.074	415.055	403.333	409.154	305.275	295.094	312.553	289.856	313.795
3,4-Dihydrocadalene	399.804	403.385	399.783	373.744	375.07	235.648	243.182	241.883	207.911	245.211
7-Deoxyloganetic alcohol	333.106	339.915	324.569	314.01	311.085	165.843	166.188	186.558	149.966	172.485
(+/-)-trans- and cis-2-Hexenal propylene glycol acetal	460.027	469.189	464.873	459.975	475.213	390.187	413.607	373.604	385.941	381.854
PC(DiMe(11,5)/PGE1)	417.265	450.865	447.216	467.184	477.154	351.438	342.804	313.754	314.755	311.97
Ribostamycin	57.3121	52.5709	51.9404	65.0427	63.8437	17.9284	17.8143	10.8016	4.92126	2.86387
PS(18:1(11Z)/20:5(5Z,8Z,11Z,14Z,17Z))	167.172	163.415	165.976	170.567	177.213	116.257	111.564	107.994	105.053	104.905
Selagine	87.5938	88.5007	85.4749	90.4512	88.4202	55.3651	47.2906	50.0166	43.8942	44.2612
7A-Methyl-19-nortestosterone	327.057	332.813	326.836	325.623	331.264	254.683	242.795	243.876	231.195	241.215
Palmitaldehyde	1738.52	1753.45	1813.13	1667.58	1799.96	1262.37	1222.53	1097.43	1112.4	1112.77
Norharman	62.7299	60.1395	62.9651	56.8228	65.4201	35.3333	34.9121	33.1667	31.245	28.9031
Leukoaminochrome	102.021	100.12	89.2686	118.67	125.176	60.8462	62.8878	56.4888	53.1169	62.5475
L-Palmitoylcarnitine	185.449	193.952	206.784	260.829	337.35	40.9774	59.5619	26.6098	23.3686	63.681
SM(d16:1/PGE2)	251.95	239.773	245.317	282.038	287.028	138.333	167.586	156.125	137.508	136.912
Martynoside	64.0734	62.3232	58.1539	84.6221	80.731	18.1462	25.5781	13.8736	20.8604	18.3084
13,14-dihydro-15-keto-tetranor PGF1β	1031.82	1023.75	1026.18	1078.09	1054.92	868.01	864.847	847.684	892.687	856.8
N-Acetylisoleucine	658.537	639.147	640.486	676.438	664.794	537.172	524.084	529.245	532.413	532.538
MG(0:0/21:0/0:0)	98.727	87.2814	90.5076	111.572	113.081	13.252	12.1646	13.6476	24.1151	15.1538
17alpha,20alpha-Dihydroxycholesterol	6117.86	6154.49	5969.75	6388.11	6446.7	4056.93	3980.09	3537.73	3832.08	3929.59
3alpha,7alpha,12alpha-Trihydroxy-5beta-cholestanoate	109.624	108.638	103.96	120.13	119.634	45.6539	40.1978	36.9123	41.0391	46.6049
delta8,14-Sterol	11306.8	11313.5	11119.3	12374.1	11808.9	8419.96	7821.39	7792.19	8002.12	7966.19
PG(18:0/PGF1alpha)	3782.71	3794.01	3849.61	4391.14	4217.55	1974.15	1940.04	1892.56	1921.34	1959.82
4,4-Dimethyl-5alpha-cholesta-8-en-3beta-ol	1130.49	1111.9	1079.87	1224.8	1217.14	548.249	441.587	529.804	521.735	545.685
Feruloylputrescine	489.706	540.051	421.347	595.863	597.831	7.79336	4.03e-07	8.24143	4.03e-07	9.62946
Peperinic acid	2700.33	2673.45	2429.77	2866.18	2741.22	1274.75	1297.55	1267.29	1345.83	1351.36
N-Acetylcadaverine	88.259	79.123	74.5805	91.9892	95.8577	30.4541	33.6278	31.3416	34.6038	34.5212
PS(14:1(9Z)/18:4(6Z,9Z,12Z,15Z))	119.91	113.604	98.5067	143.101	141.397	28.6063	27.5174	30.28	23.4747	25.454
Norendoxifen	171.345	156.023	164.114	188.883	202.494	38.6042	28.6404	35.2115	15.561	24.7736
PE(14:1(9Z)/PGE2)	253.036	255.329	253.63	288.571	300.157	77.6848	79.4327	72.9019	56.883	43.9744
DG(17:0/20:5(6E,8Z,11Z,14Z,17Z)-OH(5)/0:0)	310.694	326.027	331.953	368.531	388.229	110.279	105.479	98.1762	106.152	103.083
Cyclosomatostatin	269.826	268.723	268.821	332.83	336.636	68.268	73.1007	75.7556	67.316	65.7164
PC(DiMe(13,5)/PGF2alpha)	366.917	341.62	333.208	472.165	474.673	2.4461	3.82757	3.76402	10.3775	4.07413
Taxa-4(20),11(12)-dien-5alpha-ol	291.341	302.777	284.73	422.323	401.893	0.946097	4.68929	5.18177	2.96439	0.66343
Oleandrin	66.2788	69.3588	62.5355	77.6874	79.1735	13.5513	9.86596	22.5658	11.5634	21.7559
Coumarin-4-carboxylic acid	165.266	171.217	169.526	181.075	176.473	128.071	125.137	128.504	132.11	133.166
1-Palmitoyl-2-hydroxy-sn-glycero-3-phosphoethanolamine	526.772	576.719	558.078	644.781	611.25	208.111	193.254	248.135	218.567	256.639
Q-VD-OPh	1125.14	1134.54	1125.09	1153.22	1137.42	1018.49	1017.04	1025.38	1028.55	1045
Santene hydrate	514.923	529.653	541.204	533.341	599.978	354.6	339.141	347.404	368.771	351.434
CDP-DG(20:4(5Z,8Z,11Z,14Z)-OH(20)/20:1(11Z))	1082.93	1139.84	1099.08	1130.7	1193.21	811.426	782.902	737.255	825.119	784.78
PC(P-18:0/20:5(5Z,8Z,11Z,14Z,16E)-OH(18R))	524.325	520.597	541.921	542.68	568.051	337.38	334.693	321.418	360.487	334.76
PE(22:0/PGF1alpha)	26.9766	27.4941	29.9739	32.4281	35.9787	7.32102	6.50434	3.29899	8.92516	6.7308
Hoduloside I	2177.62	2194.58	2214.82	2228.93	2243.67	1970.43	1931.24	1909.71	1930.02	1931.76
Chloroxanthin	980.545	1002.62	1005.94	1018.25	1040.34	721.813	712.94	710.463	699.8	726.04
(2R,3R,4R)-2-Amino-4-hydroxy-3-methylpentanoic acid	413.482	413.127	456.435	432.141	465.474	259.175	248.255	244.09	223.29	242.195
5-O-beta-D-Mycaminosyltylonolide	3983.82	4016.24	4022.14	4108.79	4324.23	1988.75	1794.86	1789.3	1797.85	1764.2
5-Hexenyl glucosinolate	31.8171	33.7224	32.6274	33.6494	37.8977	7.00797	1.21131	3.03591	2.3336	4.29241
Glucorhein	109.432	102.432	122.365	123.278	129.278	47.7062	37.6577	39.5168	46.7838	42.3258
Hypoxanthine	10472.2	10300.7	10552.6	10691.4	10659	8951.44	8649.52	8782.69	8952.63	8859.78
8,11-eicosadiynoic acid	14559.2	14042.4	14441.8	15611.6	15289.4	6807.13	6078.89	6284.8	7060.6	6724.39
(2R,4S)-4-Carbamimidamido-3-acetamido-2-((1R,2R)-2-hydroxy-1-methoxy-3-(octanoyloxy)propyl)-3,4-dihydro-2H-pyran-6-carboxylic acid	16796	16814.9	16879.2	17609.1	17463.2	11559.2	11484.5	11333	11890.6	11679.1
5alpha-Tomatidan-3-one	44767.7	44687.3	44946.2	45832	45574.5	37692.6	37440.2	37370.6	38407	37803
15-Deoxy-Delta12,14-PGJ2	1576.34	1522.16	1544.08	1700.91	1628.9	517.42	528.43	451.854	561.777	548.434
Indican	20268.6	19819.7	20552	20983.3	21069.5	12709	12746.9	12815	13546.8	13286.5
Taxiphyllin	6619.55	6437.2	6771.23	6904.7	6944.76	3886.92	3947.03	3974.68	4160.69	4081.55
5-(2-Aminopropyl)-2-methylphenol	91.7646	85.301	91.9407	93.4439	96.1238	42.0758	40.544	38.6847	42.9549	43.5543
DG(13:0/20:5(5Z,8Z,11Z,14Z,16E)-OH(18R)/0:0)	4690.03	4277.71	4672.45	4985.76	5217.08	1181.42	1194.25	1064.43	1243.95	1494.08
3-Methylbutyl 3-oxobutanoate	91.5354	88.6884	97.3341	107.374	109.001	4.03e-07	4.03e-07	4.03e-07	4.03e-07	4.03e-07
Cerebrosterol	904.618	886.356	957.883	980.292	978.723	446.393	442.254	435.314	425.559	448.094
11(Z),14(Z),17(Z)-Eicosatrienoic Acid	1524	1575.99	1659.81	1689	1764.14	377.291	380.462	345.665	402.83	398.683
3-Oxo-carbofuran	14551.2	14720.6	15430.4	15617	15841	6156.46	6134.84	6255.62	6412.32	6347.17
PA(18:2(9Z,11Z)/PGD2)	3670.82	3690.91	3768.73	3905.59	3859.23	2213.24	2237.53	2185.96	2249.42	2310.98
Antroquinonol	1061.78	1073.78	1130.21	1175.01	1209.51	289.387	276.89	265.815	295.808	296.763
DG(16:0/5-iso PGF2VI/0:0)	156.205	162.308	158.336	168.108	174.043	107.431	108.781	115.244	87.1967	108.198
Capsicoside A1	343.371	359.88	342.52	389.095	378.599	272.634	294.717	306.79	250.271	283.749
Methacholine	155.608	155.124	157.861	162.404	155.611	131.267	130.924	144.818	128.183	137.317
Momordicinin	77.3474	79.6541	90.3973	100.229	81.8766	37.8821	44.6023	48.9943	29.5272	34.5406
Pyrohyperforin	1825.38	1798.13	1803.69	1883.43	1812.86	1529.6	1631.77	1640.95	1572.64	1621.82
Hericene A	661.082	590.69	762.744	1003.73	950.32	75.5668	315.308	240.49	104.989	344.014
8,10-Hexadecadiynoic acid	379.557	382.21	385.852	403.875	396.354	330.324	328.404	345.8	337.054	340.479
Avenoleic acid	1861.61	1870.6	1910.86	1912.92	1919.24	1740.82	1722.98	1771.85	1715.74	1761.67
2,6-Dihydroxypseudooxynicotine	31.3075	28.0573	29.1823	29.7948	32.5381	20.1471	21.6402	23.834	21.3883	22.6723
hydroxybutyrylglycine	769.459	750.037	760.223	766.155	811.032	609.588	624.473	629.198	605.076	622.564
Cymathere lactone	255.999	238.519	240.667	250.382	255.464	199.713	212.602	213.759	191.26	197.969
Tomatidine	505.878	489.185	490.307	487.328	510.78	372.553	407.913	405.715	357.999	401.628
2-amino-3,7-dideoxy-D-threo-hept-6-ulosonate	649.106	647.626	620.494	644.135	641.367	528.882	545.442	558.516	546.112	534.035
3-(4-Isopropylphenyl)propanal	515.252	519.427	496.172	527.715	514.477	451.872	455.057	457.249	444.222	450.596
beta-Ionol	442.467	451.791	440.579	452.426	439.899	352.908	358.234	376.475	360.08	361.537
N-Trimethyl-2-aminoethylphosphonate	1945.56	1886.85	1825.87	1947.68	1869.95	1526.75	1495.93	1603	1520.18	1576.05
Nervonic acid	374.313	392.109	380.114	416.688	409.313	269.005	271.561	291.673	256.914	249.382
25-hydroxyvitamin D3	242.041	250.671	248.282	250.283	248.255	145.022	154.73	150.988	137.99	146.695
Palmitoleic acid	123.007	124.422	118.969	126.115	125.398	89.0809	87.1758	89.9056	88.0318	89.8135
Iloprost	553.258	622.29	583.534	610.605	580.932	423.527	418.4	469.807	418.745	458.007
Icosadienoic acid	129.785	140.495	138.554	138.602	133.381	83.9439	91.1627	107.488	96.4663	109.528
L-Gizzerosine	271.027	272.28	277.028	277.014	285.064	242.658	239.039	246.896	249.936	242.557
2-Phenylethyl octanoate	404.631	402.505	406.754	414.243	406.396	342.221	347.566	363.99	369.961	361.462
PI(20:3(5Z,8Z,11Z)/TXB2)	1657.38	1648.17	1692.16	1699.65	1722.58	1494.74	1494.24	1460.59	1523.89	1559.77
PE-NMe(22:2(13Z,16Z)/22:6(4Z,7Z,10Z,13Z,16Z,19Z))	1534.52	1658.89	1660.22	1730.85	1664.34	1211.27	1289.19	1243.22	1383.84	1337.26
PI(18:2(9Z,12Z)/PGF1alpha)	3732.12	3772.56	3796.03	3899.97	3876.89	3012.39	3278.25	3227.52	3355.01	3336.73
3,5,8-Trihydroxy-3',4',7-trimethoxyflavone	556.511	612.789	645.44	587.522	656.288	450.713	452.088	457.888	493.41	513.069
Sterol	15.5024	18.0464	18.7599	19.1364	20.843	9.16376	8.32368	10.346	11.2157	13.6727
SM(d16:2(4E,8Z)/PGJ2)	174.456	208.087	189.218	175.218	206.58	84.5236	93.9553	96.6399	126.924	136.175
1,2-Dioctadecanoyl-3-(galactosyl-B-1-6-galactosyl-B-1)-glycerol	1308.27	1410.69	1378.73	1333.54	1371.59	1157.6	1116.74	1198.4	1223.41	1245.42
Dimethylsphingosine	323.167	342.688	348.759	333.85	329.075	237.017	239.502	226.241	255.963	259.921
Ginsenoyne N	4722.87	4729.81	4996.15	4831.36	4749.13	3353.38	3309.97	3329.39	3744.99	3857.92
Licoricesaponin G2	4738.55	4825.46	4982.11	4822.1	4862.73	3825.97	3935.96	3838.73	4061.33	4058.1
DG(8:0/5-iso PGF2VI/0:0)	8716.97	8826.07	9207.58	9024.35	8818.2	6913.66	7172.3	7109.34	7569.35	7351.86
Leukotriene B4 ethanolamide	4535.48	4639.79	4908.32	4723.58	4698.52	3721.13	3805.58	3774.23	4063.74	3983.84
Hexanoylglycine	2024.89	2008.75	2073.76	1947.27	1930	1524.5	1602.01	1603.1	1686.22	1597.25
DG(5-iso PGF2VI/8:0/0:0)	28463.5	28387.8	30107.6	28227.6	27920.7	17641	18862.3	19273.5	20262.8	20090.9
Formoterol	4238.16	4121.26	4206.37	4190.18	4038.31	3355.26	3422.24	3416.28	3517.18	3498.7
LysoPE(0:0/20:3(8Z,11Z,14Z))	8228.37	8093.98	8151.25	8175.15	8083.29	6622.75	6881.25	6833.82	7148.79	6850.26
Arg Trp Leu His	21372.2	21034.5	21691.4	21138.4	21096.4	15498.2	15979.5	16409.8	17391.6	16098.5
6b-Angeloyl-3b,8b,9b-trihydroxy-7(11)-eremophilen-12,8-olide	960.996	950.776	942.621	984.888	935.771	804.733	804	770.266	843.461	823.003
DG(12:0/18:3(10,12,15)-OH(9)/0:0)	921.279	923.492	946.142	958.388	904.07	763.023	753.181	736.147	804.249	788.509
Cicaprost	4651.51	4574.95	4627.17	4634.9	4525.52	4200.46	4189.17	4275.41	4319.14	4321.51
DG(2:0/20:4(6Z,8E,10E,14Z)-2OH(5S,12R)/0:0)	2360.75	2381.27	2386.19	2404.1	2371.45	2139.21	2134.68	2169.65	2227.56	2196.29
Coumaperine	538.621	523.807	553.969	544.704	538.073	369.391	375.191	406.863	418.061	419.326
Dehydroisochalciporone	638.498	634.408	639.213	638.418	642.767	478.669	489.787	490.988	511.253	517.516
alpha-Valerenol	15824.4	15659.3	15765.2	16002.5	15864.3	11731.2	11794.2	11915.3	12416.8	12937.5
Diprafenone	300.121	295.954	281.278	270.445	295.375	188.35	197.277	195.213	183.116	227.885
Glycerol 1-myristate	876.45	878.703	867.632	876.671	890.488	719.196	722.727	708.319	770.01	793.785
FAPy-adenine	849.408	856.5	849.02	852.873	871.455	713.634	733.123	753.003	764.372	780.401
Sufentanil	260.627	279.689	272.539	269.702	283.393	215.411	217.084	219.858	222.908	239.831
PG(20:4(8Z,11Z,14Z,17Z)/PGF1alpha)	2830.08	3108.19	3077.97	3076.72	3035.4	2087.75	2235.96	2072.93	2259.3	2172.14
PS(TXB2/22:1(13Z))	544.146	595.736	602.628	595.068	596.054	417.787	445.913	424.05	447.802	446.687
Oryzalide B	1034.49	1066.1	1066.43	1044.24	1047.02	826.93	850.311	828.351	840.14	866.031
Phorbol-12-monomyristate	1766.51	1828.59	1837.62	1783.72	1787.9	1053.98	1090.89	1053.71	1102.81	1119.77
p-Coumaroylagmatine	920.662	1005.61	1064.17	887.706	962.8	298.029	386.88	314.626	347.179	355.051
Dihydrokainic acid	1902.8	1995.85	2113.27	1955.54	1999.61	1209.05	1225.24	1190.4	1208.8	1212.73
Gibberellin A20	695.625	717.74	739.787	720.53	727.219	533.964	566.079	560.83	561.138	579.34
N-[(3s)-2-Oxotetrahydrofuran-3-Yl]butanamide	54.9856	59.8846	63.1271	57.7443	63.3266	20.4613	24.284	22.7396	27.4264	28.4055
6-Hydroxynicotinate	150.324	155.642	175.618	155.257	169.498	48.9031	50.6958	53.757	59.6109	56.146
16alpha-Hydroxyandrost-4-ene-3,17-dione	4040.92	4095.88	4391.53	4068.86	4175.69	2896.11	2980.29	2971.03	3083.99	3041.92
Epothilone B	1931.66	1998.21	2010.26	2093.52	2051.43	1459.95	1431.15	1341.67	1493.25	1510.44
2-(5'-methylthio)pentylmalate	202.147	207.456	210.025	222.182	212.408	105.432	107.186	106.123	125.364	115.448
cis-4,10,13,16-Docosatetraenoic Acid	5594.43	5510.85	5902.57	6144.84	6049.82	3146.27	3219.9	3002.46	3187.89	3217.54
2-Arachidonoylglycerol	1795.25	1765.71	1922.02	1994.76	1949.6	1054.5	1085.56	1007.04	1091.6	1118.78
DG(PGJ2/2:0/0:0)	5714.54	5948.11	6008.76	6067.84	6216.16	4375.85	4539.12	4389.43	4561.93	4543.82
PA(22:5(4Z,7Z,10Z,13Z,16Z)/20:0)	1480.73	1589.39	1650.75	1635.18	1668.79	734.5	843.118	761.328	811.971	788.199
2-[[3-Cyclohexyl-1-[2-[3-(diaminomethylideneamino)propylcarbamoyl]piperidin-1-yl]-1-oxopropan-2-yl]amino]acetic acid	9676.76	9957.39	10041.8	9949.49	10107.1	8389.75	8186.35	8363.3	8693.98	8500.46
Ibrutinib	975.3	1035.21	1083.48	1088.9	1050.75	594.132	607.96	600.66	662.023	630.503
SM(d18:1/PGJ2)	3684.61	3952.81	4152.27	4152.71	4125.16	1780.04	1829.7	1838.56	1967.04	1896.13
Pregnenolone	1536.66	1601.84	1517.86	1553.8	1632.99	1148.58	1215.63	1171.06	1197.68	1157.07
1-O-Hexadecyl-2-O-ethylglycero-3-phosphoric acid 4-(N,N-dimethylamino)pyridinium butylester	1243.49	1310.36	1265.6	1258.7	1311.05	1020.3	1075.85	1009.43	1075.88	1080.21
cis-9-Palmitoleic acid	471.174	513.075	455.235	483.522	471.867	328.946	327.667	331.808	355.054	349.114
12-OPDA	847.037	898.95	838.842	849.235	864.66	630.704	647.835	659.519	691.642	629.958
HUPERZINE A	206.982	207.19	194.219	198.45	205.021	113.388	113.548	123.322	127.141	115.281
beta-Ionone	1677.16	1695.8	1680.74	1711.53	1696.47	1354.83	1353.86	1406.13	1427.43	1382.76
alpha-Santalal	1134	1150.87	1122.93	1180.65	1144.23	914.371	909.583	943.513	983.362	931.38
Galaxolide	1792.12	1808.39	1780.26	1855.71	1846.98	1497.14	1512.68	1549.69	1538.55	1529.59
Sphingosine	180.792	187.824	186.496	207.704	205.417	79.2425	72.3663	85.4808	93.5933	76.7379
4-Oxo-13-cis-retinoate	6718.24	6782.82	6667.59	6951.5	6925.89	5056.57	5126.89	5142.32	5291.71	5131.63
solasodine 3-O-beta-D-glucopyranoside	5269.53	5249.84	5205.09	5405.46	5389.8	4412.03	4429.4	4419.06	4525.41	4429.03
N-Oxide abiraterone sulfate	2748.51	2721.35	2717.02	2884.83	2803.64	2059.19	2188.46	2265.4	2258.15	2257.86
Dibutyl sulfide	158.563	159.534	153.602	166.153	163.096	119.551	125.089	131.394	133.352	129.086
13'-Carboxy-alpha-tocopherol	4333.52	4272.5	4253.28	4358.48	4306.42	3724.59	3745.63	3856.72	3876.78	3858.47
18-Hydroxycortisol	4692.49	4619.06	4629.91	4724.95	4712.5	4187.75	4194.99	4254.48	4310.69	4312.46
Hexadeca-7,10,13-trienoic acid	583.243	584.908	573.654	607.37	597.903	454.645	460.32	480.056	495.194	476.965
5,8,12-Trihydroxy-9-octadecenoic acid	10407.1	10214.5	10208.1	10530.6	10407	9435.34	9401.8	9366.76	9566.8	9497.5
Levonorgestrel acetate	1488.73	1458.28	1439.3	1510.62	1479.8	1225.07	1262.58	1229.88	1272.96	1263.13
PG(18:3(9Z,12Z,15Z)/PGE2)	1732.97	1755.16	1556.06	1804.06	1866.35	874.249	908.639	863.521	910.082	1043.5
Naringenin	271.726	269.329	248.883	295.816	284.25	177.117	162.868	170.967	179.852	189.504
Zearalenone	1408.76	1350.05	1370.58	1508.21	1488.77	815.185	882.566	866.381	972.578	988.669
1-(2,6,6-Trimethyl-2-cyclohexen-1-yl)-1,6-heptadien-3-one	286.686	284.084	270.202	291.889	289.931	202.474	211.706	218.767	218.506	229.215
Antheraxanthin	962.59	1042.86	971.281	1032.39	1013.94	761.846	698.973	784.234	772.431	792.778
2-((3-Aminopyridin-2-yl)methylene)hydrazinecarbothioamide	1386.22	1388.29	1360.28	1385.48	1397.44	1277.29	1228.88	1258.04	1285.91	1288.07
Kinetensin 1-3	22385.5	22074.9	22325.6	22650.3	22108.5	20172.1	20168.7	20263.7	20842.4	20485.7
Alfentanil	1064.5	1058.13	1087.63	1117.47	1051.14	854.135	866.214	859.685	897.27	891.696
Estrone	2952.63	2909.7	2907.6	3084.35	2980.64	2499.33	2424.72	2430.79	2607.91	2557.78
Cucurbitacin E	15395.2	15210.8	15194	15550.6	15223.7	14169.6	14022.3	14046.6	14369.8	14268.9
PI(PGJ2/18:2(9Z,12Z))	16746.1	16536.3	16842.4	17342.5	16951.6	14899	14429.1	14547.1	14995.5	15007.3
alpha-Hederin	3798.05	3855.09	3828.15	3978.12	3910.91	3248.64	3164.99	3230.33	3368.28	3290.82
Phytosphingosine-1-P	2603.51	2584.56	2592.58	2648.89	2631.95	2203.17	2151.74	2192.85	2270.75	2229.54
Leptomycin B	2791.86	2861.18	2770.6	2872.75	2931.65	1826.58	1928.88	1957.55	1977.09	2097.84
3-Hydroxysebacic acid	263.32	276.644	262.413	267.395	271.829	145.558	153.492	152.266	165.271	174.309
(2-Acetyloxy-3-hydroxypropyl) (E)-octadec-9-enoate	724.64	775.137	755.753	768.821	758.97	449.12	479.925	476.914	513.767	537.231
IL-1R Antagonist	1392.91	1380.81	1343.95	1423.83	1426.83	1037.56	1028.42	1095.19	1095.34	1138.07
Cholylasparagine	2250.75	2239.41	2197.22	2262.98	2245.29	1912.55	1936.16	1915.99	1974.38	1977.14
Germacrenone	538.495	539.935	532.227	550.382	556.282	367.221	372.896	370.497	400.067	391.837
Polyporusterone A	2431.05	2405.63	2356.73	2476.15	2465.88	1546.35	1626.96	1614.82	1676.71	1665.27
2-Hydroxy-p-mentha-1,8-dien-6-one	321.211	306.118	308.634	320.534	316.072	173.369	178.852	177.818	195.809	202.049
5beta-Cyprinolsulfate	1133.55	1131.9	1118.58	1138.7	1129.71	1014.98	1002.46	1007.85	1052.48	1042.47
N-Linoleoyl Lysine	12715.9	12622.4	12683.6	13101	12704.6	10608.5	10266.1	10719.7	11135.7	11083.7
PG(PGF2alpha/a-21:0)	2765.21	2772.49	2807.78	3012.03	2841.49	2050.92	2093.09	2007.93	2273.84	2156.95
Stigmastentriol	3401.79	3417.66	3423.15	3760.12	3671.26	2001.66	2084.99	1963.49	2499.89	2346.18
alpha-Linolenic acid	856.22	886.405	897.57	935.848	922.984	626.399	628.868	617.767	680.534	702.748
Mabioside A	895.688	885.867	930.722	926.229	927.115	705.685	681.715	704.76	759.735	746.549
11-(3,4-dimethyl-5-propylfuran-2-yl)undecanoylcarnitine	28408.5	28300.6	29252.1	30067.9	29604.1	19309.4	19160.8	19718.6	22028.7	21511.1
DG(8:0/22:6(4Z,7Z,11E,13Z,15E,19Z)-2OH(10S,17)/0:0)	1221.62	1138.4	1834.59	1690.6	1849.89	820.987	809.98	877.998	810.641	856.994
[5-(Aminomethyl)furan-3-yl]methyl diphosphate	114.924	121.287	135.115	130.115	155.352	82.2305	86.0603	81.3732	82.2145	91.5897
Urolithin C 3-glucuronide	172.682	158.895	182.277	183.657	195.314	135.198	135.283	136.659	137.437	138.99
L-threo-sphinganine	963.606	987.007	1062.08	957.035	1066.94	913.215	848.828	853.453	859.91	877.911
DG(15:0/18:4(6Z,9Z,12Z,15Z)/0:0)	1519.01	1741.92	1799.7	1694.21	1789.81	1416.31	1277.75	1152.58	1310.15	1392.67
CDP-DG(PGF1alpha/20:2(11Z,14Z))	243.549	235.574	231.538	289.554	268.646	191.822	205.591	181.02	200.29	209.93
[(2R,3S,4S,6R,7S,8R)-4-Ethenyl-3-hydroxy-2,4,7,14-tetramethyl-9-oxo-6-tricyclo[5.4.3.01,8]tetradecanyl] 2-[2-(diethylamino)ethylsulfanyl]acetate	4017.48	4010.64	3897.63	4105.39	4085.37	3616.47	3366.87	3243.33	3616.88	3605.37
Avermectin A1b monosaccharide	143.374	149.884	137.324	146.387	142.933	111.472	112.716	103.887	113.141	133.054
Tuberoside	23200.2	23215.4	22726.3	24654.7	24172.7	22148.7	21351.7	20927.8	21888.1	21546.4
Didemnin	182.586	153.477	91.2267	190.482	262.258	39.7809	23.199	17.2759	39.0482	41.0388
24-Acetyl- 25-cinnamoylvulgaroside	1252.14	1256.35	1146.82	1277.84	1297.48	1101.9	1061.34	1063.77	1137.27	1134.72
DG(14:1n5/0:0/20:4n6)	1786.63	1739.54	1190.44	2035.19	1934.16	984.733	980.021	907.267	1106.06	1172.33
methyl (E)-2-methyl-4-((3aS)-1-methyl-5-oxo-2,3,5,8a-tetrahydropyrrolo[2,3-b]indol-3a(1H)-yl)but-2-enoate	144.363	147.385	146.685	170.66	163.066	121.818	119.606	117.541	137.12	120.763
(R)-Rhazinilam	529.843	519.245	520.28	572.541	551.212	412.591	398.226	395.931	468.433	369.41
CDP-DG(PGJ2/i-22:0)	143.797	137.653	138.166	213.581	192.327	65.2987	66.6695	81.0473	76.5145	70.8955
Leu-Arg-Asn-Arg	330.818	326.911	335.097	359.563	350.144	292.999	287.946	289.882	291.452	295.962
Phenacetyl-carnitine	589.984	592.422	545.175	773.305	786.477	207.227	227.503	140.029	264.169	218.179
Aculeacin A	278.117	265.925	253.936	313.032	283.486	154.082	155.055	159.179	175.924	151.071
Digitoxigenin bisdigitoxide	3236.79	3192.78	3236.7	3308.84	3297.29	3067.24	3079.96	3074.75	3148.11	3093.9
Ginsenoside Rg3	19791.3	19298.6	19896.9	22948.1	23601.8	14759.9	15444	15618.6	16664	15802.6
(1S,2R,3S,7R,10S,13S,14R)-1-Methyl-14-propan-2-yl-2-propyl-12-azapentacyclo[8.6.0.02,13.03,7.07,12]hexadecane	102.996	100.411	105.563	196.888	217	0.380159	0.616069	4.03e-07	3.36171	4.03e-07
PE(18:0/20:4(5Z,8Z,11Z,14Z)-OH(20))	526.289	582.889	714.19	898.276	891.19	272.441	258.334	269.65	321.128	320.245
1α,25-dihydroxy-26,27-dimethyl-22,22,23,23-tetradehydrovitamin D3 / 1α,25-dihydroxy-26,27-dimethyl-22,22,23,23-tetradehydro-cholecalciferol	14439.3	14444.6	14734	15689.4	15357.5	12331.1	12393.5	12413.7	12882.5	12777.5
Buspirone N-oxide	1228.12	1207.53	1064.42	1285.84	1458.28	630.766	700.427	691.364	738.579	759.279
9,10-DHOME	11726.6	11704.1	11472	11822.7	11907.5	10885.1	10877.1	10949.4	11081.4	10999.2
1,11-Triacontanediol	190.387	209.585	153.791	253.205	271.026	61.7913	73.2665	61.5575	81.9498	59.0355
N-Myristoyl Proline	766.441	793.5	752.897	808.099	808.356	629.879	667.54	666.484	658.019	675.071
(4E,7E,10E,13E)-Hexadeca-4,7,10,13-tetraenoic acid	97.7099	100.053	100.683	110.823	106.629	74.098	80.7305	80.5434	80.1136	83.2304
7-hexadecynoic acid	59.6481	61.829	62.3421	66.3247	65.1678	38.0966	40.0092	45.7938	42.1605	45.8096
Geijerone	212.743	213.718	208.679	220.882	221.373	174.963	180.001	181.717	171.166	179.891
Valylisoleucine	439.568	440.804	432.3	468.525	452.426	373.103	373.127	392.961	377.375	379.433
TYLVALOSIN	2034.85	2081.61	2129.89	2203.5	2146.27	1992.72	1994.85	1903.88	1886.97	1836.14
Undecylenic acid	226.036	218.453	235.865	241.331	225.752	201.537	191.445	196.428	186.238	172.143
Methionyl-Proline	15492.5	15220	15393.3	15210.1	15394.9	15042.3	14854.2	14598.9	14773.4	14613.2
Indolophenanthridine	2216.8	2265.59	2171.85	2234.02	2377.97	2098.52	2017.99	1934.69	1949.66	1899.97
LIPEGFILGRASTIM	220.333	211.626	199.825	208.171	223.147	180.003	177.296	162.546	179.646	158.946
4'-Oxolividamine	55.4185	53.9238	52.193	59.8771	55.774	48.2695	32.9954	35.8146	40.726	37.1957
Dodeca-6,8,10-trienedioylcarnitine	43.4519	46.736	49.4764	60.0186	38.5802	34.0181	11.1753	14.2512	25.2025	21.7818
midecamycin	49.8994	45.1227	50.4403	52.4313	47.0126	36.3198	28.5966	27.5094	27.3456	38.3363
Spisulosine	819.128	862.891	933.61	827.541	946.052	784.135	569.019	561.809	555.54	721.08
Butirosina	2663.57	2611.86	2578.09	2631.65	2582.4	2423.29	2476.86	2435.35	2390.15	2296.44
virginiamycin m1	5316.79	5306.45	5094.24	5218.95	5067.8	4503.87	4740.37	4633.5	4463.63	4318.83
17-HDoHE	29.4136	30.4331	28.6792	32.1529	27.3994	18.5412	19.7648	20.9984	17.6212	13.9877
Norlinolenic acid	227.028	232.785	218.251	225.93	215.318	148.005	138.643	152.538	144.397	118.964
Physagulin E	87.294	99.3555	88.121	82.2514	80.5366	43.0122	41.5447	43.5549	33.3322	22.9132
Lys Ile Asn	469.949	454.001	453.771	466.615	465.823	432.519	439.357	441.016	431.511	420.33
Lipid X	203.675	195.853	197.46	207.437	196.008	183.016	190.342	183.03	175.543	171.479
Cyclosquamosin B	92.1842	78.6186	96.0895	96.9253	122.449	34.5962	20.08	21.0474	27.072	10.6321
Torvoside E	145.566	145.092	142.819	153.021	152.504	116.743	114.98	106.766	111.029	101.64
Agavoside B	31.4412	35.3711	37.7061	46.7169	31.7409	9.91287	15.1752	10.1253	4.74162	12.2198
Citrusin II	146.59	165.438	161.845	209.59	165.648	125.548	111.811	105.671	101.113	108.321
PG(16:0/16:1(9Z))	82.0294	80.4784	78.1304	79.7126	69.8249	66.0476	58.4703	57.5105	53.5124	59.8154
Cholylphenylalanine	65.0153	84.6214	67.1781	77.7763	69.4829	22.9586	42.0685	14.5358	4.03e-07	20.6771
Fasciculic acid B	5145.19	4987.02	5028.78	5024.99	4859.55	4311.97	4533.67	4291.51	4046.26	4356.1
Dalamid	600.587	581.658	568.752	515.18	503.938	338.225	473.872	299.317	192.592	304.353
methyl 2-benzamidoacetate	195.166	199.959	186.351	181.146	193.277	156.259	175.272	141.341	143.161	149.511
5-Hydroxyvalproic acid	38.7517	38.9178	32.848	34.1735	35.5495	16.389	25.9701	17.4486	10.1234	18.9227
Ferulate	48.6228	44.1573	46.1316	41.2392	45.9339	35.8696	36.3802	33.4119	24.3827	31.6409
6'-Dehydro-6'-oxoparomamine	93.1591	91.4587	89.4637	88.0247	76.9566	66.2248	54.8118	56.717	50.2182	57.8422
Canarigenin 3-[glucosyl-(1->4)-6-deoxy-alloside]	104.964	104	104.115	101.022	95.9762	95.4818	83.6018	78.9848	77.4387	80.023
PG(18:3(9Z,12Z,15Z)/PGF1alpha)	202.494	195.219	201.358	201.892	200.756	144.634	152.844	158.39	172.043	127.432
Valylhydroxyproline	485.084	477.537	460.704	466.381	469.865	357.581	379.885	364.417	366.494	348.251
Squamolone	53.3317	50.9049	49.594	50.0934	49.0727	37.8776	40.5883	40.3465	39.4409	36.2682
Dihydroisolysergic acid II	184.77	172.011	155.483	170.236	172.307	103.023	103.424	103.052	118.495	88.4692
DG(18:3(6Z,9Z,12Z)/22:5(7Z,10Z,13Z,16Z,19Z)/0:0)	71.688	68.3852	67.2819	67.9435	69.5321	22.0957	29.0365	24.5767	33.0336	8.30148
(3beta,5alpha,6beta,22E,24R)-23-Methylergosta-7,22-diene-3,5,6-triol	183.295	169.657	164.263	165.076	180.818	73.3424	89.1433	81.9995	93.3473	64.9805
2-Hydroxydecanedioic acid	420.258	392.363	382.529	381.49	392.749	358.285	363.729	353.863	363.813	339.734
Dolicholide	3732.53	3695.05	3692.62	3692.13	3733.19	3553.57	3588.11	3555.97	3616.29	3478.94
3-Amino-3-(4-hydroxyphenyl)propanoate	3102.78	3071.22	3004.08	2955.53	3135.8	2792.24	2844.56	2824.36	2908.05	2774.83
5,7-Docosanedione	1587.25	1530.93	1525.6	1560.44	1542.46	1432.39	1364.83	1360.4	1361.08	1317.63
DG(12:0/22:6(4Z,7Z,10Z,12E,16Z,19Z)-OH(14)/0:0)	19300.1	18576.7	19279.1	19983.9	19150.1	17248.6	15192.7	15045.5	16094.5	14446.2
12-Ketodeoxycholic acid	564273	557827	565667	564749	564370	538415	528945	531309	543042	535831
Hymenoxon	255.56	252.012	246.247	261.389	269.897	186.687	168.526	172.185	203.526	172.652
H-Tyr-Phe-Leu-Phe-Arg-Pro-Arg-Asn-NH2	394.239	413.104	453.374	451.869	418.932	252.994	163.005	222.147	215.301	181.974
16-Hydroxyhexadecanoic acid	568.723	558.736	604.834	611.166	581.523	362.377	324.156	362.448	352.738	305.072
Maslinic acid 3-O-b-D-glucoside	420.917	429.178	446.574	430.858	440.956	356.997	346.099	329.426	360.938	334.226
Coffeasterene	393.031	414.803	421.136	407.323	439.327	214.056	186.915	206.45	228.009	133.752
Asiaticoside	161.725	188.832	183.939	190.971	185.113	107.841	81.8009	80.4471	105.016	68.3787
Elastin	20184.1	20438.6	19731	20725	22000.8	16906.8	16210.6	13914.3	15306.6	15619.4
(1alpha,3beta,20S,22R,24S,25S)-Pubescenin	8632.2	8493.2	8406.06	8992.11	9471.69	6685.14	6622.27	5762.4	6084.91	6344.84
CDP-DG(20:2(11Z,14Z)/PGF1alpha)	207.794	201.157	195.799	262.913	254.162	108.8	94.6901	74.3554	68.6067	59.0841
PI(6 keto-PGF1alpha/22:3(10Z,13Z,16Z))	216.462	197.314	209.779	254.218	250.402	92.3401	84.4883	70.6676	69.7977	48.4022
3-O-{beta-D-Glucopyranosyl(1_2)-[alpha-L-arabinopyranosyl(1_6)]-beta-D-glucopyranosyl}-oleanolic acid	628.66	642.693	646.174	668.771	636.615	455.718	520.124	431.372	503.563	421.854
2-Pentadecylfuran	87.0757	101.402	97.3929	97.3127	98.0537	35.4126	33.1273	30.1748	40.4056	35.765
Desglucocheirotoxol	3304.58	3406.55	3347.65	3493.79	3410.31	2735.71	2567.45	2501.5	2677.3	2597.33
(1Ar,3S,4aS,7S,8aS)-3-[(1S,2R,3R)-3-[(2R,5S)-5,6-dimethylheptan-2-yl]-2-(2-hydroxyethyl)-2-methylcyclopentyl]-7-hydroxy-4a-methyl-2,3,5,6,7,8-hexahydro-1aH-naphtho[4,4a-b]oxiren-4-one	138777	138938	137400	140780	139984	111011	108622	107008	116513	111909
3-Octaprenyl-4-hydroxybenzoate	249.639	291.503	255.196	298.681	322.732	147.729	146.487	134.513	162.615	126.498
(+)-Vulgraon B	129.014	134.385	125.794	136.165	134.932	98.2767	101.517	97.8121	99.4307	87.6363
29-Norcycloartane-3,24-dione	21768.9	21916.9	21820.7	22700.3	22088.8	18549	18557.4	18691.7	19107.6	17924.8
TG(15:0/20:2n6/20:3(5Z,8Z,11Z))	57.7838	63.786	52.5588	69.598	64.4147	3.93221	13.4193	6.63745	21.5322	4.03e-07
Cucurbitacin I	491.38	498.299	425.281	468.377	470.371	299.919	327.845	224.948	284.838	328.422
Demethyllactenocin	59.2316	66.876	51.3312	54.9209	59.0855	23.3834	31.1001	22.6839	39.0899	31.4547
3-Butyn-1-ol	56.7496	65.8364	42.919	60.984	63.5832	26.0773	26.7054	26.3104	26.4888	32.1043
Pro Ala Gly Gly	87.0652	81.6948	50.0714	96.8162	81.4504	11.6009	21.1629	10.9579	22.7202	5.65418
3-Amino-2,3-dideoxy-scyllo-inosose	32.7133	35.555	28.12	37.0608	36.3055	22.6748	23.8499	20.0928	25.9323	20.2708
Creatine	372.341	410.518	392.554	363.651	402.909	251.291	279.285	267.17	256	261.579
Prolylproline	426.816	466.144	471.928	418.211	461.559	193.486	200.412	202.393	178.239	176.83
Riboflavin	618.156	733.277	735.956	627.197	728.231	267.662	310.373	278.682	287.905	284.323
Panthenol	564.591	579.026	549.701	532.205	598.81	387.375	382.875	394.849	390.27	403.094
6-(Hydroxymethyl)-7,8-dihydropterin	1096.54	1135.49	1095.9	1051.67	1145.64	790.286	845.205	792.93	844.461	816.903
N2-Acetyl-L-aminoadipate	193.726	197.295	193.135	183.396	189.253	149.487	148.513	145.203	151.087	139.455
1-Hydroxytrimazosin	4696.33	4796.57	4681.55	4567.9	4895.91	3613.73	3369.85	3448.38	3541.79	3282.32
(S)-17-Hydroxy-9,11,13,15-octadecatetraynoic acid	210.787	215.867	208.379	205.994	211.175	165.26	159.214	156.069	162.957	159.162
Acetyl-Ser-Asp-Lys-Pro	3234.65	3218.43	3107.52	3088.93	3155.96	2676.91	2734.44	2699.86	2641.77	2529.05
Glutamine lactate	180.584	180.168	174.088	159.34	185.005	125.224	129.158	124.709	123.752	112.626
DG(10:0/PGE2/0:0)	1930.97	1954.41	1776.91	1928.46	1891.41	1638.17	1496.46	1429.91	1456.72	1421.72
Hebevinoside IV	2253.05	2392.1	2127.28	2226.41	2207.35	1680.76	1560.61	1439.55	1645.91	1576.54
rac-4-Hydroxy-4-O-(beta-D-glucuronide)-all-trans-retinyl acetate	1744.99	1835.59	1617.45	1631.44	1694.76	1170.67	1250.89	1179.12	1153.24	1185.76
N,N-Dihydroxy-L-valine	45.7025	43.398	34.7793	37.1979	40.7772	16.5662	17.1921	15.0511	15.5783	12.0146
9(10)-EpOME	123.155	123.871	109.596	115.049	115.498	88.5756	91.1984	81.9713	86.442	83.387
Glycinamide, glycyl-L-prolyl-	111.486	113.718	94.4808	117.216	107.158	61.6019	68.1554	56.5554	57.7699	53.4942
Demethylcitalopram	427.981	427.534	402.181	425.688	410.648	311.543	329.03	303.771	330.944	330.215
(1R,2R,4R)-1,8-Epoxy-p-menthane-2,4-diol	357.65	364.981	344.87	346.483	349.69	193.505	220.391	199.88	201.508	204.705
N-Demethyllysergic acid diethylamide	2819.4	2804.29	2651.86	2779.2	2786.47	1812.22	1911.45	1792.83	1822.35	1886.23
5-Methyldihydrofolic acid	123.87	114.611	95.7986	121.099	117.008	29.5106	34.0328	32.2133	39.8218	42.284
Tyr Tyr	172.136	169.942	145.763	165.144	171.769	56.0984	60.6236	59.9453	66.5905	68.4118
Brassinolide	9335.97	9504.88	8938.17	9257.08	9145.94	7198	7300.34	7013.73	7166.43	7225.53
p-Isopropylphenol	112.466	114.172	98.4393	108.389	104.585	61.7109	55.3068	51.9132	57.3675	61.2108
Basilimoside	16476.6	16196.3	14514.9	15971	16283.8	11714.6	10794.6	10682	11597.8	10669.9
N-Linoleoyl Isoleucine	14556.5	13959.4	13703.8	14277.2	14120.5	10683.2	10659.3	10157.2	10842.2	10766.7
(3R,5S,6R,7R,8S,9S,10S,13R,14S,17R)-6-Ethyl-17-((R)-4-hydroxybutan-2-yl)-10,13-dimethylhexadecahydro-1H-cyclopenta[a]phenanthrene-3,7-diol	1673.23	1662.11	1535.42	1699.22	1621.34	1245.14	1230.37	1111	1222.14	1219.74
17alpha-Hydroxyprogesterone	556.455	512.87	484.589	525.186	541.449	365.889	337.841	328.597	294.078	346.216
6-Geranylgeranyl-2-methylbenzene-1,4-diol	4151.07	4034.38	3984.99	4132.39	3907	3136.17	3029.34	2991.11	2967.81	2976.02
31-Hydroxy rifabutin	68.4644	60.748	63.4296	70.4053	62.3275	21.8989	11.808	4.05628	9.60076	9.22361
Loxoribine	66.6188	60.3326	66.612	52.9297	68.2208	42.9916	39.7534	49.383	44.1266	52.0193
Benzenediazonium	20.5014	18.3581	17.2206	18.2544	20.1107	10.8964	10.4889	12.714	13.7041	14.6749
2-Aminoheptanoate	239.549	238.866	230.561	233.717	236.521	192.998	193.647	199.164	202.171	212.265
8,8a-Diepiswainsonine	67.0172	54.5911	57.6591	46.2288	55.2993	15.2572	8.86058	22.7051	18.326	24.9984
Erythronolide B	456.979	436.883	434.796	419.19	437.56	356.972	334.261	389.189	360.931	387.652
Nordeoxycholic acid	2035.34	1959.64	1954.63	1915.77	1954.47	1865.24	1839.96	1855.39	1779.81	1798.47
3-Hydroxycotinine glucuronide	1084.42	1009.06	1024.14	1011.68	1015.28	953.727	895.984	941.971	882.75	924.612
(S)-Ureidoglycolate	99.8175	95.7717	95.5089	90.4033	89.8642	79.2893	79.2596	85.8161	75.5725	76.114
PA(22:0/PGE1)	385.335	380.825	346.612	367.083	371.629	309.363	268.088	295.227	230.38	239.125
Cer(t18:0/22:6(4Z,8Z,10Z,13Z,16Z,19Z)-OH(7))	315.888	324.032	318.073	306.235	257.981	157.144	90.6119	172.599	116.605	120.725
16-Acetylgitoxin	250.173	237.402	224.158	219.251	217.62	125.652	120.523	162.623	114.545	128.11
Ergosterol peroxide	2202.39	2196.87	2148.6	2191.73	2045.29	1305.08	1229.84	1376.63	1341.15	1399.25
sphingosylphosphorylcholine	1240.93	1237.97	1211.95	1231.74	1180.6	1040.26	988.215	1042.02	1066.73	1048.22
6alpha-Hydroxy-castasterone	2843.62	2789.79	2739.36	2792.73	2739.07	2512.75	2453.09	2522.39	2522.65	2489.84
Momordol	27178.8	26601.9	25771.6	26942.4	25301.8	22456.3	21906.8	23430.3	23144.5	22630
Adynerin	25394	23938.9	23669	25589.2	23980.2	21377.4	19188.6	20972.3	20876.8	19885.1
Cucurbitacin D	23825.9	21810	21816.9	23297.1	21850.1	20350.5	18186.2	19641.4	19132.7	18496
4-Ethylphenol	113.561	111.044	103.745	115.198	105.341	94.5256	88.223	94.5669	89.0302	94.6722
Erbstatin	312.39	254.188	247.365	275.54	268.945	201.522	173.293	188.295	181.464	170.681
5-Hydroxyconiferaldehyde	303.358	289.563	264.431	295.783	283.961	206.78	185.417	212.139	197.709	183.4
Methyl 5-hydroxyoxindole-3-acetate	415.971	357.777	322.253	374.487	353.075	246.526	225.77	243.667	243.194	233.448
1-[3,4-Dihydroxy-5-(hydroxymethyl)oxolan-2-yl]-4-hydroxyhydropyridin-2-one	1094.4	1036.65	909.479	1022.18	989.468	685.068	678.448	713.734	693.612	690.915
dimethadione	240.379	217.937	188.831	217.298	207.28	128.88	120.655	123.194	128.19	123.375
Dehydroepiandrosterone sulfate	1107.5	1040.9	1033.2	1071.74	1032.84	983.292	939.791	945.044	949.17	958.786
PE(18:0/PGF1alpha)	131.384	117.895	118.075	129.937	109.43	71.097	67.8559	67.9212	62.9507	80.4831
(R)-(Homo)3-citrate	279.108	283.12	273.021	262.648	253.756	237.128	218.797	211.062	227.053	227.471
4,5-Dihydro-drospirenone-3-sulfate	10128.2	10094.7	9698.24	9338.63	8592.72	7731.53	7572.39	7660.33	7753.01	7440.96
nortestosterone laurate	87407	86017.8	85322.9	85256.4	80654.5	76980.2	75479.9	75193.4	76409.4	76126.9
LysoPE(P-18:1(9Z)/0:0)	155444	152068	153343	147048	143805	138616	133822	133676	135521	134350
Dibutyl malate	806.146	760.096	765.737	740.942	744.758	629.27	619.698	640.366	632.528	610.857
Sinapyl alcohol	871.757	841.94	830.861	802.706	812.741	728.955	707.347	733.191	725.317	716.674
Formylfusarochromanone	1747	1663.82	1625.43	1511.82	1507.25	1209.05	1175.17	1223.72	1165.8	1148.4
Zaragozic acid A	12305.5	11945.9	11704.4	11676.1	11372.7	9607.15	9245.6	9405.09	9705.32	9535.45
Imidazolone A	446.254	405.846	349.517	356.893	347.669	22.8817	9.93842	18.9806	10.1111	36.0959
Uzarigenin 3-[xylosyl-(1->2)-rhamnoside]	518.2	513.614	503.234	493.177	473.91	359.012	356.369	371.059	366.817	383.841
PA(18:3(6Z,9Z,12Z)/TXB2)	131.013	134.538	124.52	112.798	107.972	48.0739	41.1629	41.3604	49.7768	57.6811
DG(18:4(6Z,9Z,12Z,15Z)/20:5(5Z,8Z,11Z,14Z,17Z)/0:0)	8625.94	8485.98	8229.64	8351.14	8196.99	7411.35	7243.98	7107.95	7162.69	7318.55
Peucedanin	625.924	590.84	589.46	564.802	546.432	381.272	370.367	361.31	366.749	369.855
Pleurotin	14999.2	14629.5	14251.6	13735.6	13727.7	11143.9	10809.5	10737.8	10915.5	10852.1
Octanal	843.665	831.777	774.189	750.703	754.925	483.45	449.446	460.216	458.221	472.8
4-Ethoxyphenol	94.1757	93.4142	82.6292	75.8235	76.9886	46.1307	43.3238	46.6532	50.931	51.2851
3-Hydroxynevirapine	1910.24	1842.55	1803.99	1750.71	1769.17	1540.54	1532.53	1552.4	1533.12	1556.37
CDP-DG(PGF2alpha/20:3(8Z,11Z,14Z))	2920.5	2748.47	2720.42	2492.81	2433.97	1527.28	1617.7	1568.56	1674.23	1655.64
Diosbulbin F	3474.25	3381.61	3214.56	3312.58	3237.22	2864.58	2827.4	2901.5	2898.52	2890.16
Ajmalicine	3509.42	3485.69	3276.28	3327.76	3283.51	2896.84	2854.46	2928.15	2973.39	2928.01
Tranexamic Acid	225.421	214.847	190.133	200.968	191.431	118.403	102.84	126.747	107.49	117.616
2'-N-Acetylparomamine	342.625	320.865	267.236	275.993	288.935	168.725	153.238	168.025	164.019	177.697
Prodigiosin	302.626	269.637	275.79	273.474	253.631	230.007	207.227	212.248	226.654	215.962
N2-Citryl-N6-acetyl-N6-hydroxy-L-lysine	2503.56	2330.58	2342.13	2327.24	2253.63	2096.78	1983.52	2092.41	2106.5	2031.33
2beta,9xi-Dihydroxy-8-oxo-1(10),4,11(13)-germacratrien-12,6alpha-olide	6130.6	5992.5	5990.46	5978.79	5920.72	5607.37	5446.69	5618.45	5698.16	5593.73
CB-25	2056.82	1952.4	1934.84	2033.28	1911.34	1741.45	1668.08	1707.03	1724.09	1708.98
DG(14:1n5/0:0/18:4n3)	10945.4	10695.8	10555	10745.1	10525.2	9722.33	9421.92	9419.77	9641.95	9442.28
Cinitapride	3775.56	3645.64	3582.99	3676.9	3546.01	3293.76	3289.82	3261.65	3397.3	3332.12
(S)-3-Methylthiohexyl hexanoate	4062.49	3822.53	3709.3	4016.1	3488.44	2694.52	2612.01	2650.28	2934.1	2876.8
(6Z,9Z,12Z)-Octadecatrienoic acid	226.497	221.652	219.237	227.692	210.752	150.748	166.87	167.448	168.584	181.962
cis-1,2-Dihydro-3-ethylcatechol	120.579	117.705	118.881	123.455	117.101	93.276	93.8037	90.3127	93.7444	102.645
3-dehydrosphinganine (C20)	10261.2	10092.9	10152.5	10340.6	9993.41	9180.36	9164.13	9157.62	9362.19	9376.62
2-Phytyl-1,4-naphthoquinone	2734.81	2707.15	2776.79	2865.54	2706.09	2174.34	2159.45	2157.02	2278.92	2176.68
PA(20:4(5Z,8Z,11Z,14Z)/PGF2alpha)	1261.8	1254.72	1279.95	1285.04	1230.24	1032.7	1052.52	1053.87	1110.71	1062.07
20-carboxy-LTB4	632.276	618.796	631.686	650.192	612.139	514.474	511.362	509.053	536.278	522.73
PA(18:1(12Z)-2OH(9,10)/14:1(9Z))	18676.2	18432	18718.7	18928.6	18379.5	15979.1	16110.4	16124	16524.7	16258.9
DG(20:4(5Z,8Z,11Z,14Z)/20:0/0:0)	192.352	190.836	200.361	209.289	220.158	89.5451	75.5865	75.6109	74.6751	112.089
Pro Trp Trp Val	517.845	505.072	480.025	495.568	526.433	218.033	227.197	171.668	265.089	334.085
1-Hydroxy-5,5-dimethylpyrrolidin-2-ol	42.3454	39.5599	40.076	43.7437	45.141	24.7174	27.6273	27.6261	28.4121	30.6106
(23R)-1alpha-Hydroxy-25,27-didehydrovitamin D3 26,23-lactone	1440.36	1426.47	1394.86	1472.16	1441.4	1105.43	1196.51	1164.02	1237.57	1186.19
LysoPC(18:3(6Z,9Z,12Z)/0:0)	349.112	295.666	309.967	409.037	342.633	84.9757	120.311	45.7308	125.635	120.141
PC(22:3(10Z,13Z,16Z)/22:6(5Z,8E,10Z,13Z,15E,19Z)-2OH(7S, 17S))	277.959	258.632	269.565	333.78	304.706	153.938	168.466	122.179	156.193	177.71
Cyclolinopeptide B	380.213	403.978	414.269	393.558	418.06	274.565	309.689	273.034	309.23	307.079
Estradiol-17beta	214.206	209.766	225.46	210.022	225.449	147.461	147.651	147.533	160.261	176.451
3,6,9,12,15-octadecapentaenoic acid	113.724	109.773	117.594	110.815	121.566	86.3687	90.8821	88.4493	89.8273	98.0799
Rutin	313.285	284.614	333.223	294.479	302.262	212.244	191.379	193.145	212.812	231.875
L-threo-Sphingosine C-18	42898.1	42822.7	44431.3	42194.5	43388.9	38181.3	36980.7	37248.6	38276.7	38302.6
beta-D-Glucosyloxydestruxin B	171.725	186.202	186.504	164.889	161.311	85.2452	89.3683	103.056	67.8718	111.499
(3b,16a,20R)-3,16,20,22,25-Pentahydroxy-5-cucurbiten-11-one 3-[glucosyl-(1->6)-glucoside]	60.7685	64.9701	69.821	57.2975	54.9543	37.1858	36.8264	34.1329	24.6679	37.3056
Methylnoradrenaline	72.6996	78.3266	75.9768	64.3243	71.3534	42.7461	51.0654	46.9834	45.3766	42.7302
2,3-Dihydroxytoluene	646.831	707.159	701.577	600.828	649.995	413.41	456.399	439.778	414.625	441.228
N-alpha-Acetyl-L-lysine	221.98	221.404	229.761	216.634	209.619	178.324	183.247	187.835	183.251	174.18
all-trans-4-Oxoretinoic acid	20.3211	23.2985	25.6471	19.0685	16.601	4.75902	7.91695	6.81543	5.68612	4.82243
Laurocapram	10.1895	10.351	11.7352	8.27414	7.88461	4.03e-07	1.36727	2.4168	4.03e-07	0.647137
beta-L-Dioxolane-cytidine	136.959	130.855	139.003	129.834	122.549	95.0793	86.612	93.5774	97.7808	88.3077
DG(13:0/20:3(6,8,11)-OH(5)/0:0)	90.6965	78.1564	92.965	70.8727	70.6482	10.849	4.03e-07	7.46364	4.03e-07	4.03e-07
Molindone	582.06	581.284	607.124	584.938	547.912	476.352	467.414	464.403	480.081	482.048
Ganglioside GA2 (d18:1/12:0)	940.762	852.719	954.275	865.03	763.874	547.8	536.906	477.817	539.933	527.306
6-Deoxyfagomine	133.088	132.091	139.476	118.614	121.16	77.5586	83.7675	74.197	77.8136	76.8197
4-(beta-Acetylaminoethyl)imidazole	114.258	113.779	129.717	85.8841	85.1682	4.03e-07	4.03e-07	4.03e-07	4.03e-07	4.03e-07
PGP(20:4(5Z,8Z,11Z,14Z)/20:5(7Z,9Z,11E,13E,17Z)-3OH(5,6,15))	2715.95	2715.74	2772.5	2448.13	2413.83	1719.07	1803.36	1807.82	1888.27	1802.37
3h-Adrenaline	471.093	471.057	520.2	471.121	438.882	325.724	316.899	328.998	342.428	338.251
2-nonenoylglycine	1392.44	1333.54	1497.89	1341.35	1284.78	901.334	911.326	978.799	990.627	987.442
Marasmal	2829.19	2954.3	3084.97	2859.48	2796.63	2160.65	2238.55	2249.93	2345.73	2296.68
Bn-NCC-1	15846.6	16226.8	16947.9	15808.9	15906.5	13352.2	13346.8	13210.6	13370.2	13334.4
Blasticidin S	996.388	959.303	997.861	955.363	946.116	680.189	656.457	663.187	681.535	668.729
Dapdiamide A	282.948	249.626	272.967	257.423	259.876	76.2507	60.0437	61.3422	67.5362	69.6987
(3S)-3-hydroxycyclocitral	261.753	239.978	250.931	240.612	243.06	125.908	124.402	125.569	128.975	130.276
4-Hydroxy-3-methyl-2-(2-propynyl)-2-cyclopentene-1-one	158.011	160.599	157.294	146.943	151.474	45.3	46.1545	46.6326	45.7693	48.0096
Lidocaine	737.285	768.348	728.061	681.422	705.536	35.8424	31.1243	29.3269	22.1783	22.5978
1,4,6-Trihydroxy-5-methoxy-7-prenylxanthone	1190.22	1164.15	1119.92	1099.84	1120.87	274.43	270.5	257.553	255.533	255.003
4-Hydroxystyrene	887.554	865.418	828.693	791.249	804.123	183.766	180.752	189.922	183.834	191.968
Histidylglutamine	602.545	596.607	573.627	551.974	568.319	238.592	244.954	242.129	235.244	244.051
(8S,9R,11S,13S,14S,17S)-13-Methyl-11-[4-[5-(4,4,5,5,5-pentafluoropentylsulfonyl)pentoxy]phenyl]-6,7,8,9,11,12,14,15,16,17-decahydrocyclopenta[a]phenanthrene-3,17-diol	9651.77	9492.59	9566.27	9345.57	9234.66	6150.16	6201.8	6086.6	6117.08	6073.44
Cycloserine	27224.7	27172.6	27034.6	26677.7	26364.5	14549.3	14552.6	14428.6	14257.7	14351.6
Kanokoside D	2774.18	2744.95	2762.89	2723.21	2672.83	1543.79	1562.65	1559.09	1583.21	1518.79
(R)-Pelletierine	1846.29	1805.13	1824.8	1690.42	1699.4	55.0813	50.0412	39.4822	44.3555	32.063
(3R,5R)-7-[(1S,2R,3R,8S,8Ar)-3-hydroxy-2-methyl-8-(2-methylbutanoyloxy)-1,2,3,7,8,8a-hexahydronaphthalen-1-yl]-3,5-dihydroxyheptanoic acid	4260.27	4207.5	4284.97	4106.71	4045.52	1132.31	1145.55	1155.92	1172.87	1142.68
Dihydrotestosterone diglucuronide	5984.53	5932.73	5976.87	5834.12	5746.6	1643.65	1617.77	1634.23	1682.22	1653.76
Atosiban	4125.76	4141.93	4146.53	3932.44	3940.95	544.165	570.198	564.79	575.919	579.137
Elaterinide	5760.8	5792.04	5838.25	5621.93	5574.72	1196.65	1142.98	1189.63	1194.46	1180.32
2-Methoxy-3-methylpyrazine	117.367	117.369	119.672	107.736	109.477	3.13248	7.37641	5.48158	1.50419	2.0071
Biopterin	703.666	684.427	707.795	619.655	633.441	134.772	144.247	136.831	137.361	141.175
Dihydrostreptomycin	1127.03	1123.83	1136.23	1033.51	1056.65	287.253	301.482	309.222	301.67	310.916
Procaine	214.624	220.9	211.211	189.472	191.692	1.77955	2.2165	1.94864	0.356916	0.909757
N-Ribosylhistidine	591.48	587.028	583.04	527.385	558.597	150.374	152.756	162.253	159.207	154.84
Petasitenine	1261.28	1260.55	1286.36	1248.47	1252.02	614.511	611.371	652.926	625.152	598.291
Cyclokievitone	3072.77	2949.32	3004.35	2944.71	2913.68	1020.81	917.43	1031.15	968.659	951.375
Citrulline	859.118	829.129	850.225	835.387	834.996	374.931	349.667	362.425	349.51	346.927
TWS119	164.95	159.251	172.138	156.409	159.22	56.611	53.1355	52.8686	49.8079	52.442
Ornithine	1387.19	1340.19	1412.94	1321.5	1353.35	530.953	498.262	507.21	487.22	506.064
Evobioside	2858.11	2842.34	3040.92	2751.85	2892.81	209.408	223.489	231.925	199.135	181.394
Vomifoliol 9-[glucosyl-(1->4)-xylosyl-(1->6)-glucoside]	2721.37	2729.09	2739.03	2615.61	2658.84	1575.79	1556.69	1548.36	1611.33	1595.22
Glutaminylalanine	1319.83	1286.61	1296.52	1268.56	1286.87	873.254	867.107	865.376	898.735	891.484
PGP(16:0/PGD1)	202.697	202.41	198.955	185.11	199.952	26.895	18.0767	15.4787	9.07334	23.1796
Tilisolol	7989.41	8027.26	7947.94	7945.92	7867.1	6047.87	5905.06	5914.02	5953.45	5955.99
L-Lactic acid	77.9482	80.0208	77.6592	76.347	75.8158	34.1828	31.0437	33.2141	33.9393	32.8328
Eicosapentaenoylcholine	1536.59	1525.25	1512.48	1503.37	1490.03	832.309	826.052	804.029	806.811	850.237
VINYLSULFONIC ACID	402.143	399.555	399.101	398.524	392.981	199.925	195.8	195.108	202.015	212.413
Glutaminyllysine	572.598	566.635	574.313	552.439	570.515	130.445	118.442	121.43	129.604	84.1366
3-(4-Hydroxy-3-methoxyphenyl)-1,2-propanediol 2-O-(galloyl-glucoside)	775.679	759.646	770.73	736.845	805.692	212.285	218.414	207.434	211.504	177.016
Lactulose	2742.74	2691.58	2713.36	2641.71	2755.14	1652.93	1740.07	1620.88	1627.52	1590.5
ROSAMICIN	2790.62	2797.19	2789.75	2760.82	2855.83	1453.98	1468.32	1364.01	1325.63	1385.41
Corchorusoside A	458.822	451.493	465.356	452.126	471.48	95.1763	104.428	84.8257	70.904	85.2042
Guanine	2281.08	2228.38	2249.5	2190.81	2198.5	1022.23	1048.59	1036.62	1030.98	1039.56
Hexa-1,3,5-trienylbenzene	1224.89	1187.8	1213.48	1168.08	1178.9	626.339	635.538	634.498	622.177	615.037
MG(0:0/14:0/0:0)	1652.8	1614.87	1625.97	1593.85	1608.61	911.431	901.784	892.511	876.14	908.73
Sterebin D	2219.08	2185.62	2220.18	2125.83	2197.93	1003.51	1031.63	1042.16	968.6	1003.65
Paramethasone	3066.33	3028.07	3003.62	3005.57	3039.93	1889.31	1926.05	1891.67	1922.28	1916.7
5-Methoxy-DL-tryptophan	1410.82	1372.5	1347.56	1354.28	1381.29	280.643	285.499	304.134	294.631	264.715
xi-2,3-Dihydro-3-methylfuran	1113.69	1102.14	1092.34	1061.32	1089.18	469.793	495.486	492.698	493.865	490.139
PIP(22:4(7Z,10Z,13Z,16Z)/PGF1alpha)	470.362	461.72	440.628	424.164	454.806	4.03e-07	4.03e-07	4.03e-07	4.03e-07	4.03e-07
2-(3,4-dimethoxyphenyl)ethanamine	570.658	521.475	562.076	549.062	572.756	86.6545	93.4589	89.1794	93.0131	81.2782
Benzene oxide	107.473	101.224	105.768	101.52	107.115	45.4205	48.9275	46.0639	49.7897	46.8124
4-Hydroxyproline galactoside	211.284	198.32	205.744	193.176	197.753	74.0351	79.9647	71.6724	76.5809	73.7473
(E,E)-Lansamide I	717.633	682.914	711.182	676.587	692.306	161.356	197.884	178.903	171.797	152.182
3-Phenoxypropionic acid	2918.75	2879.98	2916.94	2811.98	2893.86	1706.17	1789.05	1699.31	1728.28	1711.43
D-Tagaturonate	1189.38	1166.36	1198.26	1152.6	1190.4	779.687	704.453	725.615	733.21	725.57
Tolcapone	4245.57	4182.77	4223.84	4206.96	4241.37	2342.82	2189	2270.23	2265.72	2254.98
2-Hydroxy-L-methionine	2197.19	2197.43	2251.84	2184.93	2226.06	1296.58	1195.02	1211.9	1210.35	1222.59
LysoPE(P-18:0/0:0)	109096	106552	107039	107800	109659	79064.6	76998.5	73885.5	77321.3	78768
Uridine	8924.09	8822.64	8912.28	8772.14	8917.11	7247.81	7266.65	7085.92	7317.73	7261.68
PC(P-15:0/0:0)	48876.9	48424.1	50042.1	47784.8	48484.1	35520.9	34274.7	34450	34879.3	35754.9
Drospirenone	4706.83	4714.66	4802.35	4670.6	4611.03	3210.66	3196.52	3151.21	3197.81	3263.02
L-Tyrosine	1314.58	1307.43	1369.98	1300.98	1280.76	747.266	726.26	723.103	760.898	765.104
SM(d18:0/PGD1)	10029.8	9876.23	10016.1	10090.4	9956.18	3647.79	3731.99	3791.67	3322.05	3829.05
7α-Hydroxy-3-oxochola-1,4-dien-24-oic Acid	958.804	950.839	927.431	939.085	933.443	530.328	516.253	530.361	523.506	546.702
PE(14:0/0:0)	19856.1	19409.8	19652	19479.3	19587	12802.3	12566.8	12442.6	12440.7	13178.1
Ggstop	51001.3	49127.8	50373.6	49235.7	50214.3	24037.4	25290.2	24792.4	25673.1	25270.2
(1alpha,2alpha,4betaH,6alpha,8R)-p-Menthane-2,6,8,9-tetrol	288.211	283.493	282.636	284.627	286.085	127.092	124.4	125.075	131.309	125.501
(R)-(6-Methoxy-4-quinolyl)-(5-vinylquinuclidin-2-yl)methanol	5914.08	5808.04	5744.41	5670.65	5802.85	1426.1	1460.69	1449.78	1449.05	1420.45
PC(P-16:0/PGF1alpha)	1304.24	1281.24	1262	1256.67	1256.97	364.065	415.222	425.201	396.023	393.179
17-Dimethylaminogeldanamycin	2158.56	2171	2143.14	2137.08	2136.42	799.515	823.343	802.13	879.519	809.692
1-(2-Furanyl)-1-butanone	318.182	321.695	306.534	313.422	312.05	20.7341	20.8515	20.7066	28.0924	23.9741
Cascarillin	2540.35	2513.73	2467.1	2475.3	2493.28	990.281	1007.03	962.537	1044.12	1023.1
Thr Arg Tyr Trp	1785.04	1741.81	1701.99	1690.84	1707.66	387.983	394.638	391.525	428.82	397.333
Ganolucidic acid B	2975.59	2941.36	2884.13	2962	2945.08	1467.25	1540.71	1512.25	1554.85	1562.99
7-Methylguanine	993.457	992.732	978.012	980.246	1001.01	315.383	324.275	333.382	357.764	348.516
Phthalimide	290.457	289.139	285.438	289.912	293.723	50.3061	50.9189	58.746	56.1414	72.9043
Hepoxilin A3	1077.9	1078.99	1076.28	1065.48	1078.25	512.023	517.984	542.769	556.296	559.753
Tropinone	1892.76	1848.67	1856.63	1854.85	1852.42	1040.09	1083.31	1070.63	1094.36	1075.84
1-Deoxy-1-morpholino-D-fructose	5182.55	5034.91	5200.83	5126.5	5163.73	1796.4	1870.23	1813.17	1850.53	1857.61
Pantothenic acid	4054.96	4032.23	4054.34	4000.3	4081.17	1932.06	2009.6	1961.39	2013.73	1991.12
LysoPG(16:0/0:0)	970.125	983.954	958.762	959.178	951.009	430.902	468.442	441.444	452.139	450.24
Thesinine	4756.74	4772.13	4730.59	4702.5	4708.5	2829.91	2946.74	2930.8	2964.95	2945.85
(S)-2-Phenyloxirane	99.4558	97.6564	95.5181	97.5806	101.496	35.8364	37.7953	36.8487	36.0676	37.2221
Androstenediol 3-sulfate	283.716	274.394	271.247	276.193	301.372	11.7838	16.6818	16.7311	21.7205	20.311
3.alpha.-Mannobiose	989.914	983.416	982.508	978.417	1024.54	423.981	456.588	441.909	448.236	433.136
4-(2-Nitroethyl)phenyl primeveroside	1696.48	1683.04	1712.12	1664.1	1769.04	625.511	658.243	632.275	649.081	627.579
p-Anisic acid	355.743	359.989	358.287	360.269	373.583	144.774	141.291	144.686	146.056	153.143
3-Undec-1-enylbenzene-1,2,4,5-tetrol	4255.8	4223	4425.15	4348.86	4552	281.784	296.938	268.905	310.031	294.424
Cynaratriol	3971.03	4038.67	4022.96	4026.8	4128.78	1204.45	1240.65	1247.84	1240.44	1239.88
Cyclo(D-Trp-D-Asp-Pro-D-Ile-Leu)	3752.55	3689.24	3711.17	3751.15	3809.54	928.969	994.419	1002.15	939.105	991.602
DG(12:0/20:5(7Z,9Z,11E,13E,17Z)-3OH(5,6,15)/0:0)	46680.3	46583.1	46917.6	48554.6	47473.2	26616.3	25359.7	24943.7	26130.2	25691.9
Lysylthreonine	16354.7	16416.5	16394.4	16724.7	16494.8	12803.3	12717.6	12630.2	12824.6	12779.5
Goshonoside F3	10441.3	10605.9	10905.5	11005.2	10956.3	4347.31	4323.77	4289.16	4443.05	4407.82
L-Malic acid	7313.77	7494.83	7735.48	7818.43	7824.89	2975	2959.19	2974.13	3029.02	3030.68
Indole-3-carboxaldehyde	26898.7	26798	26799.7	28180.3	28059	9272.38	9280.75	9316.43	9573.66	9502.78
ferulic acid	2205.13	2179.74	2211.49	2268.94	2284.81	845.088	847.592	840.471	878.558	888.643
6-Oxopiperidine-2-carboxylic acid	9878.18	9819.63	9975.85	10119.2	10147.4	6146.86	6123.09	6008.73	6140.35	6080.4
Val-Tyr-Leu-Arg	10563.8	10419.4	10685.9	10953.5	10749.9	4473.99	4375.82	4236.58	4353.34	4251.26
Pyrazine diazohydroxide	1241.96	1217.73	1248.76	1307.75	1289.69	129.589	110.153	120.847	113.706	107.529
Triphasiol	27354.4	28122	28218.9	28263.4	28349.2	10431.2	10684.3	10408.1	10776.4	10684.6
Meproscillarin	11451.7	11578	11776.9	11660.8	11734	1686.2	1667.34	1693.54	1708.99	1715.82
Arginyllysine	18161.8	18186.4	18613.6	19121.6	19024.4	3701.42	3471.58	3387	3590.28	3570.48
3-(2-Hydroxyphenyl)propionic acid	20914.3	20707.7	21136.8	21469.7	21534.5	6932.24	6741.9	6959.07	6866.53	6850.83
Deoxyinosine	14016.8	13769.8	14014.8	14525.8	14101.2	1201.12	1199.2	1186.78	1239.26	1223.45
Cholic acid glucuronide	14144.2	14034.9	14205.2	14522.5	14400.2	5833.71	5939.04	5829.42	6019.86	6036.72
2-Hydroxy-7-methoxy-5-methyl-1-naphthoate	1753.68	1684.41	1715.75	1751.8	1748.86	128.878	133.364	133.168	138.592	142.205
Pyridone 6	22326.3	22100	21857.1	22652.7	22384.5	4871.86	4730.27	4802.73	4962.46	4865.36
Cerasinone	49936.8	49286.7	49666.5	50311.6	50013.1	1065.67	1057.62	1005.59	1130.48	1057.46
Sorbitan laurate	23683.7	23536.4	23648.7	24015.1	23877	9093.45	9172.85	9175.49	9386.29	9303.03
Laninamivir	4702.7	4631.57	4664.12	4615.68	4666.23	1172.24	1152.69	1184.08	1233.42	1200.76
(2R)-2-Hydroxy-2-methylbutanenitrile	7976.97	7895.95	7898.34	7810.78	8040.58	387.627	409.38	407.087	434.11	423.762
Forskolin	8581.04	8557.44	8718.76	8609.96	8592.72	3295.24	3302.93	3229.92	3306.24	3363.73
5-Hydroxyindole-3-acetic acid	4063.64	4094.71	4100.56	4043.72	4073.8	1268.14	1299.82	1267.12	1317.06	1301.29
Delta7-Avenasterol	717.186	736.239	745.405	737.969	756.551	127.34	110.248	115.085	113.675	103.076
N-Docosahexaenoyl Proline	2478.08	2538.01	2550.7	2600.26	2557.93	442.68	443.052	456.262	478.825	462.415
2-Methoxyestrone 3-glucuronide	7902.97	8002.1	8281.96	8205.07	8239.3	2387.82	2318.83	2375.29	2413.5	2389.3
hydroxyethyl methacrylic acid	2028.58	2013.71	2126.02	2146.28	2114.31	186.973	178.393	182.604	190.728	191.791
2,4,12-Octadecatrienoic acid piperidide	1229.44	1233.85	1277.35	1281.42	1292.91	120.754	117.199	108.763	122.771	123.487
(3R)-3,4-Dihydroxy-3-(hydroxymethyl)butanenitrile 4-glucoside	11710.6	11595.2	11857.5	11762.4	11787.9	5142.48	5048.78	5022.89	5077.63	4978.39
4-Hydroxybenzaldehyde	1403.87	1399.64	1468.76	1453.92	1421.03	301.308	290.827	289.167	300.706	299.368
2-(1-Hexyloxyethyl)-2-devinyl pyropheophorbide-a	5999.96	6000.27	6188.84	6088.81	6077.87	2825.8	2781.84	2826.92	2862.27	2837.73
Notoginsenoside T1	12548.6	12941.1	12784.3	12730.4	12488.8	7440.1	6972.3	6870.12	7454.62	7156.88
Ouabain	1409.62	1408.99	1473.78	1410.66	1409.75	419.538	444.468	438.756	458.174	404.756
Digoxigenin bisdigitoxoside	5141.72	5071.61	5365.75	5175.34	5185.54	844.804	903.964	835.719	917.718	945.412
Corchorusoside B	17261.3	17165	18235.5	17517.9	17970.5	1999.93	1967.08	1943.07	2011.09	2015.31
5-Azanonane deriv.	11644.9	11604.3	11983.7	11572.5	11587.4	4354.47	4244.5	4149.76	4190.3	4182.05
Deoxycholylisoleucine	14709.3	14734.7	15177.2	14823.6	14757.1	5151.74	4937.15	5003.71	4993.83	5132.26
4'-Hydroxy-5,7-dimethoxyflavan	4582.66	4611.65	4890.12	4738.92	4639.42	2326.89	2301.36	2317.14	2406.48	2330.83
2-Amino-6-methyl-2,3,6,7-tetrahydro-1H-pteridin-4-one	1366.49	1373.5	1429.31	1356.3	1350.94	563.913	559.465	568.503	614.795	588.935
Aplysiatoxin, 17-debromo-	99487.5	98972.3	102253	100495	97699.4	53119.8	53101.2	53569.5	55440.8	54458.1
(2E,6E)-Piperamide-C7:2	23162.9	22877.1	23752.3	23113.3	22701.5	11162.4	11331.1	11447.1	11857.9	11753.7
2H-1-Benzopyran-7-ol, 3-(4-methoxyphenyl)-4-((4-(2-(1-piperidinyl)ethoxy)phenyl)methyl)-	14544.4	14615.7	14701.4	14667.8	14580.5	11872.7	11877.4	11789	12138.3	12057.5
L-Valine, N-(2-hydroxy-3-butenyl)-	1118.38	1091.95	1100.89	1100.41	1092.04	706.687	696.974	709.733	729.573	720.309
Glutamylarginine	6565.96	6509.72	6532.78	6553.77	6464.92	5053.4	5053.65	5061.3	5208.17	5100.71
NNAL-N-glucuronide	139638	138401	139691	139971	138258	94633.4	94596.3	94622.8	98196.6	96584.9
Tazemetostat	60312.2	59866	60339.9	60424.6	59366.8	45968.2	45485.7	45586.7	46823.1	46314.7
DG(18:3(6Z,9Z,12Z)/20:4(8Z,11Z,14Z,17Z)/0:0)	1824.77	1797.57	1795.7	1872.22	1772.79	698.937	654.921	693.539	743.752	730.449
21beta-Hydroxyhederagenin	6755.8	6765	6703.69	6830	6768.88	4852.08	4841.4	4934.71	5023.66	4931.58
Ajugol	14174.7	13770.6	13893.6	13949.3	13636.4	8401.25	8014.79	8300.92	8376.54	8317.08
1,11-Undecanedicarboxylic acid	2292.91	2271.36	2311.45	2302.39	2255.34	1715.57	1659.26	1686.2	1708.41	1700.6
Fusidic Acid	83049.5	81719.2	80662	81500.6	80203.3	49105.7	47570.2	47448.3	50348.8	49537
[6]-Gingerdiol 3,5-diacetate	3834.8	3745.26	3725.32	3822.28	3770.47	1724.16	1666.02	1686.64	1758.39	1739.69
9,10-Epoxyoctadecanoic acid	3982.5	3895.78	3908.05	3932.61	3904.86	2001.34	1979.08	2027.7	2100.85	2070.15
PD-160725 2-hydroxyethanesulfonate	2039.58	2000.4	1970.96	2028.81	1980.03	1083.77	1049.63	1104.34	1111.38	1088.11
Tuftsin	6648.47	6513.33	6493.31	6600.04	6495.09	3478.91	3413.83	3455.62	3561.66	3463.85
Methyl 8-[3-(2-hydroxyoctyl)oxiran-2-yl]octanoate	8836.05	8590.98	8482.12	8715.48	8554.18	3593.84	3473.08	3576.25	3606.77	3551
Lysyl-Proline	3437.49	3391.57	3405.21	3395.49	3324.17	1585.33	1615.38	1677.31	1668.57	1746.45
8-Hydroxycarteolol	3382.76	3363.86	3418.26	3352.35	3335.66	2077.23	2019.08	2027.57	2109.48	2075.94
Rifaximin	1210.7	1235.45	1236.44	1190.92	1209.15	319.897	317.169	333.316	337.38	359.67
[(S)-1-Carboxy-2-phenyl-ethyl]-carbamoyl-Arg-Val-Arg-aldehyde	6443.37	6397.6	6477.07	6280.9	6384.66	2845.38	2848.98	2846.43	2965.3	2900.91
1-O-Hexadecyl-sn-glycero-3-phosphocholine	4368.9	4390.29	4487.16	4432.87	4188.03	1537.84	1485.81	1460.01	1565.76	1541.64
Homocastasterone	6920.97	6915.69	7103.37	7028.35	6751.49	3420.89	3343.18	3339.93	3379.98	3557.26
Avermectin B1a aglycone	14506.8	14500.7	14570.2	14585.2	14351.4	9095.16	8985.12	8944.53	9286.02	9083.54
Pro Arg Lys Thr	8838.4	8758.86	8933.6	8875.56	8650.28	3788.41	3754.4	3773.72	4003.39	4091.79
Dihydroergocornine	17207	17059.5	17641.4	17329.7	16552.9	4362.29	4573.63	4649.64	5110.12	4835.83
Phe Lys Gly Asp	1123.14	1110.04	1141.11	1119.05	1060.97	164.869	161.616	168.132	199.963	192.503
(R)-6'-O-(4-Geranyloxy-2-hydroxycinnamoyl)-marmin	4602.85	4477.79	4636.92	4623.2	4588.17	2311.81	2302.81	2316.27	2392.1	2379.48
3-O-Protocatechuoylceanothic acid	8629.5	8517.82	8646.71	8916.2	8578.38	3847.98	3788.98	3837.43	3951.68	3942.18
Deoxycholic acid 3-glucuronide	7213.41	6951.82	7035.27	7291.49	7012.8	1365.74	1366.48	1402.34	1426.91	1432.68
Benzyl gentiobioside	8859.91	8738.24	8805.56	8941.7	8888.88	2290.96	2284.42	2361.63	2381.43	2347.48
Talaromycin A	2154.86	2122.42	2148.58	2136.85	2097.87	1438.1	1424.38	1432.05	1430.75	1441.76
2-(2-Methylpropyl)pyridine	151.977	143.319	149.915	145.072	145.657	4.15821	2.71403	4.31833	2.15303	4.87061
Capsianoside IV	83475.4	82640.9	84965.5	82715.3	82667.8	27964.2	27505.6	27630.1	28422.9	28246
1-ACETYLPIPERIDINE	1835.84	1816.01	1843.15	1789.72	1791.87	249.014	256.559	250.479	251.545	255.891
3-Deoxyguanosine	2195.75	2170.87	2199.32	2163.73	2081.7	339.693	332.624	331.719	355.358	342.932
Urobilin	9628.08	9543.56	9770.69	9414	9257.71	860.458	908.177	881.264	897.927	918.783
Scopolamine	1972.25	1972.82	1998.24	1999.5	1941.79	761.183	785.32	765.453	792.791	760.57
9(R)-HODE	2209.38	2206.26	2184.92	2203.28	2150.06	761.668	782.568	758.023	775.791	755.592
13(S)-HpODE	31618.3	30938.5	30859.2	31123.5	30538.8	9041.7	8975.3	9184.07	9128.57	9031.42
n-methylsphingosine	1369.16	1328.68	1317.97	1334.6	1316.18	287.657	277.285	286.452	290.346	277.963
Cyclopentenyl cytosine	3724.33	3619.48	3634.83	3621.16	3542.31	683.247	680.425	683.404	688.031	710.838
Palmitoleoylethanolamde	9665.44	9368.99	9229.96	9457.17	9104.7	1581	1567.48	1591.62	1651.09	1614.07
28-Norbrassinolide	1791.13	1745.43	1755.5	1745.22	1734.67	356.221	382.294	389.096	404.931	407.904
8beta-Angeloyloxy-15-hydroxy-1alpha,10R-dimethoxy-3-oxo-11(13)-germacren-12,6alpha-olide	27261.1	27245.7	27174.7	27308	26885.6	9960.07	9860.59	9921.99	10359	10326.3
Rotundifoline	5303.43	5210.26	5246.26	5246.6	5128.17	2545.49	2540.31	2535.29	2640.79	2615.37
2-Naphthylaminomethyl-gamma-aminobutyric acid	403.223	410.18	406.351	382.199	384.695	132.109	162.917	142.462	161.692	148.099
Oxypurinol	335.575	350.846	324.423	311.588	320.962	101.016	108.949	100.713	108.082	98.2109
2,3-Dinor-TXB2	2144.31	2139	2117.36	2075.5	2064.83	1571.12	1581.27	1587.99	1614.93	1578.96
Steviobioside	1404.32	1410.71	1397.81	1374.27	1322.74	783.738	820.363	803.508	830.151	780.974
MG(0:0/20:4(8Z,11Z,14Z,17Z)/0:0)	20172.3	19793	19612.2	19520.2	19040.6	12983.7	13103.8	12895.8	13204.7	13431
Alcaftadine	4124.08	4145.14	4034.98	3908.8	3926.3	2100.4	1988.07	2004.53	2173.68	2147.14
Sialorphin	16555.4	16528.8	16737	16150.1	15921.9	10300.7	10648.6	10654.4	10956.1	10681.4
11b,13-Dihydrolactucin	2983.48	2970.69	3062.08	2852.95	2800.12	1027.04	1040.97	1035.15	1101.88	1023.5
Salutaridinol	2091.99	2059.06	2125.81	1976.07	1917.64	623.682	644.579	624.597	648.338	656.736
6-Methylquinoline	26381.6	26079.1	26241.5	25495.7	25400.3	20092	20106.9	19798.6	20404.1	20240
Alnustone	1566.05	1552.38	1525.65	1483.63	1468.66	916.773	951.091	911.995	976.786	927.078
Dihydroceramide	364.451	371.105	357.087	368.381	352.452	192.649	186.365	208.349	205.69	189.908
Strictosidine aglycone	3700.61	3712.68	3632.04	3688.92	3641.15	2469.95	2436.97	2500.76	2602.73	2587.99
2-Deoxybrassinolide	4535.44	4552.98	4458.61	4503.91	4433.07	2958.22	2954.75	3047.5	3089.9	3088.71
12-trans-Hydroxy juvenile hormone III	1687.61	1614.15	1536.46	1538.89	1561.01	593.592	614.712	664.771	653.017	657.78
trans-4-Aminocyclohexanecarboxylic acid	101.924	97.085	95.0984	93.2648	94.1397	38.3644	40.9873	39.4481	40.2176	43.3543
β-PHENYL-gamma-Aminobutyric Acid	21290.9	20676.7	20319.4	20334.8	20392.1	13227.2	13599.3	13652.7	13984.2	13884.9
L-Urobilin	169925	166820	161645	163074	163088	97898.4	97833.2	98150.7	101549	102146
4-hydroxy-2-nonenal-[Cys-Gly] conjugate	1605.44	1554.47	1507.98	1556.93	1459.97	553.806	599.181	633.264	583.611	616.927
3-Epinobilin	3782.48	3668.13	3654.05	3669.72	3641.03	2896.33	2877.94	2933.19	2948.55	2961.79
Elatoside G	25289.7	24616.7	23724	24656.7	23884.6	14154.4	14334.1	14297.1	14588.4	14792
3-Oxooctadecanoic acid	571.223	544.046	509.545	544.565	519.999	185.948	199.666	206.051	210.366	222.5
(±)9-HODE	20059.8	19827.3	19661.2	20076.8	19657.3	15050.5	14932.9	15159.3	15345	15196.3
Urobilinogen	12245.3	12093.7	11663.5	12156	11489.2	3627.49	3847.43	3873.24	4121.9	4077.27
(5E,8E,11E)-Hexadeca-5,8,11-trienoylcarnitine	9197.45	9203.25	8948.11	9329.88	8821.22	4673.67	4776.75	4656.96	4647.42	4759.21
Idebenone	1912.23	1892.26	1872.51	1943.21	1851.4	1227.25	1240.36	1251.48	1257.8	1274.75
beta-Tocotrienol	47942.2	47672.8	46628.7	48445	46960.5	32963.3	32782.8	32665.5	33385.7	33393.2
1-Nitroso-2-naphthol	202.184	193.845	194.614	196.884	187.827	62.8241	67.1207	63.5825	69.4771	74.542
3,5,7-Trimethylepicatechin	664.415	620.878	613.822	629.803	599.819	39.9157	59.5139	48.42	67.443	55.5045
6-beta-hydrocortisol	1629.14	1609.96	1578.73	1615.19	1580.68	808.004	847.356	823.506	842.559	844.828
Met Val Trp Arg	15711.3	15274.5	14464.4	15166.1	14617.9	2392.62	2566.77	2618.78	2646.96	2896.42
3-(L-Menthoxy)-2-methylpropane-1,2-diol	746.804	735.227	724.825	749.159	734.636	419.65	437.908	415.654	432.865	434.411
Popop	484.29	456.23	461.901	470.072	466.168	158.013	173.604	160.682	159.883	173.686
Xanthosine	1338.38	1236.06	1258.64	1224.98	1197.55	394.306	416.177	435.83	440.172	421.343
Phenylethanolaminium	16399.5	15964.3	15709.8	15563.5	15433.1	8451.79	9050.41	8922.81	9190.81	9021.61
L-gamma-Glutamyl-(3R)-L-beta-ethynylserine	1806.14	1738.79	1777.92	1723.41	1643.04	509.862	511.76	574.035	579.779	575.439
4-Hydroxy-4-(3-pyridyl)-butanoic acid	2093.63	2084.12	2083.46	2022.74	2045.3	1090.66	1140.42	1161.81	1185.19	1155.89
Ponasterone A	1070.66	1068.23	1057.25	1026.69	1040.87	540.734	541.109	556.722	576.954	565.718
LysoPC(22:2(13Z,16Z)/0:0)	3780.42	3736.41	3778.57	3653.58	3666.3	1404.19	1459.31	1487.64	1506.93	1544.51
Rphdhd	1704.95	1701.91	1708.37	1632.58	1636.21	647.595	664.661	689.304	671.758	702.177
Isoquinoline N-oxide	31025.2	30594.9	30403.2	29657.8	29812.8	14863.3	15237.1	15216.7	15593.4	15469.4
Fulvestrant	3339.02	3327.07	3310.57	3191.45	3165.51	1026.06	1066.31	1066.8	1101	1071.38
4-Alanylaminoantipyrine	4932.17	4857.68	4771.75	4792.71	4738.82	3364.49	3350.38	3368.65	3453.39	3508.23
Aminoglutethimide	818.002	787.579	749.291	773.179	735.997	269.282	279.963	262.266	281.833	280.265
Argipressin (4-9)	1569.76	1542.79	1480.61	1517.45	1481.94	778.367	775.003	772.954	805.495	795.471
Calanolide A	3201.38	3147.59	3077.51	3122.46	3079.67	2222.68	2222.57	2195.6	2270.54	2246.22
16-phenyl tetranor PGF2α	942.394	901.234	894.711	883.607	846.202	409.677	405.362	405.352	397.661	414.595
3-Hydroxyocta-3,6-dienoylcarnitine	856.934	793.289	805.645	800.029	773.065	278.008	274.345	267.886	278.105	276.058
9,10-DiHOME	19941.9	19410.5	19245.2	19423.4	18883.6	11988.9	11894.1	12175.3	12137.1	12079.5
6-Aminohexanoate	116.462	114.471	111.105	109.807	108.646	53.7557	53.6842	56.9735	56.1929	56.3017
Moveltipril	9306.58	9149.91	8898.83	8942.43	8867.76	5941.38	5979.1	6036.59	6046.32	6028.64
INDOLE-3-CARBINOL	10097.2	9806.42	9381.56	9318.76	9376.86	3156.2	3185.67	3220.33	3262.46	3248.51
Triterpenoid	2779.29	2728.22	2616.66	2648.82	2579.9	608.234	603.444	665.048	653.678	694.704
5'-N-Methylcarboxamidoadenosine	1143.75	1131.46	1105.67	1101.21	1054.2	395.875	377.343	422.623	420.665	421.276
N-Palmitoyl Proline	1230.28	1221.41	1199.03	1207.46	1158.45	345.852	335.06	376.999	350.117	347.036
Hydroxygaleon	305.226	279.851	269.943	279.989	264.677	53.8585	63.8189	60.4398	51.0892	41.2465
Lysyl-Gamma-glutamate	2831.02	2710.71	2469.43	2672.37	2429.2	269.664	163.981	221.791	58.2807	83.114
2,5-Dimethoxy-4-propylthiophenethylamine	186.096	181.954	167.119	171.646	162.012	33.4235	40.096	39.4672	27.4192	30.0802
6-beta-hydroxydexamethasone	3332.61	3347.91	3167.62	3351.34	3193.77	1732.54	1725.99	1680.51	1641.54	1588.4
Octanoic acid	1503.61	1506.44	1443.55	1482.91	1447.85	724.023	743.022	731.542	733.349	723.177
Thapsigargin	30796.2	30608.7	28278.8	29996.6	28954.4	3786.43	3728.89	3770.68	3597.91	3426.17
Talinolol	38323	38135.9	37311.9	37440.7	37303.8	18602.7	18730	18001.6	18115.9	18269.3
Acetyl Podocarpic Acid Anhydride	1253.79	1285.25	1218.31	1258.11	1230.47	79.3578	84.5662	70.1474	59.4143	69.8341
N-Stearoyl Proline	3214.7	3133.64	3123.82	3193.35	3109.71	1677.58	1734.83	1666.48	1713.34	1628.48
DG(10:0/18:1(12Z)-2OH(9,10)/0:0)	4355.54	4339.14	4315.26	4374.93	4252.24	2645.88	2665.93	2633.15	2653	2609.14
I-Urobilinogen	39992.4	37361.4	34553.7	38458.3	35829.4	7557.01	6915.44	7251.32	7867.07	7485.06
Ubiquinone-4	128857	125542	118644	124083	121159	71134.1	72192.6	71478.5	72573.8	72129.9
Avermectin A1a aglycone	1327.05	1286.92	1138.36	1224.46	1166.66	236.204	236.775	242.897	261.546	236.46
[(2S,3S,5R)-3-Azido-5-(5-methyl-2,4-dioxopyrimidin-1-yl)oxolan-2-yl]methyl (2S,3S)-2-amino-3-methylpentanoate	2768.95	2670.98	2644.46	2677.74	2623.77	1852.88	1837.19	1862.35	1927.22	1831.89
PC(LTE4/22:2(13Z,16Z))	1467.87	1435.55	1373.62	1473.3	1365.73	557.585	564.098	608.114	624.335	538.521
Matricin	1839.5	1775.19	1754.51	1805.45	1785.29	1047.42	984.355	1009.12	1007.14	1018.51
Acipimox	1046.07	996.293	979.539	991.068	987.548	495.762	468.609	503.313	487.023	483.155
L-Leucine	1195.06	1138.7	1138.24	1126.86	1134.69	467.804	451.549	461.766	475.018	449.429
Abscisic aldehyde	3638.8	3475.78	3395.85	3446.49	3439.45	1183.44	1081.83	981.013	1140.51	955.347
Pregnan-20-one, 17-(acetyloxy)-3-hydroxy-6-methyl-, (3b,5b,6a)-	86594.5	85303	83995.2	84670.3	83982.5	53034.7	52704.4	53506.5	54514.8	53577.2
(-)-Riboflavin	3717.47	3601.01	3524.87	3576.85	3520.54	1814.11	1774.64	1775.58	1807.72	1834.56
Preisocalamendiol	1235.91	1188.25	1151.41	1180.15	1163.09	537.075	530.029	535.99	555.619	550.274
Stercobilin	27295	26607.4	26405.9	25931.6	26263.8	14313.8	13941.1	14135.5	14679.2	14278.6
Aditoprim	2009.19	1937.3	1890.21	1860.94	1861.84	727.093	743.755	709.887	792.347	747.077
PI-103	14188.5	13722.8	13562.4	14027.9	13722.6	10015.5	9696.74	9806.11	10198.9	10105.3
Dehydrophytosphingosine	574.069	533.796	517.575	565.352	513.896	222.679	210.014	200.82	220.776	229.138
Lucidumol A	187550	183724	183416	185395	179996	137866	133276	134558	142240	136152
(3R,4R,5R)-3-Fluoro-5-(hydroxymethyl)oxolane-2,3,4-triol	108.097	104.986	104.356	109.312	97.0619	34.7086	35.3106	37.555	42.1591	39.7712
MG(22:4(7Z,10Z,13Z,16Z)/0:0/0:0)	11939.1	11565.5	11554.2	11843.1	11421.2	9478.89	9568.03	9325.04	9464.48	9423.81
Phenanthrene-3,4-diol	348.895	300.606	295.753	326.525	275.702	26.4562	25.088	20.2953	24.4509	18.2135
Echinatin	1959.97	1744.9	1680.93	1875.02	1604.91	378.859	394.62	392.566	397.43	352.312
15-keto-17-phenyl trinor PGF2α	975.846	922.832	934.985	946.88	940.628	706.419	708.676	709.332	712.631	702.258
Avermectin A1a	3438.83	3323.86	3421.98	3431.16	3322.94	2577.71	2585.69	2521.45	2580.69	2537.35
1,6-Dihydroxy-5-methylcyclohexa-2,4-dienecarboxylate	159.502	172.314	131.605	147.591	139.334	0.0312671	0.283371	0.3424	0.00425454	0.704235
L-Tyrosine methyl ester	460.634	480.101	421.326	424.693	432.673	221.92	223.076	216.58	220.052	214.796
DIBOA trihexose	4058.43	4075.57	3671.06	3704.64	3816.23	1879.93	1923.33	1926.4	1945.96	1909.65
N-Methylnicotinium	404.996	398.396	337.579	356.869	359.506	124.999	132.269	131.796	134.032	129.597
1-Anilino-9,10-dioxo-2-anthroic acid	36044.6	35248.6	31267.5	32898	33521.9	15561.3	15945.9	15689.9	15497.8	15598.7
7-Methyl-2'-deoxyguanosine-3'-monophosphate	11494.9	11185.1	9954.7	10449.5	10716.8	4949.54	5196.66	5100.86	5214.29	5139.41
2-(5-Methyl-2-furanyl)-3-piperidinol	65.3248	69.5487	62.1346	59.7694	64.408	0.252135	0.838074	0.0773327	0.999541	0.849055
Gln Phe	3435.52	3410.56	3226.52	3227.37	3321.96	1396.13	1424.73	1384.42	1428.71	1343.57
Andre	2243.19	2235.99	2181.03	2154.67	2134.85	1061.02	1018.48	998.575	1012.13	1085.31
N-Myristoyl Arginine	358.298	353.785	342.796	331.745	323.337	11.6522	13.4106	13.0382	11.793	13.42
4-Hydroxy-3-methoxycinnamic acid	1297.45	1290.49	1253.93	1208.52	1225.68	355.405	364.823	348.147	324.795	363.393
Cyclooctyl acetate	326.57	332.762	301.303	310.527	304.194	41.4838	26.1435	15.1545	22.7741	32.8098
Myristic acid	1267.72	1235.57	1167.74	1172.48	1189.4	361.44	364.468	352.741	342.521	348.709
Tylactone	511.48	502.914	477.411	486.484	491.397	268.023	270.762	265.567	267.375	268.274
Pithecelloside	914.329	886.242	798.228	849.233	867.139	226.457	174.661	198.643	177.672	119.746
1-Acetyl-3,27-dihydroxywitha-5,24-dienolide 3-glucoside	2693.35	2624.21	2338.92	2526.15	2504.06	1239.15	1256.29	1285.29	1215.97	1270.17
Methyldopate	482.243	461.25	426.1	448.812	455.122	152.928	155.324	158.77	171.126	159.316
3-Hydroxyomeprazole	11916	11815.3	10678.9	11156.4	11556.2	4811.02	4949.83	4821.77	4845.91	4916.79
8'-hydroxyabscisate	11821.4	11516.6	10770.6	10969.6	11080.8	4475.84	4678.89	4589.33	4585.33	4620.07
6''-O-Carbamoylkanamycin A	3265.93	3218.11	3058.53	3028.66	3064.6	2209.17	2111.54	2179.23	2138.15	2193.28
A,b-Dihydroxyisobutyric acid	427.153	409.881	390.02	368.025	378.103	194.924	183.582	197.608	184.753	185.914
Glutathione episulfonium ion	188.136	162.052	150.746	142.608	160.054	23.8018	24.7481	18.1902	26.1188	28.446
Isovestitol	2595.49	2553.81	2480.51	2462.54	2520.9	1980.99	1943.86	1963.02	1948.72	1975.64
Epothilone A	546.047	534.534	515.437	517.914	537.794	365.233	370.822	370.227	362.027	376.083
4-(Aminomethyl)-1-methylpiperidin-4-ol	150.59	153.498	137.804	140.81	149.745	24.079	25.7011	26.3095	23.3808	27.7346
Arginylproline	3515.71	3523.55	3128.08	3093.48	3078.24	656.901	689.658	679.414	654.589	670
Tranylcypromine glucuronide	2500.86	2432.62	2224.43	2144.72	2205.17	765.698	810.045	803.954	769.391	746.509
2-Oxobutanoate	563.345	538.768	518.373	508.487	522.274	304.191	316.473	316.192	314.731	309.903
N-Phenylmaleimide	568.551	545.441	521.128	502.235	505.536	185.903	181.31	190.751	185.962	194.314
Partricin A	1928.45	1863.18	1778.43	1734.91	1719.71	764.951	801.951	801.35	812.161	747.612
Ondansetron	680.211	674.507	605.317	595.066	636.317	153.091	174.33	164.184	139.587	136.685
Isoquinoline	187.691	186.903	177.347	163.132	174.249	42.9124	54.2615	52.0458	48.6597	47.6934
N-benzyl-1-methyl-1H-pyrazolo[3,4-d]pyrimidin-4-amine	3941.44	3938.24	3845.5	3781.3	3874.13	2983.59	3064.81	3060.86	3030.09	3025.89
3-(1-Hydroxymethyl-1-propenyl)pentanedioic acid	319.227	300.994	305.698	296.109	283.053	146.377	149.629	148.218	135.98	160.376
Farnesoic acid	91.9308	83.4584	86.8868	83.6834	84.3665	32.3775	30.5165	28.2549	25.9459	36.7057
Stercobilinogen	4707.77	4665.05	4598.96	4591.02	4566.85	3450.94	3273.33	3313.53	3290.5	3374.85
10-alpha-methoxy-9,10-dihydrolysergol	1530.3	1498.57	1411.96	1444.82	1426.93	767.454	670.187	786.042	669.566	661.072
Histidylhistidine	629.47	613.949	604.785	602.584	600.763	436.143	406.504	435.138	398.415	423.294
4'-Hydroxycilostazol, trans-	2572.97	2601.38	2689.65	2543.91	2515.09	1361.04	1321.36	1319.7	1385.4	1329.81
VPGPR Enterostatin	1963.87	1887.15	1999.68	1822.9	1774.14	507.799	467.085	488.796	505.576	467.851
Imidazole-4-acetate	806.112	825.297	883.391	803.597	780.768	299.779	293.393	329.297	334.193	310.672
xi-4-Hydroxy-4-methyl-2-cyclohexen-1-one	175.465	179.031	187.337	173.513	167.948	89.1604	90.3036	86.2526	92.5522	89.0872
Partricin	915.776	925.588	958.312	921.264	879.411	554.54	539.128	558.342	584.479	558.502
PC(O-18:0/0:0)	25395.9	25396.9	26078.9	24623.4	24467.8	17397.2	16834.6	16981.9	17478.1	16889.3
neriifolin	1408.64	1396.9	1478.78	1430.28	1373.15	885.81	913.858	847.544	912.482	910.139
11-Meo-fes	15469.1	15455.1	15602.3	15311.9	15082.1	11515.5	11773.5	11678.8	12166.6	11925
PL	4331.63	4352.61	4394.48	4323.64	4313.24	3790.1	3795.16	3779.34	3877.9	3812.56
Inuline	2648.58	2718.8	2735.18	2666.54	2623.41	2252.79	2218.65	2274.26	2298.31	2285.27
3b-Hydroxy-5-cholenoic acid	17663	18060.8	18073.1	17893	17503.7	15524	15178.6	15347.4	15572.1	15397.2
1-[(5-Methoxy-2,3-dihydro-1H-indol-3-yl)methylideneamino]-2-pentylguanidine	1858.5	1898.76	1893.04	1828.78	1831.44	1588.16	1579.56	1569.5	1630.43	1592.59
Isohydroxymatairesinol	1634.74	1733.05	1788.94	1612.13	1634.43	999.298	1009.8	1007.47	1085.1	1051.11
PIP(PGF2alpha/16:1(9Z))	1673.95	1741.68	1868.54	1625.92	1570.59	629.88	641.93	658.502	692.107	694.217
Furcelleran	749.239	774.791	816.17	717.367	706.593	352.121	372.572	342.363	387.087	359.036
δ-CEHC	637.22	658.276	617.488	626.748	599.495	362.243	375.611	361.808	382.14	362.191
Asp Ile Ser Glu	2296.06	2290.73	2267.59	2222.92	2167.17	1657.52	1662.53	1626.42	1704.74	1697.91
Myricanol 5-beta-sophoroside	8411.5	8160.26	8169.34	8007.84	7795.55	5208.75	5163.36	5197.78	5253.57	5200.81
2-Hydroxycampholonic acid	1140.32	1131.02	1133.89	1123.57	1080.74	902.099	883.251	905.893	903.38	880.569
5-Aminoimidazole	503.871	496.34	490.992	464.062	462.129	297.277	298.972	295.457	288.052	272.188
Calendic acid	1643.11	1663.82	1559.44	1524.49	1428.51	724.375	725.173	743.438	708.442	614.91
2-[(2-Amino-2-oxoethyl)-[(2S)-2-[(2-amino-2-oxoethyl)-(carboxymethyl)amino]propyl]amino]acetic acid	2320.57	2323.68	2390.29	2223.16	2192.2	1453.77	1503.69	1533.24	1610.15	1547.02
Isolinderanolide	48.2063	46.6366	51.4219	41.3951	38.3325	4.03e-07	0.85356	3.09698	5.36078	0.840854
Rohitukine	2038.22	1986.42	1956.75	1786.73	1834.75	951.93	946.836	955.733	972.922	957.057
N-Mononitrosopiperazine	112.74	109.685	109.412	90.2603	90.9827	4.03e-07	3.53459	4.34212	4.04191	2.31743
CDP-DG(PGF2alpha/18:2(9Z,11Z))	1657.54	1646.38	1601.13	1497.45	1467.87	815.866	809.809	852.464	948.465	830.32
Cucurbitacin B	321.227	302.627	299.302	278.856	258.246	95.0879	103.361	108.309	124.17	92.0191
Furanodiene	460.291	449.361	471.124	448.214	416.254	233.329	236.62	239.916	261.454	251.707
SERATRODAST	3293.76	3162.55	3185.82	3162.15	3050.6	2255.31	2222.74	2273.19	2313.12	2321.48
dTDP-4-amino-2,3,4,6-tetradeoxy-D-glucose	229.112	227.982	243.177	187.947	180.6	14.2129	10.5106	16.7336	15.4565	26.157
(7'R,8'R)-4,7'-Epoxy-3'-methoxy-4',5,9,9'-lignanetetrol 9'-glucoside	165.297	158.628	159.275	135.22	125.043	26.6085	24.6819	19.883	24.2655	28.3283
Nemifitide	905.012	856.702	879.767	796.382	816.746	357.022	378.637	372.1	383.454	380.766
N-Acetylmannosamine	334.172	318.328	343.856	284.538	292.669	89.047	91.01	86.8318	96.2925	81.5673
1-(3-Aminopropyl)-pyrrolinium	294.606	293.218	311.804	249.43	261.621	4.03e-07	0.318555	4.03e-07	4.03e-07	4.03e-07
4-(2,5-Dihydroxypyrrol-1-yl)-N-(1,3-thiazol-2-yl)benzenesulfonamide	253.738	251.638	251.061	215.276	210.049	19.0105	35.8239	26.1075	27.6315	25.9771
5,6,7,8-Tetrahydro-4-methylquinoline	170.222	173.167	169.21	147.182	149.542	25.6409	22.022	18.1291	20.5446	17.3822
(S)-Coclaurine	92.1613	92.4188	92.0178	80.7857	81.0224	11.017	8.61431	7.79779	10.6279	5.4738
9-Fluoro-17-methyl-11-oxotestosterone	222.047	219.295	216.571	196.966	205.913	153.684	143.074	153.638	136.139	150.356
L-1-Pyrroline-3-hydroxy-5-carboxylate	87.61	81.1348	82.1412	69.4776	74.8746	37.6638	35.9814	38.3175	34.5829	36.8199
(R)-1-Methylpiperidine-2-carboxylic acid	96.3931	93.4439	93.0055	84.6223	89.3808	54.9048	55.2107	52.8895	46.2462	51.897
Tetralin	349.994	347.201	343.01	320.785	310.077	223.837	231.472	227.178	207.251	222.374
2,4,5,7alpha-Tetrahydro-1,4,4,7a-tetramethyl-1H-inden-2-ol	663.903	661.76	647.57	609.613	595.09	424.552	431.146	435.883	423.551	443.052
Anandamide 0-phosphate	2527.08	2463.64	2458.3	2314.69	2314.56	1723.74	1739.24	1776.29	1691.05	1825.62
CDP-DG(PGF1alpha/18:2(9Z,11Z))	2700.55	2742.06	2742.01	2515.95	2447.45	1583.79	1735.67	1683.5	1626.93	1655.93
54-Deoxy-50-hydroxyciguatoxin	1250.04	1227.06	1195.15	1059.75	1030.21	444.59	523.654	512.127	516.119	496.079
1-[[(2S,3S,4S,5R)-3,4-Dihydroxy-5-(hydroxymethyl)-2-[(2R,3R,4S,5S,6R)-3,4,5-trihydroxy-6-(hydroxymethyl)oxan-2-yl]oxyoxolan-2-yl]methoxy]propan-2-one	2961.62	2972.84	2911.05	2894.59	2883.79	2732.16	2739.02	2725.18	2747.16	2720.75
5-Methoxytryptophan	410.789	409.526	379.749	370.653	368.463	260.072	252.056	250.989	265.459	259.486
17-keto-4(Z),7(Z),10(Z),13(Z),15(E),19(Z)-Docosahexaenoic Acid	509.68	505.789	488.977	484.017	481.455	419.799	417.949	416.257	411.105	413.614
Dehydrocarpaine I	5745.55	5752.22	5310.58	5149.75	4991.66	3347.62	3398.02	3327.98	3136.37	3279.09
N-Acetyl-L-proline	188.017	186.806	160.398	158.352	169.835	71.0147	68.2493	67.2639	57.2771	56.3276
B-Octylglucoside	2813.94	2789.63	2715.42	2631.84	2711.02	2186.21	2165.13	2181.13	2178.76	2153.03
Norfuraneol	78.9433	79.4494	79.0453	79.3156	78.4728	56.7043	58.9264	56.2353	55.6606	56.8929
Isofucosterol 3-O-[6-O-(9-Octadecenoyl)-b-D-glucopyranoside]	411.574	430.337	403.544	393.769	417.285	283.754	276.646	263.943	269.467	265.678
Bafilomycin A1(Baf-A1)	1264.79	1271.46	1241.43	1260.29	1241.04	1119.87	1107.27	1092.29	1060.55	1113.15
5-O-beta-D-Mycaminosyltylactone	43.1577	46.3671	39.7407	42.5991	42.1214	28.0453	24.6822	22.1052	21.3311	22.0011
PI(16:0/PGF1alpha)	341.289	359.455	334.091	343.036	337.519	209.882	211.874	197.806	174.543	194.709
Fructose-lysine	778.636	720.246	761.588	706.075	743.397	221.403	189.808	190.217	178.91	196.202
Vanillactic acid	612.978	591.35	609.269	610.73	611.352	357.549	332.561	345.987	338.265	340.53
m-Coumaric acid	769.23	731.95	741.279	729.099	730.571	402.613	366.518	373.359	347.842	352.283
Prolyl-Methionine	369.165	347.444	369.158	350.537	359.46	229.936	222.358	219.24	214.361	210.127
Geranyl diphosphate	1103.43	1048.07	1113.58	1089.34	1097.73	821.966	772.998	809.455	774.629	785.163
N-(Carbethoxyacetyl)-4-chloro-L-tryptophan	3264.56	3179.81	3395.56	3231.97	3205.03	2210.83	2037.54	2103.01	2069.64	2079.94
5-Hydroperoxypent-1-enylbenzene	1476.4	1413.94	1529.27	1469.36	1487.89	932.072	868.02	901.51	872.664	892.65
1-Benzothiepin	3488.29	3395.4	3557.05	3540.92	3497.86	2450.86	2293.63	2391.45	2362.41	2369.19
Pyroglutamic acid	2443.69	2387.71	2402.88	2351.93	2387.03	1981.74	1880.53	1902.46	1863.47	1891.54
N-Acetyl-D-galactosamine	1683.77	1682.57	1713.81	1587.54	1651.68	997.951	1014.89	987.516	1037.87	977.342
Sambacin	513.043	510.991	506.296	493.863	513.973	288.642	287.143	301.325	293.228	270.224
3 Hydroxycoumarin	866.178	857.491	857.472	857.928	871.01	744.219	721.584	727.918	707.338	751.402
PA(P-16:0/20:4(6E,8Z,11Z,13E)-2OH(5S,15S))	765.368	738.285	763.477	762.585	771.995	635.622	657.571	625.165	629.726	647.762
NADP+	57.4609	56.9847	56.4827	62.8059	58.9807	14.6988	10.4549	24.1927	16.3223	11.4216
6-octenoylglycine	822.747	824.647	804.774	824.463	811.952	659.241	651.27	662.025	658.954	655.902
E-10-Hydroxydesmethylnortriptyline	1796.93	1757.08	1644.33	1775.12	1702.29	948.209	999.112	1045.83	993.973	942.448
3-Pentadecenal	838.822	834.447	777.713	804.001	785.931	635.29	639.962	644.948	626.703	634.063
(4Z,7Z,10Z,13Z,16Z,19Z)-Docosahexaenoic acid	391.261	381.757	347.035	351.16	348.639	192.073	182.424	195.603	199.167	157.364
Hexyl-agarose	253.688	248.945	257.847	258.378	218.921	148.764	158.981	149.419	160.424	132.355
Histidyllysine	536.124	541.63	544.533	532.95	516.399	427.827	454.069	435.021	428.187	408.678
5-(3-Pyridyl)-2-hydroxytetrahydrofuran	61.2667	56.914	66.3518	67.5876	61.2424	20.1904	23.2451	23.2449	26.1004	24.3214
(11Z,14Z)-3-Icosa-11,14-dienoylcarnitine	294.579	267.693	316.379	318.94	273.588	53.3598	81.352	54.3057	61.1124	80.1705
Arg Ala Leu Lys	4368.79	4499.29	4708.53	4828.7	4641.71	2005.36	2267.09	2106.54	2091.66	2070.79
DG(20:3(5Z,8Z,11Z)/20:3(5Z,8Z,11Z)/0:0)	278.896	258.655	291.921	329.647	287.923	61.4749	100.514	88.7462	91.4118	73.5159
Vinaginsenoside R7	4521.6	4625.35	4897.67	4723.67	4617.83	3326.29	3521.03	3608.42	3520.29	3539.46
[truncated: 595 more rows]
